# Supplementary material for: Meta-analysis of suicide rates in the first week and the first month after psychiatric hospitalisation
Source: PubMed Central journal article supplement — BMJ Open. 2019 Mar 23;9(3):e023883. doi: 10.1136/bmjopen-2018-023883 (PMC6475206; doi:10.1136/bmjopen-2018-023883), 2019-03-23

eSupplement 1. Search Strategy

Data bases Medline, PsychINFO and Embase

Dates January 1945 and 31 March 2017:

Limits. English Language

Search Terms 1. ((suicid\*).ti AND (hospital or discharg\* OR inpatient or in-patient OR admit\*). ab

Search Terms 2. ((mortality OR outcome\* OR death\*) AND (psych\* OR mental\*).ti. AND (admit\* OR admis\* or hospital\* OR inpatient\* OR in-patient\* OR discharg\*).ab

| eSupplement 2. Strength of reporting items of included studies |                   |                   |                    |                              |                             |
|----------------------------------------------------------------|-------------------|-------------------|--------------------|------------------------------|-----------------------------|
| Study name                                                     | Coronial Verdicts | Counts admissions | Defined Population | Includes Undetermined deaths | Strength of Reporting Score |
| Castelein 2015                                                 | 0                 | 0                 | 1                  | 0                            | 1                           |
| De Leo 2007                                                    | 0                 | 0                 | 0                  | 0                            | 0                           |
| Erlangsen 2006                                                 | 1                 | 0                 | 1                  | 0                            | 2                           |
| Deisenhammer 2016                                              | 1                 | 1                 | 1                  | 0                            | 3                           |
| Geddes 1997                                                    | 1                 | 0                 | 1                  | 1                            | 3                           |
| Goldacre 1993                                                  | 1                 | 1                 | 1                  | 1                            | 4                           |
| Hayashi 2012                                                   | 0                 | 0                 | 0                  | 0                            | 0                           |
| Healy 2006                                                     | 1                 | 0                 | 1                  | 0                            | 2                           |
| Ho 2003                                                        | 1                 | 0                 | 1                  | 1                            | 3                           |
| Isometsa 2014                                                  | 1                 | 1                 | 1                  | 0                            | 3                           |
| Johansson 1996                                                 | 1                 | 0                 | 0                  | 1                            | 2                           |
| Kessler 2015                                                   | 1                 | 1                 | 1                  | 0                            | 3                           |
| Lee 2009                                                       | 1                 | 1                 | 1                  | 0                            | 3                           |
| Links 2012                                                     | 0                 | 0                 | 0                  | 0                            | 0                           |
| Luxton 2013                                                    | 1                 | 0                 | 1                  | 0                            | 2                           |
| Madsen 2013                                                    | 1                 | 0                 | 1                  | 0                            | 2                           |
| Naik 1997                                                      | 1                 | 0                 | 0                  | 0                            | 1                           |
| Nyman 1986                                                     | 1                 | 1                 | 0                  | 0                            | 2                           |
| Olfson 2016                                                    | 1                 | 0                 | 1                  | 0                            | 2                           |
| Park 2013                                                      | 1                 | 0                 | 0                  | 0                            | 1                           |

|                 |   |   |   |   |   |
|-----------------|---|---|---|---|---|
| Pedersen        | 1 | 0 | 1 | 0 | 2 |
| Pirkola 2007    | 1 | 0 | 1 | 0 | 2 |
| Pokorny 1983    | 1 | 0 | 0 | 0 | 1 |
| Qurashi 2006    | 0 | 0 | 0 | 0 | 0 |
| Riblet 2017     | 1 | 1 | 1 | 0 | 3 |
| Ruengorn 2011   | 0 | 0 | 0 | 0 | 0 |
| Sani 2011       | 1 | 0 | 0 | 0 | 1 |
| Seemuller 2014  | 0 | 0 | 0 | 0 | 0 |
| Tejedor 1999    | 0 | 0 | 0 | 0 | 0 |
| Tsai 2002       | 0 | 0 | 0 | 0 | 0 |
| Tseng 2006      | 0 | 0 | 0 | 0 | 0 |
| Valenstein 2009 | 1 | 0 | 1 | 0 | 2 |
| Winkler 2015    | 1 | 0 | 1 | 0 | 2 |
| Yim2004         | 1 | 0 | 1 | 1 | 3 |

| eSupplement 3 – Suicide rates in one month following discharge from psychiatric hospitalisation |              |          |          |            |        |        |
|-------------------------------------------------------------------------------------------------|--------------|----------|----------|------------|--------|--------|
| Study                                                                                           | Person years | Suicides | Observed | Fitted     | LL     | UL     |
| Castelein                                                                                       | 36.01        | 1        | 0.0278   | 0.024<br>0 | 0.0048 | 0.1196 |
| De Leo                                                                                          | 5.00         | 0        | 0.0000   | 0.018<br>6 | 0.0023 | 0.1521 |
| Deisenhammer                                                                                    | 5471.00      | 51       | 0.0093   | 0.009<br>5 | 0.0055 | 0.0162 |
| Geddes                                                                                          | 44634.2<br>0 | 367      | 0.0082   | 0.008<br>2 | 0.0051 | 0.0132 |
| Goldacre                                                                                        | 1875.00      | 44       | 0.0235   | 0.023<br>4 | 0.0134 | 0.0407 |
| Hayashi                                                                                         | 8.83         | 0        | 0.0000   | 0.017      | 0.0023 | 0.1342 |

|           |              |      |        |            |        |        |
|-----------|--------------|------|--------|------------|--------|--------|
|           |              |      |        | 4          |        |        |
| Healy     | 11.08        | 2    | 0.1805 | 0.075<br>1 | 0.0149 | 0.3795 |
| Ho        | 5314.00      | 124  | 0.0233 | 0.023<br>3 | 0.0142 | 0.0383 |
| Isometsa  | 4769.00      | 158  | 0.0331 | 0.033<br>0 | 0.0202 | 0.0540 |
| Johansson | 321.00       | 12   | 0.0374 | 0.035<br>8 | 0.0171 | 0.0753 |
| Kessler   | 4480.75      | 17   | 0.0038 | 0.004<br>1 | 0.0021 | 0.0079 |
| Lee       | 6250.00      | 39   | 0.0062 | 0.006<br>4 | 0.0037 | 0.0112 |
| Links     | 9.92         | 3    | 0.3025 | 0.132<br>9 | 0.0312 | 0.5653 |
| Luxton    | 6050.13      | 35   | 0.0058 | 0.006<br>0 | 0.0034 | 0.0106 |
| Madsen    | 23911.9<br>2 | 374  | 0.0156 | 0.015<br>7 | 0.0097 | 0.0252 |
| Naik      | 7.25         | 0    | 0.0000 | 0.017<br>9 | 0.0023 | 0.1409 |
| Nyman     | 9.17         | 0    | 0.0000 | 0.017<br>3 | 0.0023 | 0.1328 |
| Olfson    | 63288.6<br>0 | 151  | 0.0024 | 0.002<br>4 | 0.0015 | 0.0039 |
| Park      | 700.25       | 26   | 0.0371 | 0.036<br>4 | 0.0198 | 0.0670 |
| Pirkola   | 29583.3<br>3 | 1698 | 0.0574 | 0.057<br>4 | 0.0360 | 0.0914 |
| Pokorny   | 400.00       | 16   | 0.0400 | 0.038<br>6 | 0.0194 | 0.0766 |
| Ruengorn  | 19.58        | 1    | 0.0511 | 0.031<br>5 | 0.0056 | 0.1763 |
| Seemuller | 79.25        | 1    | 0.0126 | 0.015<br>7 | 0.0036 | 0.0683 |

|            |                     |     |        |                   |        |        |
|------------|---------------------|-----|--------|-------------------|--------|--------|
| Tejedor    | 12.50               | 1   | 0.0800 | $\frac{0.037}{3}$ | 0.0061 | 0.2272 |
| Tsai       | 177.75              | 24  | 0.1350 | $\frac{0.125}{8}$ | 0.0672 | 0.2357 |
| Tseng      | 5.58                | 1   | 0.1791 | $\frac{0.046}{8}$ | 0.0066 | 0.3289 |
| Valenstein | $\frac{13149.4}{7}$ | 127 | 0.0097 | $\frac{0.009}{7}$ | 0.0059 | 0.0160 |
| Winkler    | $\frac{11440.8}{3}$ | 258 | 0.0226 | $\frac{0.022}{5}$ | 0.0140 | 0.0364 |
| Yim        | 524.33              | 20  | 0.0381 | $\frac{0.037}{1}$ | 0.0194 | 0.0710 |

| eSupplement 4. Suicide rates in one week following discharge from psychiatric hospitalisation |              |          |          |        |        |        |
|-----------------------------------------------------------------------------------------------|--------------|----------|----------|--------|--------|--------|
| Study                                                                                         | Person years | Observed | Observed | Fitted | LL     | UL     |
| Castelein                                                                                     | 8.14         | 1        | 0.1229   | 0.0548 | 0.0085 | 0.3523 |
| DeLeo                                                                                         | 5.00         | 0        | 0.0000   | 0.0255 | 0.0031 | 0.2109 |
| Deisenhammer                                                                                  | 1262.54      | 25       | 0.0198   | 0.0201 | 0.0103 | 0.0390 |
| Erlangsen                                                                                     | 1058.72      | 77       | 0.0727   | 0.0720 | 0.0404 | 0.1283 |
| Hayashi                                                                                       | 8.83         | 0        | 0.0000   | 0.0234 | 0.0030 | 0.1796 |
| Isometsa                                                                                      | 974.00       | 53       | 0.0544   | 0.0539 | 0.0296 | 0.0980 |
| Johansson                                                                                     | 74.08        | 4        | 0.0540   | 0.0481 | 0.0158 | 0.1461 |
| Kessler                                                                                       | 1034.00      | 5        | 0.0048   | 0.0062 | 0.0024 | 0.0157 |
| Lee                                                                                           | 1442.00      | 22       | 0.0153   | 0.0156 | 0.0079 | 0.0308 |
| Madsen                                                                                        | 5518.13      | 175      | 0.0317   | 0.0317 | 0.0183 | 0.0550 |
| Naik                                                                                          | 7.25         | 0        | 0.0000   | 0.0242 | 0.0031 | 0.1911 |
| Nyman                                                                                         | 9.17         | 0        | 0.0000   | 0.0232 | 0.0030 | 0.1773 |
| Olfson                                                                                        | 14776.80     | 49       | 0.0033   | 0.0034 | 0.0019 | 0.0063 |
| Park                                                                                          | 161.60       | 10       | 0.0619   | 0.0581 | 0.0253 | 0.1336 |
| Pedersen                                                                                      | 187.40       | 6        | 0.0320   | 0.0317 | 0.0123 | 0.0819 |
| Pirkola                                                                                       | 6826.92      | 1164     | 0.1705   | 0.1703 | 0.1001 | 0.2896 |
| Pokorny                                                                                       | 92.30        | 10       | 0.1083   | 0.0968 | 0.0417 | 0.2252 |
| Qurashi                                                                                       | 1.33         | 1        | 0.7536   | 0.0803 | 0.0095 | 0.6766 |

|            |          |     |        |        |        |        |
|------------|----------|-----|--------|--------|--------|--------|
| Riblet     | 21657.30 | 141 | 0.0065 | 0.0066 | 0.0038 | 0.0115 |
| Ruengorn   | 4.52     | 1   | 0.2212 | 0.0650 | 0.0091 | 0.4651 |
| Sani       | 85.31    | 2   | 0.0234 | 0.0251 | 0.0069 | 0.0919 |
| Seemuller  | 18.29    | 1   | 0.0547 | 0.0399 | 0.0073 | 0.2194 |
| Valenstein | 3026.18  | 50  | 0.0165 | 0.0167 | 0.0091 | 0.0304 |
| Winkler    | 2640.19  | 131 | 0.0496 | 0.0494 | 0.0283 | 0.0863 |

eSupplement 5 – Suicide rates in one month following discharge from psychiatric hospitalisation with gender subgroups.

| Study        | Sex | Person years | Suicides | Residual | Observed | Fitted | LL     | UL     |
|--------------|-----|--------------|----------|----------|----------|--------|--------|--------|
| Castelein    | F   | 10.36        | 0        | -0.447   | 0.0000   | 0.0096 | 0.0019 | 0.0491 |
| Castelein    | M   | 25.65        | 1        | 0.646    | 0.0390   | 0.0188 | 0.0039 | 0.0921 |
| Deisenhammer | F   | 3006.00      | 20       | 0.026    | 0.0067   | 0.0066 | 0.0033 | 0.0133 |
| Deisenhammer | M   | 2465.00      | 31       | -0.045   | 0.0126   | 0.0127 | 0.0066 | 0.0246 |
| Geddes       | F   | 24113.30     | 171      | 0.477    | 0.0071   | 0.0068 | 0.0037 | 0.0128 |
| Geddes       | M   | 20520.90     | 196      | -0.456   | 0.0096   | 0.0099 | 0.0055 | 0.0178 |
| Goldacre     | F   | 1072.00      | 16       | -0.205   | 0.0149   | 0.0158 | 0.0077 | 0.0322 |
| Goldacre     | M   | 803.00       | 28       | 0.383    | 0.0349   | 0.0323 | 0.0165 | 0.0633 |
| Ho           | F   | 2582.00      | 53       | 0.830    | 0.0205   | 0.0184 | 0.0095 | 0.0354 |
| Ho           | M   | 2732.00      | 71       | -0.543   | 0.0260   | 0.0276 | 0.0149 | 0.0512 |
| Isometsa     | F   | 2614.00      | 52       | -0.352   | 0.0199   | 0.0209 | 0.0110 | 0.0400 |
| Isometsa     | M   | 2155.00      | 106      | 0.413    | 0.0492   | 0.0471 | 0.0256 | 0.0867 |
| Kessler      | F   | 887.64       | 0        | -2.004   | 0.0000   | 0.0022 | 0.0010 | 0.0050 |
| Kessler      | M   | 3593.11      | 17       | 0.096    | 0.0047   | 0.0046 | 0.0021 | 0.0101 |
| Madsen       | F   | 12533.41     | 125      | -0.171   | 0.0100   | 0.0101 | 0.0054 | 0.0189 |

|            |   |          |     |        |        |        |        |        |
|------------|---|----------|-----|--------|--------|--------|--------|--------|
| Madsen     | M | 11378.51 | 249 | 0.157  | 0.0219 | 0.0217 | 0.0120 | 0.0391 |
| Olfson     | F | 35113.50 | 58  | -0.181 | 0.0017 | 0.0017 | 0.0009 | 0.0032 |
| Olfson     | M | 28175.10 | 93  | -0.069 | 0.0033 | 0.0033 | 0.0018 | 0.0061 |
| Valenstein | F | 1065.11  | 2   | -1.504 | 0.0019 | 0.0046 | 0.0023 | 0.0092 |
| Valenstein | M | 12084.36 | 125 | 0.215  | 0.0103 | 0.0101 | 0.0053 | 0.0196 |

**eSupplement 6. Forest Plot of studies reporting suicides by men and women in one month following discharge from psychiatric hospitalisation**

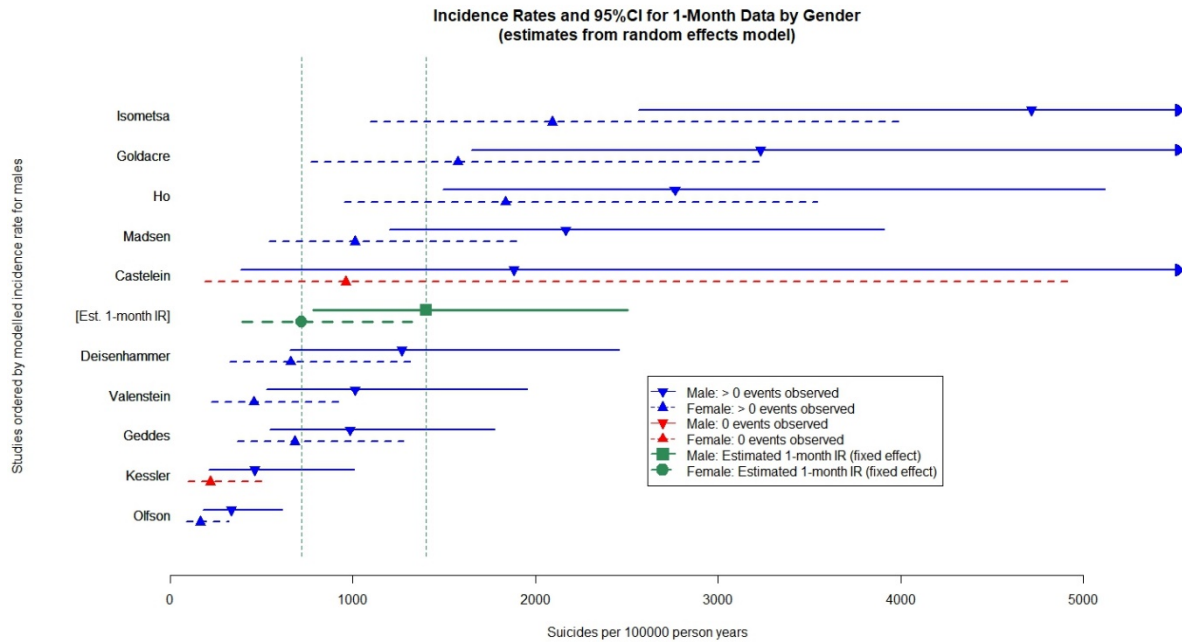

| eSupplement 7. Suicide rates in one week and two-four weeks following discharge from psychiatric hospitalisation |      |              |          |             |           |    |    |
|------------------------------------------------------------------------------------------------------------------|------|--------------|----------|-------------|-----------|----|----|
| Study                                                                                                            | Week | Person years | Observed | IR Observed | IR Fitted | LL | UL |

|              |     |          |      |        |        |        |        |
|--------------|-----|----------|------|--------|--------|--------|--------|
| Castelein    | 1   | 8.14     | 1    | 0.1229 | 0.0475 | 0.0074 | 0.3028 |
| Castelein    | 2-4 | 27.88    | 0    | 0.0000 | 0.0137 | 0.0035 | 0.0532 |
| Deisenhammer | 1   | 1262.54  | 25   | 0.0198 | 0.0192 | 0.0089 | 0.0413 |
| Deisenhammer | 2-4 | 4208.46  | 26   | 0.0062 | 0.0066 | 0.0038 | 0.0114 |
| Isometsa     | 1   | 974.00   | 53   | 0.0544 | 0.0582 | 0.0294 | 0.1153 |
| Isometsa     | 2-4 | 3795.00  | 105  | 0.0277 | 0.0261 | 0.0154 | 0.0443 |
| Johansson    | 1   | 74.08    | 4    | 0.0540 | 0.0688 | 0.0246 | 0.1923 |
| Johansson    | 2-4 | 246.92   | 8    | 0.0324 | 0.0223 | 0.0112 | 0.0444 |
| Kessler      | 1   | 1034.00  | 5    | 0.0048 | 0.0063 | 0.0025 | 0.0160 |
| Kessler      | 2-4 | 3446.75  | 12   | 0.0035 | 0.0034 | 0.0018 | 0.0064 |
| Lee          | 1   | 1442.00  | 22   | 0.0153 | 0.0138 | 0.0063 | 0.0305 |
| Lee          | 2-4 | 4808.00  | 17   | 0.0035 | 0.0043 | 0.0025 | 0.0076 |
| Madsen       | 1   | 5518.13  | 175  | 0.0317 | 0.0317 | 0.0166 | 0.0605 |
| Madsen       | 2-4 | 18393.79 | 199  | 0.0108 | 0.0108 | 0.0064 | 0.0181 |
| Olfson       | 1   | 14776.80 | 49   | 0.0033 | 0.0034 | 0.0017 | 0.0068 |
| Olfson       | 2-4 | 48511.80 | 102  | 0.0021 | 0.0021 | 0.0012 | 0.0036 |
| Park         | 1   | 161.60   | 10   | 0.0619 | 0.0711 | 0.0299 | 0.1691 |
| Park         | 2-4 | 538.65   | 16   | 0.0297 | 0.0240 | 0.0132 | 0.0435 |
| Pirkola      | 1   | 6826.92  | 1164 | 0.1705 | 0.1698 | 0.0909 | 0.3173 |
| Pirkola      | 2-4 | 22756.41 | 534  | 0.0235 | 0.0237 | 0.0142 | 0.0395 |
| Pokorny      | 1   | 92.30    | 10   | 0.1083 | 0.0934 | 0.0364 | 0.2393 |
| Pokorny      | 2-4 | 307.70   | 6    | 0.0195 | 0.0216 | 0.0114 | 0.0409 |
| Ruengorn     | 1   | 4.52     | 1    | 0.2212 | 0.0606 | 0.0086 | 0.4286 |
| Ruengorn     | 2-4 | 15.06    | 0    | 0.0000 | 0.0165 | 0.0039 | 0.0699 |
| Seemuller    | 1   | 18.29    | 1    | 0.0547 | 0.0314 | 0.0056 | 0.1751 |
| Seemuller    | 2-4 | 60.96    | 0    | 0.0000 | 0.0101 | 0.0029 | 0.0347 |
| Valenstein   | 1   | 3026.18  | 50   | 0.0165 | 0.0170 | 0.0085 | 0.0339 |



|            |     |          |     |        |        |        |        |
|------------|-----|----------|-----|--------|--------|--------|--------|
| Valenstein | 2-4 | 10123.29 | 77  | 0.0076 | 0.0075 | 0.0044 | 0.0127 |
| Winkler    | 1   | 2640.19  | 131 | 0.0496 | 0.0495 | 0.0256 | 0.0954 |
| Winkler    | 2-4 | 8800.64  | 127 | 0.0144 | 0.0144 | 0.0086 | 0.0243 |

## eSupplement 8. Forrest Plot Suicide rates in one week and two-four weeks following discharge from psychiatric hospitalisation

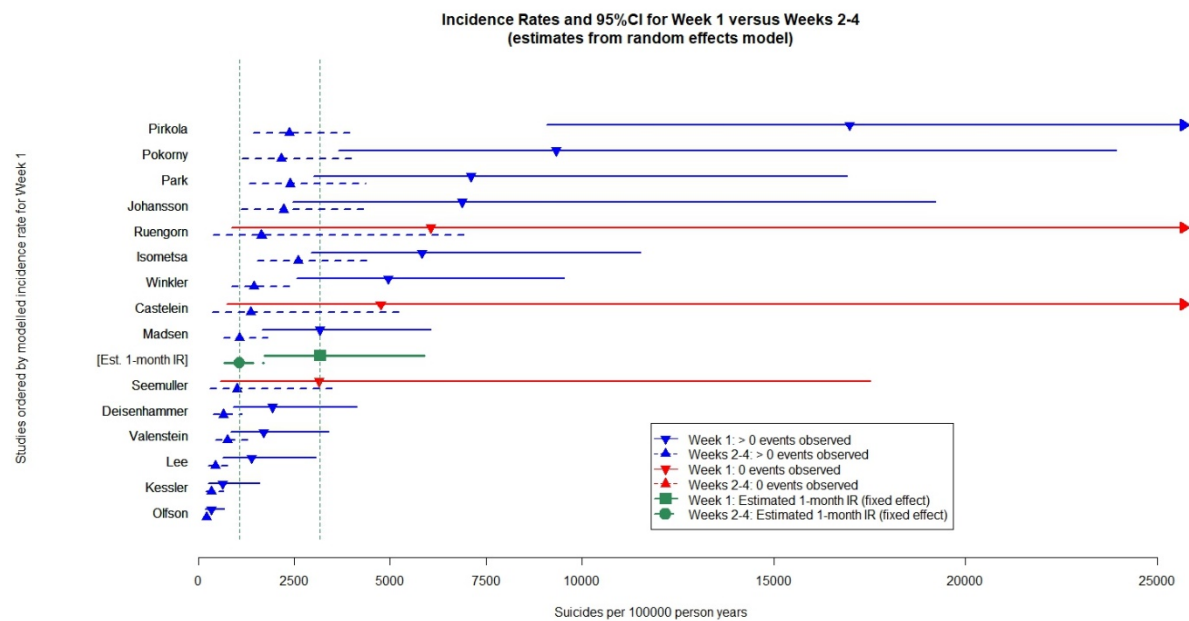

## eSupplement 9. Funnel Plot of Suicide rates in one month following discharge from psychiatric hospitalisation

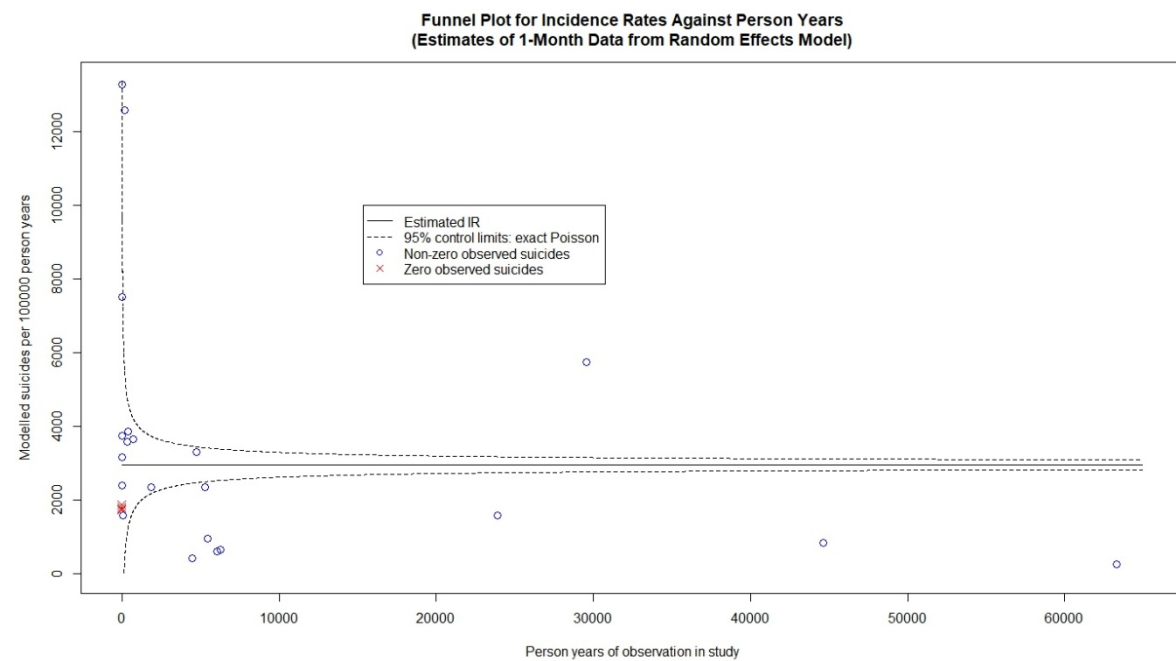

**eSupplement 10. Funnel Plot of Suicide rates in one week following discharge from psychiatric hospitalisation**

**Funnel Plot for Incidence Rates Against Person Years  
(Estimates of 1-Week Data from Random Effects Model)**

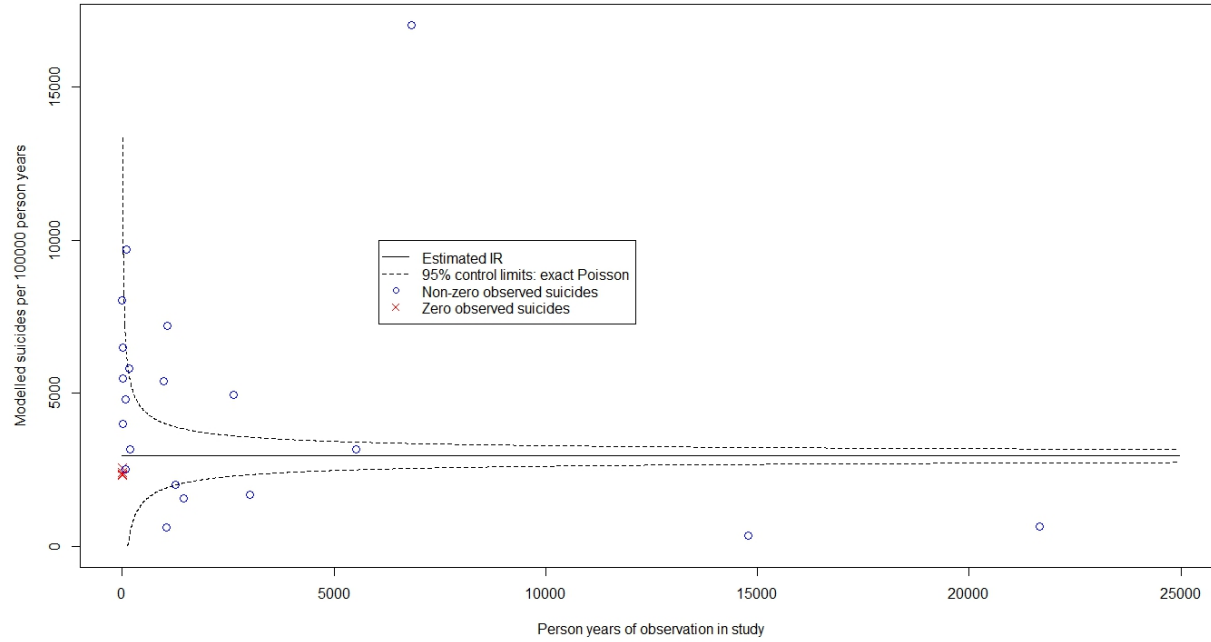

Supplement: bmjopen-2018-023883supp001.pdf [file bmjopen-2018-023883supp001.pdf]
