# Supplementary material for: Meta-analysis of suicide rates in the first week and the first month after psychiatric hospitalisation
Source: PubMed Central journal article supplement — BMJ Open. 2019 Mar 23;9(3):e023883. doi: 10.1136/bmjopen-2018-023883 (PMC6475206; doi:10.1136/bmjopen-2018-023883), 2019-03-23
Supplement: bmjopen-2018-023883.draft_revisions.pdf [file bmjopen-2018-023883.draft_revisions.pdf]

# BMJ Open

BMJ Open is committed to open peer review. As part of this commitment we make the peer review history of every article we publish publicly available.

When an article is published we post the peer reviewers' comments and the authors' responses online. We also post the versions of the paper that were used during peer review. These are the versions that the peer review comments apply to.

The versions of the paper that follow are the versions that were submitted during the peer review process. They are not the versions of record or the final published versions. They should not be cited or distributed as the published version of this manuscript.

BMJ Open is an open access journal and the full, final, typeset and author-corrected version of record of the manuscript is available on our site with no access controls, subscription charges or pay-per-view fees (<http://bmjopen.bmj.com>).

If you have any questions on BMJ Open's open peer review process please email [editorial.bmjopen@bmj.com](mailto:editorial.bmjopen@bmj.com)

# BMJ Open

## Meta-analysis of suicide rates in the first week and first month after psychiatric hospitalisation

|                               |                                                                                                                                                                                                                                                                                                                                                                                                                |
|-------------------------------|----------------------------------------------------------------------------------------------------------------------------------------------------------------------------------------------------------------------------------------------------------------------------------------------------------------------------------------------------------------------------------------------------------------|
| Journal:                      | <i>BMJ Open</i>                                                                                                                                                                                                                                                                                                                                                                                                |
| Manuscript ID                 | bmjopen-2018-023883                                                                                                                                                                                                                                                                                                                                                                                            |
| Article Type:                 | Research                                                                                                                                                                                                                                                                                                                                                                                                       |
| Date Submitted by the Author: | 01-May-2018                                                                                                                                                                                                                                                                                                                                                                                                    |
| Complete List of Authors:     | Chung, Daniel; The University of New South Wales, School of Psychiatry<br>Hadzi-Pavlovic, Dusan; UNSW Australia,<br>Wang, Maggie; The University of New South Wales, School of Psychiatry<br>Swaraj, Sascha; The University of New South Wales, School of Psychiatry<br>Olfson, Mark; Columbia University, Department of Psychiatry<br>Large, Matthew; The University of New South Wales, School of Psychiatry |
| Keywords:                     | Suicide & self-harm < PSYCHIATRY, Risk management < HEALTH SERVICES ADMINISTRATION & MANAGEMENT, EPIDEMIOLOGY                                                                                                                                                                                                                                                                                                  |
|                               |                                                                                                                                                                                                                                                                                                                                                                                                                |

SCHOLARONE™  
Manuscripts

Peer Review Only

## Meta-analysis of suicide rates in the first week and first month after psychiatric hospitalisation

---

Daniel Thomas Chung, MD (candidate), Faculty of Medicine, University of New South Wales, NSW, Australia

Dusan Hadzi-Pavlovic, BSc, MPsychol, School of Psychiatry, University of New South Wales, NSW, Australia

Maggie Wang MD (candidate), Faculty of Medicine, University of New South Wales, NSW, Australia

Sascha Swaraj MD (candidate), Faculty of Medicine, University of New South Wales, NSW, Australia

Mark Olfson, MD, MPH, Department of Psychiatry, Columbia University, Irving Medical Center, New York, NY, USA

Matthew Michael Large, BSc, MBBS, FRANZCP, DMedSc, School of Psychiatry, University of New South Wales, NSW, Australia †

† Correspond with Matthew Large, Mental Health Services, The Prince of Wales Hospitals, Barker Street, Randwick, NSW, 2031, Australia.

<mailto:matthew.large@health.nsw.gov.au>

### ABSTRACT

#### Objective

To assess the magnitude of suicide rates in the first week and first month post-discharge from psychiatric hospitalisation.

#### Design

Systematic meta-analysis of relevant English-language, peer-reviewed located in Medline, PsychINFO or Embase and supplemented by hand searching and by personal communication. In all analyses a generalized linear mixed effects model

was fitted to the number of suicides, with a Poisson distribution, log link, and log of person years as an offset. All models included a random effects model at the level of study.

### Outcome Measures

Suicides per 100,000 person years in the week and first month after discharge from psychiatric hospitalisation.

### Results

Twenty-nine studies reported 3,551 suicides during 222,546 patient years in the first month post-discharge. The pooled estimate of the first month post-discharge suicide rate was 2,060 (95% confidence interval (CI) = 1,300–3,280 suicides per 100,000 person years with high between study heterogeneity ( $I^2=89.5$ ). Twenty-four studies reported 1,928 suicides during 60,880 patient years in the first week post-discharge. The pooled estimate of the first month post-discharge suicide rate was 2,950 (95% CI = 1,740–5,000 suicides per 100,000 person years with high between study heterogeneity,  $I^2 = 87.7$ )

### Conclusion

Acknowledging the presence of marked heterogeneity between studies, the first month post-discharge from psychiatric hospitalisation, particularly the first week, is a time of extraordinary suicide risk. Short-term follow-up of discharged patients should be augmented with greater focus on safe transition from hospital to community care.

### Registration

Prospero registration CRD42016038169

### Funding

No funding source involved.

### Strengths and limitations of this study

- Published and previously unavailable data were synthesised to estimate rates of suicide in the first week and first month post discharge from psychiatric hospitalisation
- Rates of suicide were about 3000 and 2000 per 100,000 person years respectively in the first week and first month post discharge
- Published studies reported higher suicide rates than data obtained by personal communication
- High between study heterogeneity impacts on the generalizability of our estimated rates
- The period immediately following discharge from psychiatric hospitalisation should be regarded as a distinct phase of care associated with an extraordinary suicide risk.

### Data Sharing

All Individual study data is available in the supplementary material.

### Introduction

Suicidal thoughts and behaviour are among the most common reasons for in-patient psychiatric care.<sup>1,2</sup> Despite the care and protection against suicide offered by psychiatric hospitalisation, rates of suicide by current inpatients are worryingly high<sup>3</sup> and appear to be further elevated after discharge. A recent meta-analysis estimated a rate of suicide of 1,132 per 100,000 person years in the first three months post-discharge.<sup>4</sup> Although several primary studies have reported on suicide in the immediate post-discharge period<sup>5-7</sup> expected rates of suicide in the first week and month of transition from the hospital to the community remain uncertain.

The aim of this study was to calculate a pooled estimate and statistical dispersion (range, median and quartile values) of one-week and one-month post-discharge suicide rates.

## Methods

The meta-analysis was registered with PROSPERO<sup>8</sup> (Registration CRD42016038169) and conducted according to PRISMA<sup>9</sup> and MOOSE<sup>10</sup> guidelines.

### Search Strategy and Selection Criteria

We included studies that reported the number of adults discharged and the number of suicides in the first week (one-week) and first month or 28 days post-discharge (referred to here as one-month) after psychiatric hospitalisation. In order to focus on the suicides after discharge from acute adult psychiatric hospitalisation, we excluded studies of post-discharge suicide after release from child and adolescent wards, long-stay wards, forensic facilities, emergency departments, and medical or surgical wards of general hospitals. Studies were excluded if the number of suicides and number of person years were not reported, could not be calculated, or could not be obtained by email from the authors.

Two authors (DC and ML) independently searched Medline, PsychINFO and Embase for relevant papers published in English (See Figure 1). Electronic searches were supplemented by hand searches of the relevant review articles. Grey literature was not considered. DC and ML independently winnowed titles, abstracts, and full text papers. Whenever possible the authors of studies reporting post-discharge suicide rates over periods of longer than a month were contacted by email for data regarding suicides in the one-week and one-month periods, and those reporting post-discharge suicide in the first month or 28 days were contacted for data about suicides in the first week post-discharge.

### Data extraction

SS and MW independently extracted the data and ML and DC performed a further independent check of the data jointly. The number of person years was calculated using the number of discharges and the period of follow-up of 28 or 31 days when it was not directly reported in the paper. Where the follow up was specified to be 'one-month' the length of follow up was assumed to be  $365/12 = 30.4$  days. Separate figures were extracted for

1  
2  
3 men and women and for the first and subsequent weeks of follow up where  
4 possible.  
5

6  
7 A predetermined list of moderator variables was extracted for each sample:  
8 including the country in which the study was conducted, whether the data  
9 was obtained by personal communication with the authors and according to  
10 a strength of reporting scale.  
11  
12

13  
14 The strength of reporting of each study was assessed using a 0-4 point  
15 scale derived from the Newcastle-Ottawa Scale for assessing the quality of  
16 nonrandomised studies<sup>11</sup> and used in a previous meta-analysis of post-  
17 discharge suicide rates.<sup>4</sup> One point was awarded if the study: identified  
18 suicides using coroners' records or a national mortality database (rather  
19 than using hospital records); included all the post-discharge suicides in a  
20 defined geographic region (rather than suicides from a particular care  
21 setting); included open verdicts in suicide numbers; reported the number of  
22 discharges (rather than the number of individuals).  
23  
24  
25  
26  
27  
28

### 29 **Data analysis**

30  
31  
32  
33 The effect sizes of interest were the incidence rate (IR), expressed as suicides per  
34 100,000 person years and the incidence rate ratio (IRR). In all analyses a  
35 generalized linear mixed effects model was fitted to a count response (number of  
36 suicides), with a Poisson distribution, log link, and log of person years as an offset.  
37 All models included a random effect (intercept) for study. Confidence intervals were  
38 based on t-distribution with df equal to the number of studies. All models were fitted  
39 with the R package lme4. Some standard errors were calculated using the delta  
40 method from the R package car.  
41  
42  
43  
44  
45  
46

47 Pre-specified subgroup analyses according to the period of follow up, source of the  
48 data (published or obtained by personal communication), country of publication, sex,  
49 and strength of reporting.  
50  
51  
52  
53  
54  
55  
56  
57  
58  
59  
60

1  
2  
3 Publication bias was assessed by comparing the results reported in published  
4 studies to that obtained by personal communication and by the examination of  
5  
6 Funnel Plots.  
7  
8  
9

### 10 **Patient and Public Involvement**

11 The results of this study were discussed with Easter Suburbs Mental Health Service,  
12  
13 Consumer Advisory Group for their views on suicide prevention in the suicide in the  
14  
15 post discharge period.  
16  
17  
18  
19  
20  
21  
22  
23  
24  
25  
26  
27  
28  
29  
30  
31  
32  
33  
34  
35  
36  
37  
38  
39  
40  
41  
42  
43  
44  
45  
46  
47  
48  
49  
50  
51  
52  
53  
54  
55  
56  
57  
58  
59  
60



## Results

Two independent searches (DC and ML) identified 24 of 26 papers reporting on suicides occurring in the first week or first month after discharge. A further 8 studies could be included after data were provided by personal communication with the authors, such that results for suicides in the first week or first month (or both) post-discharge was available from 34 papers (Table 1, eSupplement 1.). Of the 34 studies, 8 were from Asian countries, 1 was from Australia, 13 from mainland Europe and Nordic countries, 7 from North America and 5 from the United Kingdom. The earliest study was published in 1983, the median year of publication was 2009 and the most recent was published in 2017. Twenty-nine papers contained data pertaining to the first month post-discharge (eSupplement 2). Twenty-four papers reported on suicides in the first week post-discharge (eSupplement 3).

There were disagreements about 6 of the 68 data points relating to effect size. All disagreements were resolved by a second examination of the data by DC and ML.

Twenty-nine studies reported 3,551 suicides in the first month after discharge during 222,546 person years. The mean number of suicides per study was 122.4 (SD 442.9) and the mean number of person years per study was 7,674 (SD 22 581). Four studies with no suicides were included in the analysis. The median sample suicide rate was 2,333 per 100,000 person years with a range of 0 to 30,252 per 100,000 person years. The first and third quartiles were 601 and 4,555 per 100,000 person years, respectively (see Figure 2. Forrest Plot of suicide rates in one month following discharge from psychiatric hospitalisation)

The pooled rate of one-month post-discharge suicide was 2,060 per 100,000 person years (95% CI 1,300–3,280) with very high between-sample heterogeneity ( $Q = 266.8$ ,  $p < 0.001$ ,  $I^2 = 89.51$ ). The eight studies deemed to have stronger reporting strength had a lower pooled suicide rate of 1,360 per 100,000 person years compared to the 20 studies with less

1  
2  
3 strong reporting that had a pooled suicide rate of 2,720 per 100,000 person  
4 years (IRR 2.00 95% CI 1.98–2.01). The eight studies from Asian countries  
5 had the highest pooled suicide rate of 3,230 per 100,000 person years (95%  
6 CI 1,470–7,100), followed by the 10 studies from European countries (2,340  
7 per 100,000 person years, 95% CI 1,170–4,680), the five studies from the  
8 UK (2,020, 95% CI 630–6,490), and the 6 North American studies had the  
9 lowest rate (1,030, 95% CI 450–2,380).  
10  
11  
12  
13

14  
15 Data for male and female suicides was available for 10 of the 29 studies  
16 reporting one-month post-discharge suicides including 6 studies with  
17 gendered data obtained by personal communication. Men had a  
18 significantly higher pooled rate of suicide (1,400 per 100,000 person years,  
19 95%, CI 780 – 2,500) than women (720 per 100,000 person years, 95%, CI  
20 390 – 1,320: IRR 1.94 95%, CI 1.54 – 2.44) and a higher rate of suicide in  
21 each of the 10 studies (See eSupplement 4 & 5).  
22  
23  
24  
25  
26

27 Excluding four studies that reported no suicides in the first week or first  
28 month, fifteen studies reported suicides in the first month post-discharge  
29 and reported suicides in the first week post-discharge allowing a direct  
30 comparison of the suicide rate in the first week post-discharge to the  
31 remaining 8-31 days. Among these studies, the pooled suicide rate in the  
32 first week post-discharge was 3,170 per 100,000 (95%, CI 1,710–5,890)  
33 compared to a rate of 1,060 per 100,000 person years (95% CI, 660–1,700;  
34 IRR 2.99 95% CI 2.24- 3.97) in post-discharge day 8-31. Suicide rates were  
35 higher in the first week than in the subsequent period in every study that  
36 had 1 or more suicides in the first week (See eSupplement 6 & 7).  
37  
38  
39  
40  
41  
42  
43

44 The seven data points obtained by personal communication had a  
45 significantly lower one-month post-discharge suicide rate of 920 suicides  
46 per 100,000 person years compared to 22 data points extracted directly  
47 from the publications of 2 880 per 100,000 person years (IRR 3.14, 95% CI  
48 1.29 – 7.63). The Funnel Plot was characterised by 8 studies with lower  
49 suicide rates than the pooled estimate and 5 studies with higher suicide  
50 rates than the pooled estimate lying outside the Funnel (eSupplement 8).  
51  
52  
53  
54  
55  
56  
57  
58  
59  
60

1  
2  
3 Data from 24 studies could be included in a meta-analysis of one-week  
4 post-discharge suicide rates. These included the 15 studies reporting  
5 suicides within a month and a week, four studies that reported no suicides  
6 in the first month, and an additional five studies that did not report suicides  
7 in the first month. The 24 studies reported a total of 1,928 suicides (mean =  
8 80.3 per study, SD= 315.5, median = 8) per study during 60,880 person  
9 years (mean = 2536.7 per study, SD = 7783, median = 174.5). The median  
10 sample suicide rate was 3 186 per 100,000 person years (range 0–75,000  
11 per 100,000, first quartile = 567, third quartile = 6,730).

12  
13  
14  
15  
16  
17  
18 The pooled one-month post-discharge suicide rate was 2,950 suicides per  
19 100,000 person years (24 studies, 95% CI 1,740-5,000) with very high  
20 between study heterogeneity ( $Q = 186.4$ ,  $p < 0.0001$ ),  $I^2 = 87.66$ ). (see  
21 Figure 3. Forrest Plot of suicide rates in one week following discharge from  
22 psychiatric hospitalisation). Studies considered to have a lower strength of  
23 reporting had a higher rate of suicide (19 studies, 3,950 per 100,000 person  
24 years, 95% CI 3,910–3,990) than studies with less strong reporting (5  
25 studies, 1,400 per 100,000 person years, 95% CI 1,380-1,410; IRR 2.83  
26 95% CI 2.80-2.85).

27  
28  
29  
30  
31  
32  
33 Data extracted from published papers suggested a significantly higher rate  
34 of suicide (16 studies, 5,090 per 100,000 person years, 95% CI 2,930-  
35 8,840) than personally communicated data (8 studies, 1,400 per 100,000  
36 person years, 95% CI 740–2,680; IRR 3.63, 95% CI 1.55 – 8.49). The  
37 Funnel Plot was characterised by 5 studies with lower suicide rates than the  
38 pooled estimate and 4 studies with higher suicide rates than the pooled  
39 estimate lying outside the Funnel (eSupplement 9).  
40  
41  
42  
43  
44  
45  
46  
47  
48  
49  
50  
51  
52  
53  
54  
55  
56  
57  
58  
59  
60

## Discussion

This study synthesises over thirty years of research into suicide rates in the immediate period after a psychiatric hospitalisation. One-week post-discharge suicide rates were approximately 3,000 suicides per 100,000 person years while one-month rates were approximately 2,000 per 100,000 person years. Rates from the beginning of the second week to the end of the fourth week or one-month post-discharge were approximately 1,000 per 100,000 person years. These rates can be seen in relation to national suicide rates and compared to earlier meta-analytic estimates of post-discharge suicide over longer periods of follow up. Rates of suicide of 2000 to 3,000 per 100,000 person years are about 200–300 times typical rates of suicide rate in the general populations<sup>12</sup> and are twice to three time estimated rates of suicide of 1,132 per 100,000 person years in the first three months and first year post-discharge respectively.<sup>4</sup> The six-fold risk of suicide in the first week post-discharge compared to the long term rates of suicide after psychiatric discharge of about 500 per 100,000 person years can be compared to meta-analytic estimates of the strength of clinical risk factors for suicide (odds ratio =1.50)<sup>13</sup> and high-risk models for suicide (odds ratio = 4.84)<sup>14</sup> reported in longitudinal studies. This confirms the view that period following discharge is at least as important, and likely a more important suicide risk factor than other clinical risks factors.<sup>15</sup>

The main limitation of our study is that there remains uncertainty about the extent to which our pooled estimates can be generalised. We observed very high between-study heterogeneity that was at least partly explained by publication bias towards studies with high suicide rates in this period. Moreover, in all likelihood there are real differences in post discharge suicide rates between settings some of which might be explained by the characteristics of the patients who are admitted and quantity and quality of post-discharge care. Finally, we found some evidence of lower rates of suicide reported in studies that we considered had stronger methods and therefore less risk of biased findings.

Our findings emphasise the importance of post-discharge follow up. Currently in the United States only around half of commercially insured

1  
2  
3 patients and a third of Medicare patients in the US received a psychiatric  
4 follow-up visit within 7 days of hospital discharge for a mental illness.<sup>16</sup> In  
5 the United Kingdom, the NICE guidelines suggest that people discharged  
6 from mental health settings are followed up within seven days.<sup>17</sup> While the  
7 introduction of a seven day follow period is one of a suite of measures that  
8 do seem to be associated lower suicide rates in the UK<sup>18</sup> it is sobering to  
9 consider that some patients who are scheduled to be followed up at the  
10 seven day mark will die before they are ever reassessed.  
11  
12  
13  
14  
15

16 The very high rates of suicide in the immediate post-discharge should encourage  
17 clinicians to think carefully about the patient's transition from hospital to the  
18 community. Qualitative research suggests that the transition from hospital to home is  
19 associated with the re-emergence of pre-existing social stresses and new stresses  
20 associated with hospitalisation.<sup>19-21</sup> Clinicians should consider strategies that might  
21 improve this transition, including pre- and post-discharge patient psychoeducation, a  
22 formal needs based assessments, use of transitional care teams and improved  
23 communication between the inpatient team, and greater involvement of the patient's  
24 outpatient team and family.<sup>22</sup> The high risk of suicide during the period immediately  
25 following hospital discharge provides a clinical rationale for conceptualizing the first  
26 post-discharge month as a distinct phase of recovery and treatment, especially in the  
27 context of pervasive gaps in treatment following psychiatric hospitalization.  
28  
29  
30  
31  
32  
33  
34  
35

36 Traditional case management approaches to continuity of care following psychiatric  
37 hospitalisation have not consistently yielded promising results. In one review, two of  
38 seven studies of telephone follow-up and one of five studies that involved facilitating  
39 communication between inpatient and outpatient clinicians resulted in a significant  
40 increase in continuity of care<sup>22</sup>. Intensive interventions that involve home visits,  
41 social support, motivational interviewing, and accompanying patients to outpatient  
42 appointments have yielded more encouraging results.<sup>23 24</sup>  
43  
44  
45  
46  
47

48 Our finding of higher rates of suicides by men in the immediate post-  
49 discharge period is unsurprising because of the preponderance of men  
50 among all suicides<sup>12</sup> but is in contrast with less clear gender effects on  
51 inpatient suicide rates.<sup>25 26</sup>  
52  
53  
54  
55  
56  
57  
58  
59  
60

1  
2  
3 Other limitations relate to the representativeness of the included studies. All  
4 of the research came from high-income economies of Asia, Australasia,  
5 North America, and Europe and our results might not be representative of  
6 post-discharge suicide in low and middle-income countries. Moreover, there  
7 were an insufficient number of studies to determine whether apparent  
8 differences in suicide rates between regions were real or were simply the  
9 result of the set of available studies. Differences between rates of post-  
10 discharge suicide between countries are plausible because of differences in  
11 national suicide rates,<sup>12</sup> progress towards deinstitutionalisation,<sup>27</sup> and likely  
12 national differences in the quality of mental health care systems<sup>28</sup>  
13  
14  
15  
16  
17  
18

19  
20 Although it has been argued that one way of combatting post-discharge  
21 suicide is to focus on individual patients with clinical characteristics that  
22 signify a high suicide risk,<sup>29 30</sup> the very high suicide rates calculated in this  
23 study and the known limitations of suicide risk assessment<sup>31</sup> suggest that a  
24 narrow focus on clinical risk assessment might mislead clinicians into  
25 thinking that some patients can be regarded as being at low risk post-  
26 discharge.<sup>32</sup> Our findings better support the views of authors who believe in  
27 an approach to suicide prevention focussed on whole cohorts of discharged  
28 patients.<sup>33</sup>  
29  
30  
31  
32  
33  
34  
35  
36  
37  
38  
39  
40  
41  
42  
43  
44  
45  
46  
47  
48  
49  
50  
51  
52  
53  
54  
55  
56  
57  
58  
59  
60

### **Role of the funding source**

There was no funding source for this study.

### **Conflicts of Interest**

Dr. Olfson reports grants from Janssen Scientific Affairs, outside the submitted work.

### **Author Contributions**

Daniel Chung - literature search, study design, data interpretation and writing.

Mr Dusan-Hadzi Pavlovic - figures, data analysis, study design, writing

Maggie Wang - data collection, data interpretation and writing

Sascha Swaraj - data collection, data interpretation and writing

Mark Olfson - literature review, data collection, data interpretation, writing and critical review and writing.

Matthew Large - study supervision, literature search, study design, data interpretation and writing

Dr Large has full access to all the data in the study and takes responsibility for the integrity of the data and accuracy of the analysis

### **Acknowledgment**

The authors would like to thank the following authors who provided further information about their published studies of suicide after psychiatric hospitalisation:

Dr Ebehard Deisenhammer, Dr Erkki Isometsa, Dr Ron Kessler, Dr Edith Liemburg;

Dr Natalie Riblet, Dr Marcia Valenstein.

There was no funding source for this study.



## References

1. Ziegenbein M, Anreis C, Bruggen B, et al. Possible criteria for inpatient psychiatric admissions: which patients are transferred from emergency services to inpatient psychiatric treatment? *BMC health services research* 2006;6:150. doi: 10.1186/1472-6963-6-150
2. Abas M, Vanderpyl J, Le Prou T, et al. Psychiatric hospitalization: reasons for admission and alternatives to admission in South Auckland, New Zealand. *The Australian and New Zealand journal of psychiatry* 2003;37(5):620-5. doi: 10.1046/j.1440-1614.2003.01229.x
3. Walsh G, Sara G, Ryan CJ, et al. Meta-analysis of suicide rates among psychiatric in-patients. *Acta psychiatrica Scandinavica* 2015 doi: 10.1111/acps.12383 [published Online First: 2015/01/07]
4. Chung DT, Ryan CJ, Hadzi-Pavlovic D, et al. Suicide Rates After Discharge From Psychiatric Facilities: A Systematic Review and Meta-analysis. *JAMA psychiatry* 2017 doi: 10.1001/jamapsychiatry.2017.1044
5. Ho T-P. The suicide risk of discharged psychiatric patients. *The Journal of clinical psychiatry* 2003;64(6):702-07.
6. Goldacre M, Seagroatt V, Hawton K. Suicide after discharge from psychiatric inpatient care. *Lancet* 1993;342(8866):283-6.
7. Geddes JR, Juszczak E. Period trends in rate of suicide in first 28 days after discharge from psychiatric hospital in Scotland, 1968-92. *Bmj* 1995;311(7001):357-60.
8. PROSPERO. International prospective register of systematic reviews <https://www.crd.york.ac.uk/prospero/> [
9. Liberati A, Altman DG, Tetzlaff J, et al. The PRISMA statement for reporting systematic reviews and meta-analyses of studies that evaluate health care interventions: explanation and elaboration. *Journal of clinical epidemiology* 2009;62(10):e1-34. doi: 10.1016/j.jclinepi.2009.06.006
10. Stroup DF, Berlin JA, Morton SC, et al. Meta-analysis of observational studies in epidemiology: a proposal for reporting. Meta-analysis Of Observational Studies in Epidemiology (MOOSE) group. *JAMA : the journal of the American Medical Association* 2000;283(15):2008-12. [published Online First: 2000/05/02]



- 1  
2  
3 11. Wells GA, Shea B, O'Connell D, et al. The Newcastle-Ottawa Scale (NOS) for  
4 assessing the quality of nonrandomised studies in meta-analyses. Accessed  
5 from [http://www.ohrica/programs/clinical\\_epidemiology/oxfordasp](http://www.ohrica/programs/clinical_epidemiology/oxfordasp) 2013  
6  
7
- 8 12. Age-standardized suicide rates (per 100 000 population): World Health  
9 Organisation 2015 [(accessed October 2015 from  
10 [http://www.who.int/gho/mental\\_health/suicide\\_rates/en/](http://www.who.int/gho/mental_health/suicide_rates/en/)).  
11  
12
- 13 13. Franklin JC, Ribeiro JD, Fox KR, et al. Risk factors for suicidal thoughts and  
14 behaviors: A meta-analysis of 50 years of research. *Psychological bulletin*  
15 2017;143(2):187-232. doi: 10.1037/bul0000084  
16  
17
- 18 14. Large M, Kaneson M, Myles N, et al. Meta-Analysis of Longitudinal Cohort  
19 Studies of Suicide Risk Assessment among Psychiatric Patients:  
20 Heterogeneity in Results and Lack of Improvement over Time. *PloS one*  
21 2016;11(6):e0156322. doi: 10.1371/journal.pone.0156322  
22  
23
- 24 15. Olfson M, Marcus SC, Bridge JA. Focusing suicide prevention on periods of high  
25 risk. *JAMA : the journal of the American Medical Association*  
26 2014;311(11):1107-8. doi: 10.1001/jama.2014.501  
27  
28
- 29 16. NCQA. Follow-up after hospitalisation for Mental Illness  
30 [http://www.ncqa.org/report-cards/health-plans/state-of-health-care-](http://www.ncqa.org/report-cards/health-plans/state-of-health-care-quality/2017-table-of-contents/follow-up)  
31 [quality/2017-table-of-contents/follow-up](http://www.ncqa.org/report-cards/health-plans/state-of-health-care-quality/2017-table-of-contents/follow-up): National Committee for Quality  
32 Assurance; 2016 [accessed 28 January 2018].  
33  
34
- 35 17. NICE. Transition between inpatient mental health settings and community or care  
36 home settings: National Institute for Health and Care Excellence, 2016.  
37  
38
- 39 18. While D, Bickley H, Roscoe A, et al. Implementation of mental health service  
40 recommendations in England and Wales and suicide rates, 1997-2006: a  
41 cross-sectional and before-and-after observational study. *Lancet*  
42 2012;379(9820):1005-12. doi: 10.1016/S0140-6736(11)61712-1  
43  
44
- 45 19. Owen-Smith A, Bennewith O, Donovan J, et al. "When you're in the hospital,  
46 you're in a sort of bubble." Understanding the high risk of self-harm and  
47 suicide following psychiatric discharge: a qualitative study. *Crisis*  
48 2014;35(3):154-60. doi: 10.1027/0227-5910/a000246  
49  
50
- 51 20. Chung DT, Ryan CJ, Large MM. Commentary: Adverse experiences in  
52 psychiatric hospitals might be the cause of some postdischarge suicides. *Bull*  
53 *Menninger Clin* 2016;80(4):371-75. doi: 10.1521/bumc.2016.80.4.371  
54  
55  
56  
57  
58  
59

- 1  
2  
3 21. Schechter M, Goldblatt MJ, Ronningstam E, et al. Postdischarge suicide: A  
4 psychodynamic understanding of subjective experience and its importance in  
5 suicide prevention. *Bull Menninger Clin* 2016;80(1):80-96. doi:  
6 10.1521/bumc.2016.80.1.80  
7  
8  
9 22. Vigod SN, Kurdyak PA, Dennis CL, et al. Transitional interventions to reduce  
10 early psychiatric readmissions in adults: systematic review. *The British journal*  
11 *of psychiatry : the journal of mental science* 2013;202(3):187-94. doi:  
12 10.1192/bjp.bp.112.115030  
13  
14  
15 23. Dixon L, Goldberg R, Iannone V, et al. Use of a critical time intervention to  
16 promote continuity of care after psychiatric inpatient hospitalization.  
17 *Psychiatric services* 2009;60(4):451-8. doi: 10.1176/ps.2009.60.4.451  
18  
19 24. Shaffer SL, Hutchison SL, Ayers AM, et al. Brief Critical Time Intervention to  
20 Reduce Psychiatric Rehospitalization. *Psychiatric services* 2015;66(11):1155-  
21 61. doi: 10.1176/appi.ps.201400362  
22  
23  
24 25. Large M, Myles N, Myles H, et al. Suicide risk assessment among psychiatric  
25 inpatients: a systematic review and meta-analysis of high-risk categories.  
26 *Psychological medicine* 2017:1-12. doi: 10.1017/S0033291717002537  
27  
28 26. Large M, Smith G, Sharma S, et al. Systematic review and meta-analysis of the  
29 clinical factors associated with the suicide of psychiatric in-patients. *Acta*  
30 *psychiatrica Scandinavica* 2011;124(1):18-29. doi: 10.1111/j.1600-  
31 0447.2010.01672.x  
32  
33  
34 27. Taylor Salisbury T, Killaspy H, King M. An international comparison of the  
35 deinstitutionalisation of mental health care: Development and findings of the  
36 Mental Health Services Deinstitutionalisation Measure (MENDit). *BMC*  
37 *psychiatry* 2016;16:54. doi: 10.1186/s12888-016-0762-4  
38  
39 28. Spaeth-Rublee B, Pincus HA, Silvestri F, et al. Measuring quality of mental health  
40 care: an international comparison. *International journal of environmental*  
41 *research and public health* 2014;11(10):10384-9. doi:  
42 10.3390/ijerph111010384  
43  
44 29. Berman AL, Silverman MM. Suicide risk assessment and risk formulation part II:  
45 suicide risk formulation and the determination of levels of risk. *Suicide and*  
46 *Life-Threatening Behavior* 2014;44(4):432-43.  
47  
48  
49 30. Turecki G, Brent DA. Suicide and suicidal behaviour. *The Lancet*  
50 2016;387(10024):1227-39.  
51  
52  
53  
54  
55  
56  
57  
58  
59  
60

- 1
- 2
- 3 31. Ryan CJ, Large MM. Suicide risk assessment: where are we now? *The Medical*
- 4 *journal of Australia* 2013;198(9):462-3.
- 5
- 6 32. Nordentoft M, Erlangsen A, Madsen T. Postdischarge Suicides: Nightmare and
- 7 Disgrace. *JAMA psychiatry* 2016;73(11):1113-14.
- 8
- 9 33. Olfson M, Marcus SC, Bridge JA. Focusing suicide prevention on periods of high
- 10 risk. *JAMA* 2014;311(11):1107-08.
- 11
- 12 34. Castelein S, Liemburg EJ, de Lange JS, et al. Suicide in Recent Onset Psychosis
- 13 Revisited: Significant Reduction of Suicide Rate over the Last Two Decades -
- 14 A Replication Study of a Dutch Incidence Cohort. *PLoS One*
- 15 2015;10(6):e0129263. doi: 10.1371/journal.pone.0129263
- 16
- 17 35. De Leo D, Heller T. Intensive case management in suicide attempters following
- 18 discharge from psychiatric care. *Australian journal of primary health*
- 19 2007;13(3):49-58.
- 20
- 21 36. Deisenhammer EA, Behrnt E-M, Kemmler G, et al. A comparison of suicides in
- 22 psychiatric in-patients, after discharge and in not recently hospitalized
- 23 individuals. *Comprehensive Psychiatry* 2016;69:100-05.
- 24
- 25 37. Erlangsen A, Zarit SH, Tu X, et al. Suicide among older psychiatric inpatients: an
- 26 evidence-based study of a high-risk group. *The American journal of geriatric*
- 27 *psychiatry* 2006;14(9):734-41.
- 28
- 29 38. Geddes JR, Juszcak E, O'Brien F, et al. Suicide in the 12 months after
- 30 discharge from psychiatric inpatient care, Scotland 1968-92. *Journal of*
- 31 *epidemiology and community health* 1997;51(4):430-34.
- 32
- 33 39. Goldacre M, Seagroatt V, Hawton K. Suicide after discharge from psychiatric
- 34 inpatient care. *The Lancet* 1993;342(8866):283-86.
- 35
- 36 40. Hayashi N, Igarashi M, Imai A, et al. Post-hospitalization course and predictive
- 37 signs of suicidal behavior of suicidal patients admitted to a psychiatric hospital:
- 38 a 2-year prospective follow-up study. *BMC psychiatry* 2012;12(1):1.
- 39
- 40 41. Healy D, Harris M, Tranter R, et al. Lifetime suicide rates in treated
- 41 schizophrenia: 1875–1924 and 1994–1998 cohorts compared. *The British*
- 42 *Journal of Psychiatry* 2006;188(3):223-28.
- 43
- 44 42. Isometsa E, Sund R, Pirkola S. Post-discharge suicides of inpatients with bipolar
- 45 disorder in Finland. *Bipolar Disord* 2014;16(8):867-74. doi: 10.1111/bdi.12237
- 46
- 47
- 48
- 49
- 50
- 51
- 52
- 53
- 54
- 55
- 56
- 57
- 58
- 59
- 60

- 1  
2  
3 43. Johansson LM, Johansson S-E, Sundquist J, et al. Suicide among psychiatric in-  
4 patients in Stockholm, Sweden. *Archives of Suicide Research* 1996;2(3):171-  
5 81. doi: 10.1080/13811119608258999  
6  
7  
8 44. Kessler RC, Warner CH, Ivany C, et al. Predicting Suicides After Psychiatric  
9 Hospitalization in US Army Soldiers: The Army Study to Assess Risk and  
10 Resilience in Servicemembers (Army STARRS). *JAMA psychiatry*  
11 2015;72(1):49-57. doi: 10.1001/jamapsychiatry.2014.1754 [published Online  
12 First: 2014/11/13]  
13  
14  
15 45. Lee HC, Lin HC. Are psychiatrist characteristics associated with postdischarge  
16 suicide of schizophrenia patients? *Schizophr Bull* 2009;35(4):760-5. doi:  
17 10.1093/schbul/sbn007  
18  
19  
20 46. Links P, Nisenbaum R, Ambreen M, et al. Prospective study of risk factors for  
21 increased suicide ideation and behavior following recent discharge. *Gen Hosp*  
22 *Psychiatry* 2012;34(1):88-97. doi: 10.1016/j.genhosppsy.2011.08.016  
23  
24 47. Luxton DD, Trofimovich L, Clark LL. Suicide risk among US Service members  
25 after psychiatric hospitalization, 2001-2011. *Psychiatr Serv* 2013;64(7):626-9.  
26 doi: 10.1176/appi.ps.201200413  
27  
28  
29 48. Madsen T, Nordentoft M. Changes in inpatient and postdischarge suicide rates in  
30 a nationwide cohort of Danish psychiatric inpatients, 1998-2005. *The Journal*  
31 *of clinical psychiatry* 2013;74(12):e1190-4. doi: 10.4088/JCP.13m08656  
32 [published Online First: 2014/01/18]  
33  
34  
35 49. Naik PC, Davies S, Buckley AM, et al. Long-term mortality after first psychiatric  
36 admission. *The British Journal of Psychiatry* 1997;170(1):43-46. doi:  
37 10.1192/bjp.170.1.43  
38  
39  
40  
41 50. Nyman AK, Jonsson H. Patterns of self-destructive behaviour in schizophrenia.  
42 *Acta Psychiatrica Scandinavica* 1986;73(3):252-62.  
43  
44  
45 51. Olfson M, Wall M, Wang S, et al. Short-term Suicide Risk After Psychiatric  
46 Hospital Discharge. *JAMA psychiatry* 2016 doi:  
47 10.1001/jamapsychiatry.2016.2035  
48  
49  
50 52. Park S, Choi JW, Kyoung Yi K, et al. Suicide mortality and risk factors in the 12  
51 months after discharge from psychiatric inpatient care in Korea: 1989-2006.  
52 *Psychiatry Res* 2013;208(2):145-50. doi: 10.1016/j.psychres.2012.09.039  
53  
54  
55  
56  
57  
58  
59

- 1  
2  
3 53. Pedersen CG, Jensen SOW, Gradus J, et al. Systematic suicide risk assessment  
4 for patients with schizophrenia: a national population-based study. *Psychiatric*  
5 *services* 2014  
6  
7  
8 54. Pirkola S, Sohlman B, Heilä H, et al. Reductions in postdischarge suicide after  
9 deinstitutionalization and decentralization: a nationwide register study in  
10 Finland. *Psychiatric Services* 2007  
11  
12 55. Pokorny AD. Prediction of suicide in psychiatric patients: report of a prospective  
13 study. *Archives of general psychiatry* 1983;40(3):249-57.  
14  
15 56. Qurashi I, Kapur N, Appleby L. A prospective study of noncompliance with  
16 medication, suicidal ideation, and suicidal behavior in recently discharged  
17 psychiatric inpatients. *Arch Suicide Res* 2006;10(1):61-7. doi:  
18 10.1080/13811110500318455  
19  
20 57. Riblet N, Shiner B, Watts BV, et al. Death by Suicide Within 1 Week of Hospital  
21 Discharge: A Retrospective Study of Root Cause Analysis Reports. *The*  
22 *Journal of nervous and mental disease* 2017;205(6):436-42. doi:  
23 10.1097/NMD.0000000000000687  
24  
25 58. Ruengorn C, Sanichwankul K, Niwatananun W, et al. Incidence and risk factors  
26 of suicide reattempts within 1 year after psychiatric hospital discharge in mood  
27 disorder patients. *Clin Epidemiol* 2011;3:305-13. doi: 10.2147/CLEP.S25444  
28  
29 59. Sani G, Tondo L, Koukopoulos A, et al. Suicide in a large population of former  
30 psychiatric inpatients. *Psychiatry and clinical neurosciences* 2011;65(3):286-  
31 95. doi: 10.1111/j.1440-1819.2011.02205.x  
32  
33 60. Seemuller F, Meier S, Obermeier M, et al. Three-Year long-term outcome of 458  
34 naturalistically treated inpatients with major depressive episode: severe  
35 relapse rates and risk factors. *Eur Arch Psychiatry Clin Neurosci*  
36 2014;264(7):567-75. doi: 10.1007/s00406-014-0495-7  
37  
38 61. Tejedor M, Diaz A, Castillon J, et al. Attempted suicide: repetition and survival  
39 findings of a follow-up study. *Acta Psychiatrica Scandinavica* 1999;100(3):205-  
40 11.  
41  
42 62. Tsai S-YM, Kuo C-J, Lee H-C. Risk factors for completed suicide in bipolar  
43 disorder. *The Journal of clinical psychiatry* 2002;63(6):469-76.  
44  
45 63. Tseng M-C, Cheng I-C, Lee Y-J, et al. Intermediate-term outcome of psychiatric  
46 inpatients with major depression. *J Formos Med Assoc* 2006;105(8):645-52.  
47  
48  
49  
50  
51  
52  
53  
54  
55  
56  
57  
58  
59  
60

- 1  
2  
3 64. Valenstein M, Kim HM, Ganoczy D, et al. Higher-risk periods for suicide among  
4 VA patients receiving depression treatment: prioritizing suicide prevention  
5 efforts. *J Affect Disord* 2009;112(1-3):50-8. doi: 10.1016/j.jad.2008.08.020  
6  
7  
8 65. Winkler P, Mlada K, Csemy L, et al. Suicides following inpatient psychiatric  
9 hospitalization: A nationwide case control study. *J Affect Disord* 2015;184:164-  
10 9. doi: 10.1016/j.jad.2015.05.039  
11  
12 66. Yim PH, Yip PS, Li RH, et al. Suicide after discharge from psychiatric inpatient  
13 care: a case-control study in Hong Kong. *The Australian and New Zealand*  
14 *journal of psychiatry* 2004;38(1-2):65-72. doi: 10.1177/000486740403800103  
15  
16  
17  
18  
19  
20  
21  
22  
23  
24  
25  
26  
27  
28  
29  
30  
31  
32  
33  
34  
35  
36  
37  
38  
39  
40  
41  
42  
43  
44  
45  
46  
47  
48  
49  
50  
51  
52  
53  
54  
55  
56  
57  
58  
59  
60

Table

| Table 1. List of included studies        |                                                     |           |                                    |                             |            |                            |                             |
|------------------------------------------|-----------------------------------------------------|-----------|------------------------------------|-----------------------------|------------|----------------------------|-----------------------------|
| Study                                    | Location                                            | Period    | Suicide Ascertainment              | Type of Patient             | Discharges | Suicides in the first week | Suicides on the first month |
| Castelein et al., (2015) <sup>34</sup>   | Psychiatric hospitals in Groningen, the Netherlands | 2000-2011 | Regional psychiatric case register | Recent onset psychosis      | 424        | 1                          | -                           |
| De Leo & Heller (2007) <sup>35</sup>     | Gold Coast Hospital, Queensland, Australia          | 2002-2005 | Not specified                      | Previous suicide attempters | 60         | 0                          | 0                           |
| Deisenhammer et al. (2016) <sup>36</sup> | Three psychiatric hospitals, Tyrol, Austria         | 2004-2011 | Not specified                      | Unselected adults           | 65,652     | 25                         | 51                          |
| Erlangsen (2006) <sup>37</sup>           | All psychiatric hospitals, Denmark                  | 1990-2001 | Coronial records                   | Adults aged >60 years       | 72,701     | 77                         | -                           |
| Geddes et al. (1997) <sup>38</sup>       | All psychiatric hospitals,                          | 1968-1993 | Coronial records                   | Unselected adults           | 338,013    | -                          | 367                         |



|                                      |                                                           |           |                  |                              |        |    |     |
|--------------------------------------|-----------------------------------------------------------|-----------|------------------|------------------------------|--------|----|-----|
|                                      | Scotland,<br>UK                                           |           |                  |                              |        |    |     |
| Goldacre et al. (1993) <sup>39</sup> | Hospitals within the Oxford Regional Health Authority, UK | 1979-1986 | Coronial records | Unselected adults            | 26,864 | -  | 44  |
| Hayashi et al. (2012) <sup>40</sup>  | Tokyo Metropolitan Matsuzawa Hospital, Japan              | 2006-2009 | Not specified    | Admitted suicidal patients   | 3,450  | -  | 0   |
| Healy et al. (2006) <sup>41</sup>    | Unspecified hospitals, North Wales UK                     | 1994-2003 | Coronial records | Psychotic patients           | 133    | -  | 2   |
| Ho (2003) <sup>5</sup>               | All psychiatric wards and hospitals in Hong Kong, China   | 1997-2000 | Coronial records | Unselected adults            | 21,921 | -  | 124 |
| Isometsa (2014) <sup>42</sup>        | All psychiatric wards and hospitals, Finland              | 1987-2004 | Coronial records | Adults with bipolar disorder | 52,747 | 53 | 158 |



|                                          |                                                          |           |                  |                                                       |         |     |     |
|------------------------------------------|----------------------------------------------------------|-----------|------------------|-------------------------------------------------------|---------|-----|-----|
| Johansson (1996) <sup>43</sup>           | All psychiatric inpatients in southern Stockholm, Sweden | 1984-1985 | Coronial records | Unselected adults                                     | 3,862   | 4   | 12  |
| Kessler et al. (2015) <sup>44</sup>      | US Army psychiatric hospitals and wards, USA             | 2004-2009 | Coronial records | US army psychiatric patients                          | 53,769  | 5   | 17  |
| Lee & Lin (2009) <sup>45</sup>           | All psychiatric wards and hospitals in Taiwan            | 2001-2005 | Coronial records | Patients with schizophrenia                           | 435     | 22  | 39  |
| Links et al. (2012) <sup>46</sup>        | St Michael's Hospital, Toronto, Canada                   | 2007-2009 | Not specified    | Patients with previous suicidal behaviour or ideation | 120     | -   | 3   |
| Luxton et al. (2013) <sup>47</sup>       | US Military treatment facilities, USA                    | 2001-2011 | Coronial records | US service members                                    | 68,947  | -   | 35  |
| Madsen & Nordentoft (2013) <sup>48</sup> | All psychiatric wards and hospitals in                   | 1998-2006 | Coronial records | Unselected adults                                     | 287,866 | 175 | 374 |

|                                      |                                                  |           |                                          |                             |         |       |       |
|--------------------------------------|--------------------------------------------------|-----------|------------------------------------------|-----------------------------|---------|-------|-------|
|                                      | Denmark                                          |           |                                          |                             |         |       |       |
| Naik et al. (1997) <sup>49</sup>     | Saxondale Hospital, Nottinghamshire, England, UK | 1974-1992 | Local registers and NHS central register | Unselected adults           | 86      | -     | 0     |
| Nyman (1986) <sup>50</sup>           | Unspecified psychiatric hospital, Sweden         | 1964-1968 | Coronial records                         | Patients with schizophrenia | 110     |       | 0     |
| Olfson (2016) <sup>51</sup>          | Psychiatric patients from 45 American states     | 2001-2008 | Coronial records                         | Unselected adults           | 770,643 | 49    | 151   |
| Park et al. (2013) <sup>52</sup>     | Asan Medical Center, Seoul, South Korea          | 1989-2006 | Coronial records                         | Unselected adults           | 8,403   | 10    | 26    |
| Pedersen et al. (2014) <sup>53</sup> | All psychiatric hospitals and wards in Denmark   | 2005-2010 | Coronial records                         | Patients with schizophrenia | 7,107   | 6     | -     |
| Pirkola et al. (2007) <sup>54</sup>  | All psychiatric hospitals                        | 1985-2001 | Coronial records                         | Unselected adults           | 355,000 | 1,164 | 1,698 |

|                                            |                                                                                |                  |                     |                                                                    |               |     |    |
|--------------------------------------------|--------------------------------------------------------------------------------|------------------|---------------------|--------------------------------------------------------------------|---------------|-----|----|
|                                            | and wards<br>in Finland                                                        |                  |                     |                                                                    |               |     |    |
| Pokorny<br>(1983) <sup>55</sup>            | Houston<br>Veterans<br>Administrati<br>on Medical<br>Centre,<br>Texas, USA     | Not<br>specified | Coronial<br>records | Veterans<br>administrati<br>on patients                            | 4,800         | 10  | 16 |
| Qurashi et<br>al. (2006)<br><sup>56</sup>  | Unspecified<br>hospital,<br>Manchester<br>, England,<br>UK                     | Not<br>specified | Not specified       | Unselected<br>adults                                               | 69            | 1   | -  |
| Riblet<br>(2017)<br><sup>57</sup>          | All<br>American<br>Veteran<br>Health<br>mental<br>health<br>inpatient<br>units | 2002-<br>2015    | Coronial<br>records | Unselected<br>American<br>service-<br>people                       | 1,126,17<br>9 | 141 | -  |
| Ruengorn<br>et al. (2011)<br><sup>58</sup> | Suanprung<br>Psychiatric<br>Hospital,<br>Chiang Mai,<br>Thailand               | 2007-<br>2010    | Hospital<br>records | Mood<br>disorder<br>patients<br>admitted for<br>suicide<br>attempt | 235           | 1   | 1  |
| Sani et al.<br>(2011) <sup>59</sup>        | Belvedere<br>Montello<br>Hospital,                                             | 1964-<br>1998    | Coronial<br>records | Unselected<br>adults                                               | 4,441         | 2   | -  |

|                                       |                                                                             |               |                  |                                       |         |     |     |
|---------------------------------------|-----------------------------------------------------------------------------|---------------|------------------|---------------------------------------|---------|-----|-----|
|                                       | Rome, Italy                                                                 |               |                  |                                       |         |     |     |
| Seemuller et al. (2014) <sup>60</sup> | Twelve centres across Germany                                               | Not specified | Study follow up  | Patients with major depression        | 1,014   | 1   | 1   |
| Tejedor et al. (1999) <sup>61</sup>   | Psychiatric Department of Santa Cruz y San Pablo Hospital, Barcelona, Spain | 1983-1997     | Study follow up  | Suicide attempters                    | 150     | 0   | 1   |
| Tsai (2002) <sup>62</sup>             | Taipei City Psychiatric Center, Taiwan                                      | 1985-1997     | Coronial Records | Patients with mood disorders          | 2,133   | 0   | 24  |
| Tseng et al. (2006) <sup>63</sup>     | Unspecified psychosomatic ward, Taiwan                                      | 2000-2002     | Study follow up  | Patients with major depression        | 67      |     | 2   |
| Valenstein (2009) <sup>64</sup>       | All US veteran psychiatric inpatient facilities                             | 1999-2004     | Coronial data    | American veterans with mood disorders | 184,093 | 50  | 127 |
| Winkler et al. (2015) <sup>65</sup>   | All psychiatric hospitals and                                               | 2006-2012     | Coronial records | Unselected adults                     | 137,290 | 131 | 258 |

|                             |                                                                    |               |                     |                      |       |   |    |
|-----------------------------|--------------------------------------------------------------------|---------------|---------------------|----------------------|-------|---|----|
|                             | psychiatric<br>wards,<br>Czech<br>Republic                         |               |                     |                      |       |   |    |
| Yim (2004)<br><sup>66</sup> | Pamela<br>Youde<br>Nethersole<br>Eastern<br>Hospital,<br>Hong Kong | 1996-<br>1999 | Coronial<br>records | Unselected<br>adults | 6,292 | - | 20 |

1  
2  
3  
4  
5  
6 **Figures 1-3**  
7

8  
9 **Figure 1. Prisma Flow Chart**  
10

11  
12 **Figure 2. Forrest Plot of suicide rates in one month following discharge from**  
13 **psychiatric hospitalisation**  
14

15  
16  
17 **Figure 3. Forrest Plot of suicide rates in one week following discharge from**  
18 **psychiatric hospitalisation**  
19  
20  
21  
22  
23  
24  
25  
26  
27  
28  
29  
30  
31  
32  
33  
34  
35  
36  
37  
38  
39  
40  
41  
42  
43  
44  
45  
46  
47  
48  
49  
50  
51  
52  
53  
54  
55  
56  
57  
58  
59  
60

**eSupplements 1-9**

1. Strength of reporting items of included studies
2. Suicide rates in one month following discharge from psychiatric hospitalisation
3. Suicide rates in one week following discharge from psychiatric hospitalisation
4. Suicide rates in one month following discharge from psychiatric hospitalisation with gender subgroups.
5. Forest Plot of studies reporting suicides by men and women in one month following discharge from psychiatric hospitalisation
6. Suicide rates in one week and two-four weeks following discharge from psychiatric hospitalisation
7. Forrest Plot Suicide rates in one week and two-four weeks following discharge from psychiatric hospitalisation
8. Funnel Plot of Suicide rates in one month following discharge from psychiatric hospitalisation
9. Funnel Plot of Suicide rates in one week following discharge from psychiatric hospitalisation

1  
2  
3  
4  
5  
6  
7  
8  
9  
10  
11  
12  
13  
14  
15  
16  
17  
18  
19  
20  
21  
22  
23  
24  
25  
26  
27  
28  
29  
30  
31  
32  
33  
34  
35  
36  
37  
38  
39  
40  
41  
42  
43  
44  
45  
46  
47  
48  
49  
50  
51  
52  
53  
54  
55  
56  
57  
58  
59  
60

Figure 1. Prisma Flow Chart

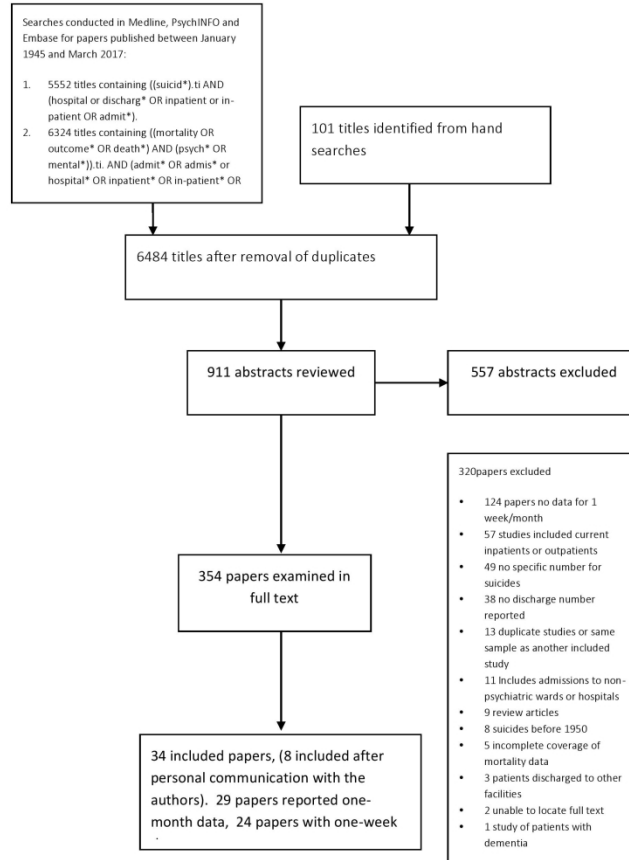

Figure 1. Figure 1. Prisma Flow Chart of Searches

209x297mm (300 x 300 DPI)



1  
2  
3  
4  
5  
6  
7  
8  
9  
10  
11  
12  
13  
14  
15  
16  
17  
18  
19  
20  
21  
22  
23  
24  
25  
26  
27  
28  
29  
30  
31  
32  
33  
34  
35  
36  
37  
38  
39  
40  
41  
42  
43  
44  
45  
46  
47  
48  
49  
50  
51  
52  
53  
54  
55  
56  
57  
58  
59  
60

Figure 2. Forrest Plot of suicide rates in one month following discharge from psychiatric hospitalisation

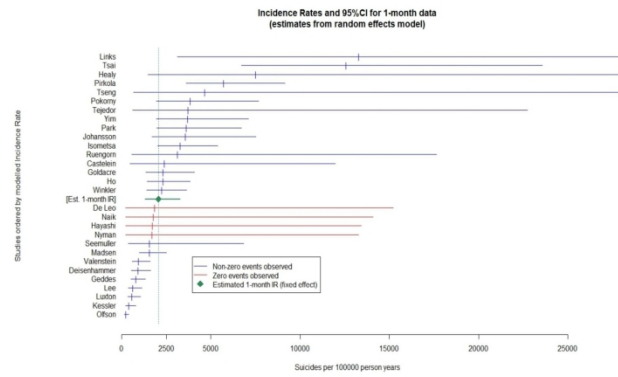

Figure 2. Forrest Plot of suicide rates in one month following discharge from psychiatric hospitalisation

209x297mm (300 x 300 DPI)

Figure 3. Forrest Plot of suicide rates in one week following discharge from psychiatric hospitalisation

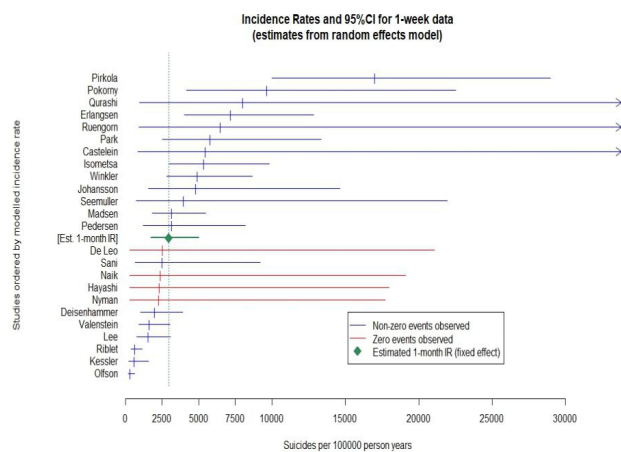

Figure 3. Forrest Plot of suicide rates in one week following discharge from psychiatric hospitalisation

209x297mm (150 x 150 DPI)

1  
2  
3  
4  
5  
6  
7  
8  
9  
10  
11  
12  
13  
14  
15  
16  
17  
18  
19  
20  
21  
22  
23  
24  
25  
26  
27  
28  
29  
30  
31  
32  
33  
34  
35  
36  
37  
38  
39  
40  
41  
42  
43  
44  
45  
46

| eSupplement 1. Strength of reporting items of included studies |                   |                   |                    |                              |                             |
|----------------------------------------------------------------|-------------------|-------------------|--------------------|------------------------------|-----------------------------|
| Study name                                                     | Coronial Verdicts | Counts admissions | Defined Population | Includes Undetermined deaths | Strength of Reporting Score |
| Castelein 2015                                                 | 0                 | 0                 | 1                  | 0                            | 1                           |
| De Leo 2007                                                    | 0                 | 0                 | 0                  | 0                            | 1                           |
| Erlangsen 2006                                                 | 1                 | 0                 | 1                  | 0                            | 2                           |
| Deisenhammer 2016                                              | 1                 | 1                 | 1                  | 0                            | 3                           |
| Geddes 1997                                                    | 1                 | 0                 | 1                  | 1                            | 3                           |
| Goldacre 1993                                                  | 1                 | 1                 | 1                  | 1                            | 4                           |
| Hayashi 2012                                                   | 0                 | 0                 | 0                  | 0                            | 0                           |
| Healy 2006                                                     | 1                 | 0                 | 1                  | 0                            | 2                           |
| Ho 2003                                                        | 1                 | 0                 | 1                  | 1                            | 3                           |
| Isometsa 2014                                                  | 1                 | 1                 | 1                  | 0                            | 3                           |
| Johansson 1996                                                 | 1                 | 0                 | 0                  | 1                            | 2                           |
| Kessler 2015                                                   | 1                 | 1                 | 1                  | 0                            | 3                           |
| Lee 2009                                                       | 1                 | 1                 | 1                  | 0                            | 3                           |
| Links 2012                                                     | 0                 | 0                 | 0                  | 0                            | 0                           |
| Luxton 2013                                                    | 1                 | 0                 | 1                  | 0                            | 2                           |
| Madsen 2013                                                    | 1                 | 0                 | 1                  | 0                            | 2                           |
| Naik 1997                                                      | 1                 | 0                 | 0                  | 0                            | 1                           |
| Nyman 1986                                                     | 1                 | 1                 | 0                  | 0                            | 2                           |
| Olfson 2016                                                    | 1                 | 0                 | 1                  | 0                            | 2                           |
| Park 2013                                                      | 1                 | 0                 | 0                  | 0                            | 1                           |
| Pedersen                                                       | 1                 | 0                 | 1                  | 0                            | 2                           |
| Pirkola 2007                                                   | 1                 | 0                 | 1                  | 0                            | 2                           |
| Pokorny 1983                                                   | 1                 | 0                 | 0                  | 0                            | 1                           |
| Qurashi 2006                                                   | 0                 | 0                 | 0                  | 0                            | 0                           |
| Riblet 2017                                                    | 1                 | 1                 | 1                  | 0                            | 3                           |
| Ruengorn 2011                                                  | 0                 | 0                 | 0                  | 0                            | 0                           |
| Sani 2011                                                      | 1                 | 0                 | 0                  | 0                            | 1                           |
| Seemuller 2014                                                 | 0                 | 0                 | 0                  | 0                            | 0                           |

|                 |   |   |   |   |   |
|-----------------|---|---|---|---|---|
| Tejedor 1999    | 0 | 0 | 0 | 0 | 0 |
| Tsai 2002       | 0 | 0 | 0 | 0 | 0 |
| Tseng 2006      | 0 | 0 | 0 | 0 | 0 |
| Valenstein 2009 | 1 | 0 | 1 | 0 | 2 |
| Winkler 2015    | 1 | 0 | 1 | 0 | 2 |
| Yim2004         | 1 | 0 | 1 | 1 | 3 |

| eSupplement 2 – Suicide rates in one month following discharge from psychiatric hospitalisation |              |          |          |            |        |        |
|-------------------------------------------------------------------------------------------------|--------------|----------|----------|------------|--------|--------|
| Study                                                                                           | PY           | Suicides | Observed | Fitted     | LL     | UL     |
| Castelein                                                                                       | 36.01        | 1        | 0.0278   | 0.024<br>0 | 0.0048 | 0.1196 |
| De Leo                                                                                          | 5.00         | 0        | 0.0000   | 0.018<br>6 | 0.0023 | 0.1521 |
| Deisenhammer                                                                                    | 5471.00      | 51       | 0.0093   | 0.009<br>5 | 0.0055 | 0.0162 |
| Geddes                                                                                          | 44634.2<br>0 | 367      | 0.0082   | 0.008<br>2 | 0.0051 | 0.0132 |
| Goldacre                                                                                        | 1875.00      | 44       | 0.0235   | 0.023<br>4 | 0.0134 | 0.0407 |
| Hayashi                                                                                         | 8.83         | 0        | 0.0000   | 0.017<br>4 | 0.0023 | 0.1342 |
| Healy                                                                                           | 11.08        | 2        | 0.1805   | 0.075<br>1 | 0.0149 | 0.3795 |
| Ho                                                                                              | 5314.00      | 124      | 0.0233   | 0.023<br>3 | 0.0142 | 0.0383 |
| Isometsa                                                                                        | 4769.00      | 158      | 0.0331   | 0.033<br>0 | 0.0202 | 0.0540 |
| Johansson                                                                                       | 321.00       | 12       | 0.0374   | 0.035<br>8 | 0.0171 | 0.0753 |

|    |            |                      |      |        |                    |        |        |
|----|------------|----------------------|------|--------|--------------------|--------|--------|
| 1  | Kessler    | 4480.75              | 17   | 0.0038 | 0.004 <sub>1</sub> | 0.0021 | 0.0079 |
| 2  |            |                      |      |        |                    |        |        |
| 3  | Lee        | 6250.00              | 39   | 0.0062 | 0.006 <sub>4</sub> | 0.0037 | 0.0112 |
| 4  |            |                      |      |        |                    |        |        |
| 5  | Links      | 9.92                 | 3    | 0.3025 | 0.132 <sub>9</sub> | 0.0312 | 0.5653 |
| 6  |            |                      |      |        |                    |        |        |
| 7  |            |                      |      |        |                    |        |        |
| 8  | Luxton     | 6050.13              | 35   | 0.0058 | 0.006 <sub>0</sub> | 0.0034 | 0.0106 |
| 9  |            |                      |      |        |                    |        |        |
| 10 | Madsen     | 23911.9 <sub>2</sub> | 374  | 0.0156 | 0.015 <sub>7</sub> | 0.0097 | 0.0252 |
| 11 |            |                      |      |        |                    |        |        |
| 12 | Naik       | 7.25                 | 0    | 0.0000 | 0.017 <sub>9</sub> | 0.0023 | 0.1409 |
| 13 |            |                      |      |        |                    |        |        |
| 14 | Nyman      | 9.17                 | 0    | 0.0000 | 0.017 <sub>3</sub> | 0.0023 | 0.1328 |
| 15 |            |                      |      |        |                    |        |        |
| 16 | Olfson     | 63288.6 <sub>0</sub> | 151  | 0.0024 | 0.002 <sub>4</sub> | 0.0015 | 0.0039 |
| 17 |            |                      |      |        |                    |        |        |
| 18 | Park       | 700.25               | 26   | 0.0371 | 0.036 <sub>4</sub> | 0.0198 | 0.0670 |
| 19 |            |                      |      |        |                    |        |        |
| 20 | Pirkola    | 29583.3 <sub>3</sub> | 1698 | 0.0574 | 0.057 <sub>4</sub> | 0.0360 | 0.0914 |
| 21 |            |                      |      |        |                    |        |        |
| 22 | Pokorny    | 400.00               | 16   | 0.0400 | 0.038 <sub>6</sub> | 0.0194 | 0.0766 |
| 23 |            |                      |      |        |                    |        |        |
| 24 | Ruengorn   | 19.58                | 1    | 0.0511 | 0.031 <sub>5</sub> | 0.0056 | 0.1763 |
| 25 |            |                      |      |        |                    |        |        |
| 26 | Seemuller  | 79.25                | 1    | 0.0126 | 0.015 <sub>7</sub> | 0.0036 | 0.0683 |
| 27 |            |                      |      |        |                    |        |        |
| 28 | Tejedor    | 12.50                | 1    | 0.0800 | 0.037 <sub>3</sub> | 0.0061 | 0.2272 |
| 29 |            |                      |      |        |                    |        |        |
| 30 | Tsai       | 177.75               | 24   | 0.1350 | 0.125 <sub>8</sub> | 0.0672 | 0.2357 |
| 31 |            |                      |      |        |                    |        |        |
| 32 | Tseng      | 5.58                 | 1    | 0.1791 | 0.046 <sub>8</sub> | 0.0066 | 0.3289 |
| 33 |            |                      |      |        |                    |        |        |
| 34 | Valenstein | 13149.4 <sub>7</sub> | 127  | 0.0097 | 0.009 <sub>7</sub> | 0.0059 | 0.0160 |
| 35 |            |                      |      |        |                    |        |        |
| 36 | Winkler    | 11440.8              | 258  | 0.0226 | 0.022              | 0.0140 | 0.0364 |
| 37 |            |                      |      |        |                    |        |        |
| 38 |            |                      |      |        |                    |        |        |
| 39 |            |                      |      |        |                    |        |        |
| 40 |            |                      |      |        |                    |        |        |
| 41 |            |                      |      |        |                    |        |        |
| 42 |            |                      |      |        |                    |        |        |
| 43 |            |                      |      |        |                    |        |        |
| 44 |            |                      |      |        |                    |        |        |
| 45 |            |                      |      |        |                    |        |        |
| 46 |            |                      |      |        |                    |        |        |

|     |        |    |        |            |        |        |
|-----|--------|----|--------|------------|--------|--------|
|     | 3      |    |        | 5          |        |        |
| Yim | 524.33 | 20 | 0.0381 | 0.037<br>1 | 0.0194 | 0.0710 |

For peer review only

1  
2  
3  
4  
5  
6  
7  
8  
9  
10  
11  
12  
13  
14  
15  
16  
17  
18  
19  
20  
21  
22  
23  
24  
25  
26  
27  
28  
29  
30  
31  
32  
33  
34  
35  
36  
37  
38  
39  
40  
41  
42  
43  
44  
45  
46

eSupplement 3. Suicide rates in one week following discharge from psychiatric hospitalisation

| Study        | PY       | Observed | Observed | Fitted | LL     | UL     |
|--------------|----------|----------|----------|--------|--------|--------|
| Castelein    | 8.14     | 1        | 0.1229   | 0.0548 | 0.0085 | 0.3523 |
| DeLeo        | 5.00     | 0        | 0.0000   | 0.0255 | 0.0031 | 0.2109 |
| Deisenhammer | 1262.54  | 25       | 0.0198   | 0.0201 | 0.0103 | 0.0390 |
| Erlangen     | 1058.72  | 77       | 0.0727   | 0.0720 | 0.0404 | 0.1283 |
| Hayashi      | 8.83     | 0        | 0.0000   | 0.0234 | 0.0030 | 0.1796 |
| Isometsa     | 974.00   | 53       | 0.0544   | 0.0539 | 0.0296 | 0.0980 |
| Johansson    | 74.08    | 4        | 0.0540   | 0.0481 | 0.0158 | 0.1461 |
| Kessler      | 1034.00  | 5        | 0.0048   | 0.0062 | 0.0024 | 0.0157 |
| Lee          | 1442.00  | 22       | 0.0153   | 0.0156 | 0.0079 | 0.0308 |
| Madsen       | 5518.13  | 175      | 0.0317   | 0.0317 | 0.0183 | 0.0550 |
| Naik         | 7.25     | 0        | 0.0000   | 0.0242 | 0.0031 | 0.1911 |
| Nyman        | 9.17     | 0        | 0.0000   | 0.0232 | 0.0030 | 0.1773 |
| Olfson       | 14776.80 | 49       | 0.0033   | 0.0034 | 0.0019 | 0.0063 |
| Park         | 161.60   | 10       | 0.0619   | 0.0581 | 0.0253 | 0.1336 |
| Pedersen     | 187.40   | 6        | 0.0320   | 0.0317 | 0.0123 | 0.0819 |
| Pirkola      | 6826.92  | 1164     | 0.1705   | 0.1703 | 0.1001 | 0.2896 |
| Pokorny      | 92.30    | 10       | 0.1083   | 0.0968 | 0.0417 | 0.2252 |
| Qurashi      | 1.33     | 1        | 0.7536   | 0.0803 | 0.0095 | 0.6766 |

|            |          |     |        |        |        |        |
|------------|----------|-----|--------|--------|--------|--------|
| Riblet     | 21657.30 | 141 | 0.0065 | 0.0066 | 0.0038 | 0.0115 |
| Ruengorn   | 4.52     | 1   | 0.2212 | 0.0650 | 0.0091 | 0.4651 |
| Sani       | 85.31    | 2   | 0.0234 | 0.0251 | 0.0069 | 0.0919 |
| Seemuller  | 18.29    | 1   | 0.0547 | 0.0399 | 0.0073 | 0.2194 |
| Valenstein | 3026.18  | 50  | 0.0165 | 0.0167 | 0.0091 | 0.0304 |
| Winkler    | 2640.19  | 131 | 0.0496 | 0.0494 | 0.0283 | 0.0863 |

eSupplement 4 – Suicide rates in one month following discharge from psychiatric hospitalisation with gender subgroups.

| Study        | Sex | PY       | Suicides | Residual | Observed | Fitted | LL     | UL     |
|--------------|-----|----------|----------|----------|----------|--------|--------|--------|
| Castelein    | F   | 10.36    | 0        | -0.447   | 0.0000   | 0.0096 | 0.0019 | 0.0491 |
| Castelein    | M   | 25.65    | 1        | 0.646    | 0.0390   | 0.0188 | 0.0039 | 0.0921 |
| Deisenhammer | F   | 3006.00  | 20       | 0.026    | 0.0067   | 0.0066 | 0.0033 | 0.0133 |
| Deisenhammer | M   | 2465.00  | 31       | -0.045   | 0.0126   | 0.0127 | 0.0066 | 0.0246 |
| Geddes       | F   | 24113.30 | 171      | 0.477    | 0.0071   | 0.0068 | 0.0037 | 0.0128 |
| Geddes       | M   | 20520.90 | 196      | -0.456   | 0.0096   | 0.0099 | 0.0055 | 0.0178 |
| Goldacre     | F   | 1072.00  | 16       | -0.205   | 0.0149   | 0.0158 | 0.0077 | 0.0322 |
| Goldacre     | M   | 803.00   | 28       | 0.383    | 0.0349   | 0.0323 | 0.0165 | 0.0633 |
| Ho           | F   | 2582.00  | 53       | 0.830    | 0.0205   | 0.0184 | 0.0095 | 0.0354 |
| Ho           | M   | 2732.00  | 71       | -0.543   | 0.0260   | 0.0276 | 0.0149 | 0.0512 |
| Isometsa     | F   | 2614.00  | 52       | -0.352   | 0.0199   | 0.0209 | 0.0110 | 0.0400 |
| Isometsa     | M   | 2155.00  | 106      | 0.413    | 0.0492   | 0.0471 | 0.0256 | 0.0867 |
| Kessler      | F   | 887.64   | 0        | -2.004   | 0.0000   | 0.0022 | 0.0010 | 0.0050 |
| Kessler      | M   | 3593.11  | 17       | 0.096    | 0.0047   | 0.0046 | 0.0021 | 0.0101 |
| Madsen       | F   | 12533.41 | 125      | -0.171   | 0.0100   | 0.0101 | 0.0054 | 0.0189 |



|            |   |          |     |        |        |        |        |        |
|------------|---|----------|-----|--------|--------|--------|--------|--------|
| Madsen     | M | 11378.51 | 249 | 0.157  | 0.0219 | 0.0217 | 0.0120 | 0.0391 |
| Olfson     | F | 35113.50 | 58  | -0.181 | 0.0017 | 0.0017 | 0.0009 | 0.0032 |
| Olfson     | M | 28175.10 | 93  | -0.069 | 0.0033 | 0.0033 | 0.0018 | 0.0061 |
| Valenstein | F | 1065.11  | 2   | -1.504 | 0.0019 | 0.0046 | 0.0023 | 0.0092 |
| Valenstein | M | 12084.36 | 125 | 0.215  | 0.0103 | 0.0101 | 0.0053 | 0.0196 |

**eSupplement 5. Forest Plot of studies reporting suicides by men and women in one month following discharge from psychiatric hospitalisation**

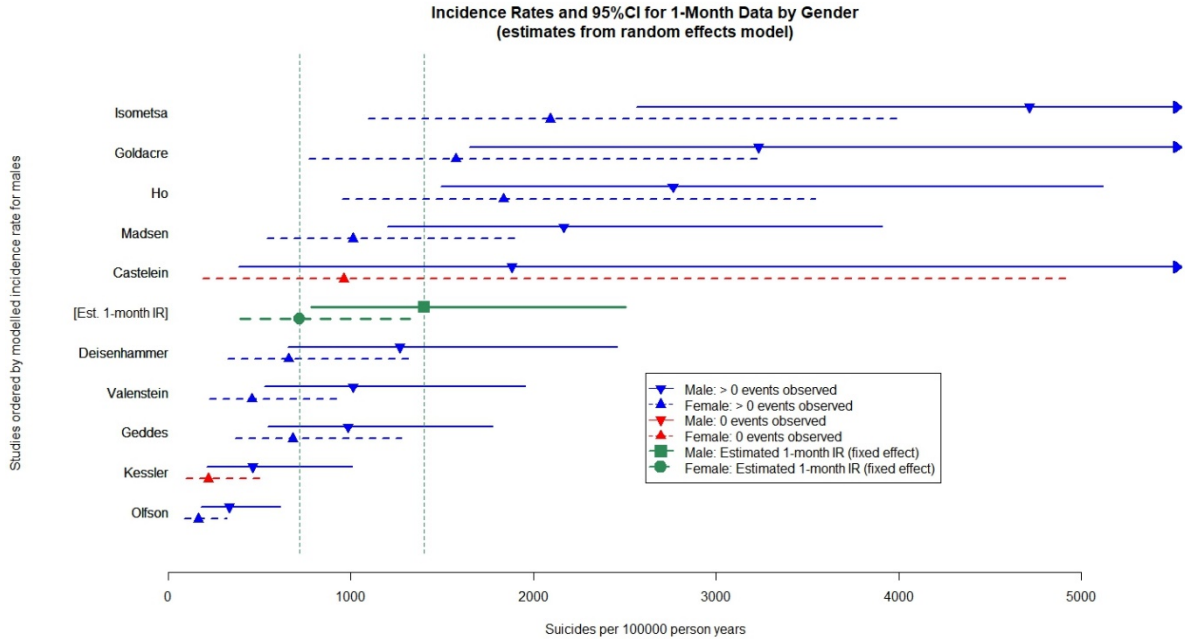

**eSupplement 6. Suicide rates in one week and two-four weeks following discharge from psychiatric hospitalisation**

| Study | Week | PY | Observed | IR Observed | IR Fitted | LL | UL |
|-------|------|----|----------|-------------|-----------|----|----|
|-------|------|----|----------|-------------|-----------|----|----|

|    |              |     |          |      |        |        |        |        |
|----|--------------|-----|----------|------|--------|--------|--------|--------|
| 1  | Castelein    | 1   | 8.14     | 1    | 0.1229 | 0.0475 | 0.0074 | 0.3028 |
| 2  | Castelein    | 2-4 | 27.88    | 0    | 0.0000 | 0.0137 | 0.0035 | 0.0532 |
| 3  |              |     |          |      |        |        |        |        |
| 4  | Deisenhammer | 1   | 1262.54  | 25   | 0.0198 | 0.0192 | 0.0089 | 0.0413 |
| 5  | Deisenhammer | 2-4 | 4208.46  | 26   | 0.0062 | 0.0066 | 0.0038 | 0.0114 |
| 6  |              |     |          |      |        |        |        |        |
| 7  | Isometsa     | 1   | 974.00   | 53   | 0.0544 | 0.0582 | 0.0294 | 0.1153 |
| 8  | Isometsa     | 2-4 | 3795.00  | 105  | 0.0277 | 0.0261 | 0.0154 | 0.0443 |
| 9  |              |     |          |      |        |        |        |        |
| 10 | Johansson    | 1   | 74.08    | 4    | 0.0540 | 0.0688 | 0.0246 | 0.1923 |
| 11 | Johansson    | 2-4 | 246.92   | 8    | 0.0324 | 0.0223 | 0.0112 | 0.0444 |
| 12 |              |     |          |      |        |        |        |        |
| 13 | Kessler      | 1   | 1034.00  | 5    | 0.0048 | 0.0063 | 0.0025 | 0.0160 |
| 14 | Kessler      | 2-4 | 3446.75  | 12   | 0.0035 | 0.0034 | 0.0018 | 0.0064 |
| 15 |              |     |          |      |        |        |        |        |
| 16 | Lee          | 1   | 1442.00  | 22   | 0.0153 | 0.0138 | 0.0063 | 0.0305 |
| 17 | Lee          | 2-4 | 4808.00  | 17   | 0.0035 | 0.0043 | 0.0025 | 0.0076 |
| 18 |              |     |          |      |        |        |        |        |
| 19 | Madsen       | 1   | 5518.13  | 175  | 0.0317 | 0.0317 | 0.0166 | 0.0605 |
| 20 | Madsen       | 2-4 | 18393.79 | 199  | 0.0108 | 0.0108 | 0.0064 | 0.0181 |
| 21 |              |     |          |      |        |        |        |        |
| 22 | Olfson       | 1   | 14776.80 | 49   | 0.0033 | 0.0034 | 0.0017 | 0.0068 |
| 23 | Olfson       | 2-4 | 48511.80 | 102  | 0.0021 | 0.0021 | 0.0012 | 0.0036 |
| 24 |              |     |          |      |        |        |        |        |
| 25 | Park         | 1   | 161.60   | 10   | 0.0619 | 0.0711 | 0.0299 | 0.1691 |
| 26 | Park         | 2-4 | 538.65   | 16   | 0.0297 | 0.0240 | 0.0132 | 0.0435 |
| 27 |              |     |          |      |        |        |        |        |
| 28 | Pirkola      | 1   | 6826.92  | 1164 | 0.1705 | 0.1698 | 0.0909 | 0.3173 |
| 29 | Pirkola      | 2-4 | 22756.41 | 534  | 0.0235 | 0.0237 | 0.0142 | 0.0395 |
| 30 |              |     |          |      |        |        |        |        |
| 31 | Pokorny      | 1   | 92.30    | 10   | 0.1083 | 0.0934 | 0.0364 | 0.2393 |
| 32 | Pokorny      | 2-4 | 307.70   | 6    | 0.0195 | 0.0216 | 0.0114 | 0.0409 |
| 33 |              |     |          |      |        |        |        |        |
| 34 | Ruengorn     | 1   | 4.52     | 1    | 0.2212 | 0.0606 | 0.0086 | 0.4286 |
| 35 | Ruengorn     | 2-4 | 15.06    | 0    | 0.0000 | 0.0165 | 0.0039 | 0.0699 |
| 36 |              |     |          |      |        |        |        |        |
| 37 | Seemuller    | 1   | 18.29    | 1    | 0.0547 | 0.0314 | 0.0056 | 0.1751 |
| 38 | Seemuller    | 2-4 | 60.96    | 0    | 0.0000 | 0.0101 | 0.0029 | 0.0347 |
| 39 |              |     |          |      |        |        |        |        |
| 40 | Valenstein   | 1   | 3026.18  | 50   | 0.0165 | 0.0170 | 0.0085 | 0.0339 |
| 41 |              |     |          |      |        |        |        |        |
| 42 |              |     |          |      |        |        |        |        |
| 43 |              |     |          |      |        |        |        |        |
| 44 |              |     |          |      |        |        |        |        |
| 45 |              |     |          |      |        |        |        |        |
| 46 |              |     |          |      |        |        |        |        |

|            |     |          |     |        |        |        |        |
|------------|-----|----------|-----|--------|--------|--------|--------|
| Valenstein | 2-4 | 10123.29 | 77  | 0.0076 | 0.0075 | 0.0044 | 0.0127 |
| Winkler    | 1   | 2640.19  | 131 | 0.0496 | 0.0495 | 0.0256 | 0.0954 |
| Winkler    | 2-4 | 8800.64  | 127 | 0.0144 | 0.0144 | 0.0086 | 0.0243 |

1  
2  
3  
4  
5  
6  
7  
8  
9  
10  
11  
12  
13  
14  
15  
16  
17  
18  
19  
20  
21  
22  
23  
24  
25  
26  
27  
28  
29  
30  
31  
32  
33  
34  
35  
36  
37  
38  
39  
40  
41  
42  
43  
44  
45  
46

For peer review only

**eSupplement 7. Forrest Plot Suicide rates in one week and two-four weeks following discharge from psychiatric hospitalisation**

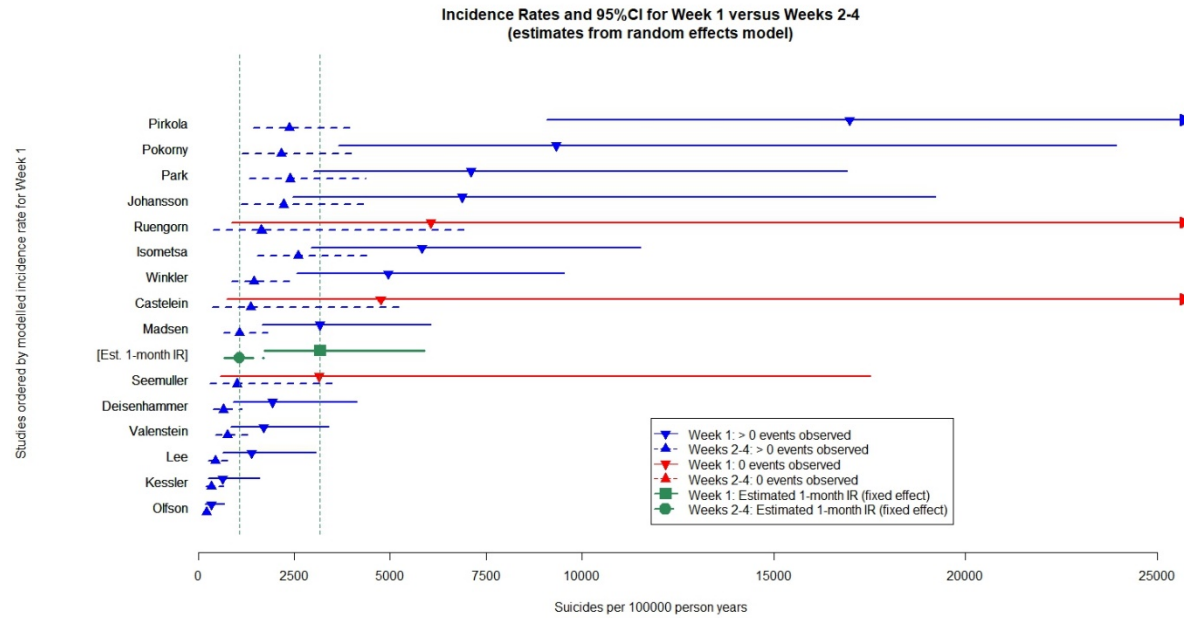

only

**eSupplement 8. Funnel Plot of Suicide rates in one month following discharge from psychiatric hospitalisation**

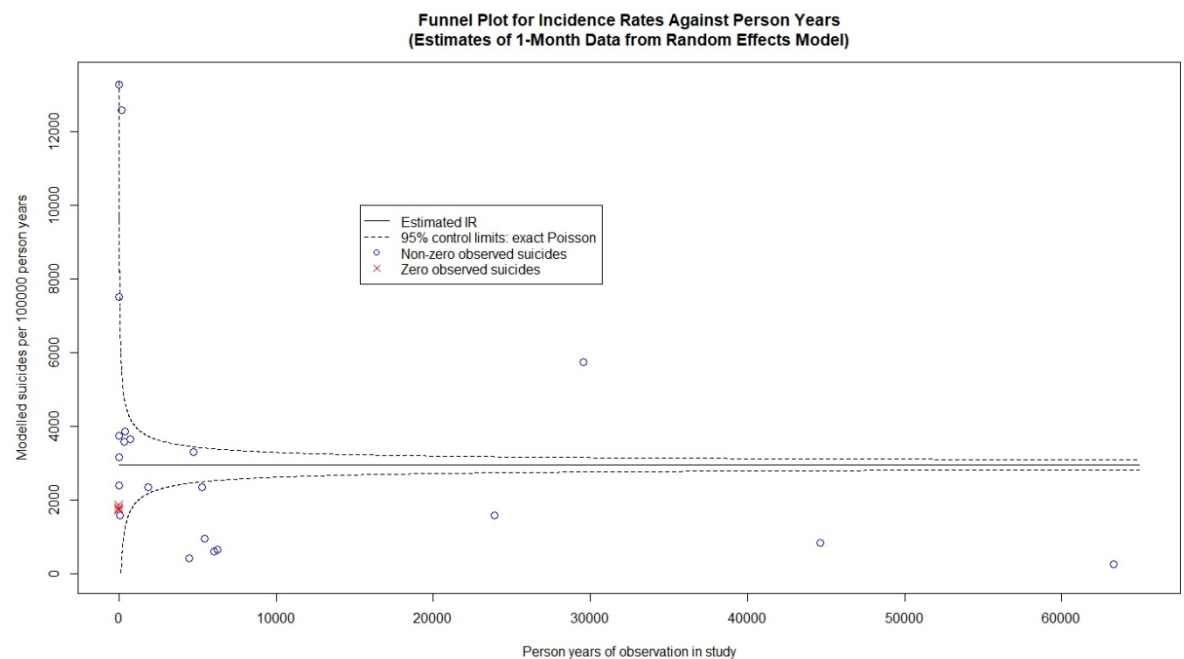

view only

**eSupplement 9. Funnel Plot of Suicide rates in one week following discharge from psychiatric hospitalisation**

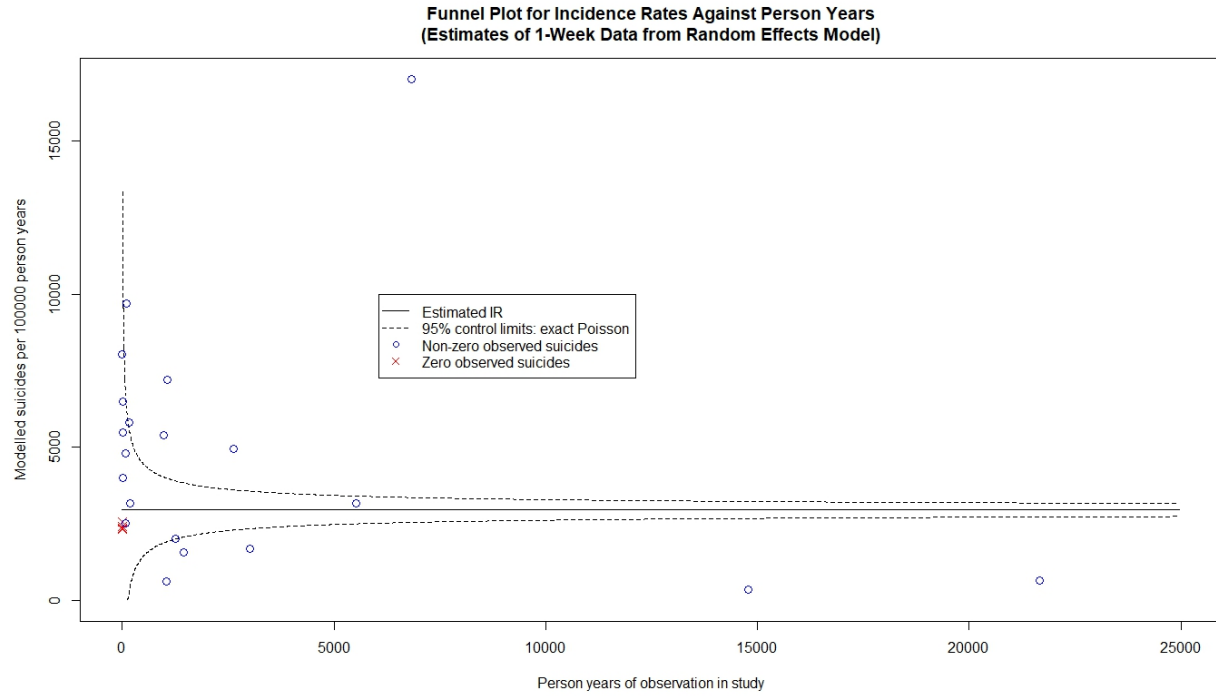

only

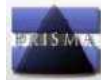

# PRISMA 2009 Checklist

| Section/topic                      | #  | Checklist item                                                                                                                                                                                                                                                                                              | Reported on page # |
|------------------------------------|----|-------------------------------------------------------------------------------------------------------------------------------------------------------------------------------------------------------------------------------------------------------------------------------------------------------------|--------------------|
| <b>TITLE</b>                       |    |                                                                                                                                                                                                                                                                                                             |                    |
| Title                              | 1  | Identify the report as a systematic review, meta-analysis, or both.                                                                                                                                                                                                                                         | 1                  |
| <b>ABSTRACT</b>                    |    |                                                                                                                                                                                                                                                                                                             |                    |
| Structured summary                 | 2  | Provide a structured summary including, as applicable: background; objectives; data sources; study eligibility criteria, participants, and interventions; study appraisal and synthesis methods; results; limitations; conclusions and implications of key findings; systematic review registration number. | 1                  |
| <b>INTRODUCTION</b>                |    |                                                                                                                                                                                                                                                                                                             |                    |
| Rationale                          | 3  | Describe the rationale for the review in the context of what is already known.                                                                                                                                                                                                                              | 3                  |
| Objectives                         | 4  | Provide an explicit statement of questions being addressed with reference to participants, interventions, comparisons, outcomes, and study design (PICOS).                                                                                                                                                  |                    |
| <b>METHODS</b>                     |    |                                                                                                                                                                                                                                                                                                             |                    |
| Protocol and registration          | 5  | Indicate if a review protocol exists, if and where it can be accessed (e.g., Web address), and, if available, provide registration information including registration number.                                                                                                                               | 4                  |
| Eligibility criteria               | 6  | Specify study characteristics (e.g., PICOS, length of follow-up) and report characteristics (e.g., years considered, language, publication status) used as criteria for eligibility, giving rationale.                                                                                                      | 4                  |
| Information sources                | 7  | Describe all information sources (e.g., databases with dates of coverage, contact with study authors to identify additional studies) in the search and date last searched.                                                                                                                                  | 4                  |
| Search                             | 8  | Present full electronic search strategy for at least one database, including any limits used, such that it could be repeated.                                                                                                                                                                               | 4                  |
| Study selection                    | 9  | State the process for selecting studies (i.e., screening, eligibility, included in systematic review, and, if applicable, included in the meta-analysis).                                                                                                                                                   | 4                  |
| Data collection process            | 10 | Describe method of data extraction from reports (e.g., piloted forms, independently, in duplicate) and any processes for obtaining and confirming data from investigators.                                                                                                                                  | 4                  |
| Data items                         | 11 | List and define all variables for which data were sought (e.g., PICOS, funding sources) and any assumptions and simplifications made.                                                                                                                                                                       | 5                  |
| Risk of bias in individual studies | 12 | Describe methods used for assessing risk of bias of individual studies (including specification of whether this was done at the study or outcome level), and how this information is to be used in any data synthesis.                                                                                      | 5                  |
| Summary measures                   | 13 | State the principal summary measures (e.g., risk ratio, difference in means).                                                                                                                                                                                                                               | 5                  |
| Synthesis of results               | 14 | Describe the methods of handling data and combining results of studies, if done, including measures of consistency (e.g., $I^2$ ) for each meta-analysis.                                                                                                                                                   | 5                  |

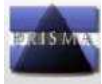

# PRISMA 2009 Checklist

Page 1 of 2

| Section/topic                 | #  | Checklist item                                                                                                                                                                                           | Reported on page # |
|-------------------------------|----|----------------------------------------------------------------------------------------------------------------------------------------------------------------------------------------------------------|--------------------|
| Risk of bias across studies   | 15 | Specify any assessment of risk of bias that may affect the cumulative evidence (e.g., publication bias, selective reporting within studies).                                                             | 5                  |
| Additional analyses           | 16 | Describe methods of additional analyses (e.g., sensitivity or subgroup analyses, meta-regression), if done, indicating which were pre-specified.                                                         | 5                  |
| <b>RESULTS</b>                |    |                                                                                                                                                                                                          |                    |
| Study selection               | 17 | Give numbers of studies screened, assessed for eligibility, and included in the review, with reasons for exclusions at each stage, ideally with a flow diagram.                                          | 28                 |
| Study characteristics         | 18 | For each study, present characteristics for which data were extracted (e.g., study size, PICOS, follow-up period) and provide the citations.                                                             | table 1            |
| Risk of bias within studies   | 19 | Present data on risk of bias of each study and, if available, any outcome level assessment (see item 12).                                                                                                | data supplement    |
| Results of individual studies | 20 | For all outcomes considered (benefits or harms), present, for each study: (a) simple summary data for each intervention group (b) effect estimates and confidence intervals, ideally with a forest plot. | 29                 |
| Synthesis of results          | 21 | Present results of each meta-analysis done, including confidence intervals and measures of consistency.                                                                                                  | 7-9, 29            |
| Risk of bias across studies   | 22 | Present results of any assessment of risk of bias across studies (see Item 15).                                                                                                                          | 9                  |
| Additional analysis           | 23 | Give results of additional analyses, if done (e.g., sensitivity or subgroup analyses, meta-regression [see Item 16]).                                                                                    | 9                  |
| <b>DISCUSSION</b>             |    |                                                                                                                                                                                                          |                    |
| Summary of evidence           | 24 | Summarize the main findings including the strength of evidence for each main outcome; consider their relevance to key groups (e.g., healthcare providers, users, and policy makers).                     | 10                 |
| Limitations                   | 25 | Discuss limitations at study and outcome level (e.g., risk of bias), and at review-level (e.g., incomplete retrieval of identified research, reporting bias).                                            | 11-12              |
| Conclusions                   | 26 | Provide a general interpretation of the results in the context of other evidence, and implications for future research.                                                                                  | 12                 |
| <b>FUNDING</b>                |    |                                                                                                                                                                                                          |                    |
| Funding                       | 27 | Describe sources of funding for the systematic review and other support (e.g., supply of data); role of funders for the systematic review.                                                               | 13                 |

From: Moher D, Liberati A, Tetzlaff J, Altman DG, The PRISMA Group (2009). Preferred Reporting Items for Systematic Reviews and Meta-Analyses: The PRISMA Statement. PLoS Med 6(7): e1000097. doi:10.1371/journal.pmed1000097

For more information, visit: [www.prisma-statement.org](http://www.prisma-statement.org).

For peer review only - <http://bmjopen.bmj.com/site/about/guidelines.xhtml>



# BMJ Open

## Meta-analysis of suicide rates in the first week and first month after psychiatric hospitalisation

|                                 |                                                                                                                                                                                                                                                                                                                                                                                                                |
|---------------------------------|----------------------------------------------------------------------------------------------------------------------------------------------------------------------------------------------------------------------------------------------------------------------------------------------------------------------------------------------------------------------------------------------------------------|
| Journal:                        | <i>BMJ Open</i>                                                                                                                                                                                                                                                                                                                                                                                                |
| Manuscript ID                   | bmjopen-2018-023883.R1                                                                                                                                                                                                                                                                                                                                                                                         |
| Article Type:                   | Research                                                                                                                                                                                                                                                                                                                                                                                                       |
| Date Submitted by the Author:   | 27-Nov-2018                                                                                                                                                                                                                                                                                                                                                                                                    |
| Complete List of Authors:       | Chung, Daniel; The University of New South Wales, School of Psychiatry<br>Hadzi-Pavlovic, Dusan; UNSW Australia,<br>Wang, Maggie; The University of New South Wales, School of Psychiatry<br>Swaraj, Sascha; The University of New South Wales, School of Psychiatry<br>Olfson, Mark; Columbia University, Department of Psychiatry<br>Large, Matthew; The University of New South Wales, School of Psychiatry |
| <b>Primary Subject Heading</b>: | Mental health                                                                                                                                                                                                                                                                                                                                                                                                  |
| Secondary Subject Heading:      | Epidemiology                                                                                                                                                                                                                                                                                                                                                                                                   |
| Keywords:                       | Suicide & self-harm < PSYCHIATRY, Risk management < HEALTH SERVICES ADMINISTRATION & MANAGEMENT, EPIDEMIOLOGY                                                                                                                                                                                                                                                                                                  |
|                                 |                                                                                                                                                                                                                                                                                                                                                                                                                |

SCHOLARONE™  
Manuscripts



## ABSTRACT

### Objective

To assess the magnitude of suicide rates in the first week and first month post-discharge following psychiatric hospitalisation.

### Design

Meta-analysis of relevant English-language, peer-reviewed papers published in Medline, PsychINFO or Embase between 1 January 1945 and 31 March 2017 and supplemented by hand searching and by personal communication. A generalised linear effects model was fitted to the number of suicides, with a Poisson distribution, log link, and log of person years as an offset. A random effects model was used to calculate the over all pooled rates and within subgroups in sensitivity analyses.

### Outcome Measures

Suicides per 100,000 person years in the week and first month after discharge from psychiatric hospitalisation.

### Results

34 included papers comprised 29 studies reported suicides in the first month post-discharge (3,551 suicides during 222,546 patient years) and 24 studies reported suicides in the first week post-discharge (1,928 suicides during 60,880 patient years). The pooled estimate of the suicide rate in the first month post-discharge suicide was 2,060 per 100,000 person years (95% confidence interval (CI) = 1,300 – 3,280,  $I^2=90$ ). The pooled estimate of the suicide rate in the first week post-discharge suicide was 2,950 suicides per 100,000 person years (95% CI = 1,740–5,000,  $I^2 = 88$ ). Eight studies that were included after personal communication had lower pooled rates of suicide than studies included after data extraction and there was evidence of publication bias towards papers reporting a higher rate of post discharge suicide.

## Conclusion

Acknowledging the presence of marked heterogeneity between studies and the likelihood of bias towards publication of studies reporting a higher post discharge suicide rate, the first week and month post-discharge following psychiatric hospitalisation are periods of extraordinary suicide risk. Short-term follow-up of discharged patients should be augmented with greater focus on safe transition from hospital to community care.

## Registration

Prospero registration CRD42016038169

## Funding

No funding source involved.

## Strengths and limitations of this study

- Published and previously unavailable data were synthesised to estimate rates of suicide in the first week and first month post discharge following psychiatric hospitalisation
- Pooled rates of suicide were about 3000 and 2000 per 100,000 person years respectively in the first week and first month post discharge
- Published studies reported higher suicide rates than data obtained by personal communication
- High between study heterogeneity and the likelihood of publication bias towards studies with higher suicide rates may impact the generalizability of our estimated rates
- The period immediately following discharge from psychiatric hospitalisation should be regarded as a distinct phase of care associated with an extraordinary suicide risk.

### Data Sharing

All Individual study data is available in the supplementary material.

For peer review only

## Introduction

A recent meta-analysis of suicide mortality after discharge from psychiatric facilities estimated a rate of 484 per 100,000 person years among 100 studies reporting on suicides after any period of follow up and 1132 suicides per 100,000 person years among 18 studies reporting on suicides in the first three months.<sup>1</sup> These alarming figures suggest that the suicide rate among this vulnerable patient group is about 100 times global suicide rate and that being a recently discharged patient confers a higher risk of suicide death than any other risk factor.<sup>2</sup> However, the earlier meta-analysis did not report estimates over periods shorter than three months<sup>1</sup> because the methods used excluded the duplicated patient samples with smaller number of patient years and because no steps were taken to obtain further data by personal communication. As a result, the earlier study included only two studies that reported suicide rates in the first month post hospital discharge.<sup>1</sup> Although several primary studies have reported on suicide in the immediate post-discharge period<sup>3-5</sup> expected rates of suicide in the first week and month of transition from the hospital to the community remain uncertain. Knowledge of the extent and trajectory of the suicide risk in the weeks following hospital discharge would inform the timing and duration of interventions aimed at reducing these tragic events.

The primary aim of this study was to calculate a pooled estimate and statistical dispersion (range, median and quartile values) of one-week and one-month post-discharge suicide rates. The secondary aim was to examine the possible moderators of the suicide rates over these two periods of follow up according to the characteristics of the primary research.

## Methods

The meta-analysis was registered with PROSPERO<sup>6</sup> (Registration CRD42016038169) and conducted according to PRISMA<sup>7</sup> and MOOSE<sup>8</sup> guidelines.

### Search Strategy and Selection Criteria

We included longitudinal studies that reported the number of person years and the number of suicides in the first week (one-week) and first month (or 28 days) post-discharge (one-month) after discharge from acute adult psychiatric hospitalisation. We defined acute adult psychiatric hospitalisation broadly so as to include hospitalisations, patients admitted with specific psychiatric diagnoses, psychiatric discharges of older people and after psychiatric hospitalisation in military settings. We excluded studies of post-discharge suicide after release from child and adolescent psychiatric wards, long-stay mental health wards, forensic psychiatric facilities, and patients who were admitted to non-psychiatric settings (such as emergency departments or the medical or surgical wards of general hospitals). Studies were excluded if the number of suicides and number of person years were not reported, could not be calculated, or could not be obtained by email from the authors.

Two authors (DC and ML) independently searched Medline, PsychINFO and Embase for relevant papers published in English between 1 January 1945 and 31 March 2017 (See Figure 1, eSupplement 1). Electronic searches were supplemented by hand searches of the relevant review articles and the full text papers located in the searches conducted for a related meta-analysis<sup>1</sup> were re-examined. Grey literature was not considered. DC and ML independently winnowed titles, abstracts, and full text papers. The authors of studies that met inclusion criteria except for reporting post-discharge suicide rates over periods of longer than a month were contacted by email for data regarding suicides in the one-week and one-month periods. Authors of papers that reported post-

1  
2  
3 discharge suicide in one-month but not report one-week and the  
4 converse were also contacted. A total of 27 authors were contacted.  
5  
6

### 7 8 **Data extraction**

9 SS and MW independently extracted the data and ML and DC  
10 performed a further check of the data. The number of person years  
11 was calculated using the number of discharges and the period of  
12 follow-up of 28 or 31 days when it was not directly reported in the  
13 paper. Where the follow up was specified to be 'one-month' the  
14 length of follow up was assumed to be  $365/12 = 30.4$  days. Separate  
15 figures were extracted for men and women and for the first and  
16 subsequent weeks of follow up where possible.  
17  
18  
19  
20  
21  
22

23 A predetermined list of effect size and moderator variables was  
24 extracted. The variables collected were i) number of suicides and  
25 number of patient years, ii) period of follow up (one-month versus  
26 one week), iii) sex (where specified), iv) diagnostic group (where  
27 specified), v) whether the primary study was people admitted for  
28 suicidal thoughts and behaviours, vi) country in which the study was  
29 conducted, vii) whether the data were obtained by personal  
30 communication with the authors, and viii) study quality items.  
31  
32  
33  
34  
35  
36  
37

38 We assessed study quality using a 0-4 point scale derived from the  
39 Newcastle-Ottawa Scale for assessing the quality of nonrandomised  
40 studies<sup>9</sup> and used in a previous meta-analysis of post-discharge  
41 suicide rates.<sup>1</sup> One point was awarded if the study: i) identified  
42 suicides using coroners' records or a national mortality database  
43 (rather than using hospital records), ii) included all the post-  
44 discharge suicides in a defined geographic region (rather than  
45 suicides from a particular care setting), iii) included open verdicts in  
46 suicide numbers; iv) reported the number of discharges (rather than  
47 the number of individuals).  
48  
49  
50  
51  
52  
53  
54  
55

### 56 **Data analysis**

57  
58  
59  
60



1  
2  
3 The effect sizes of interest were the incidence rate (IR), expressed as  
4 suicides per 100,000 person years and the incidence rate ratio (IRR). In all  
5 analyses a generalized linear mixed effects model was fitted to a count  
6 response (number of suicides), with a Poisson distribution, log link, and log of  
7 person years as an offset allowing the inclusion of fitted values for zero  
8 suicide studies. All models included a random effect (intercept) for study.  
9 Confidence intervals were based on t-distribution with df equal to the number  
10 of studies. All models were fitted with the R package lme4. Standard errors  
11 were calculated using the delta method from the R package car. Pre-specified  
12 subgroup analyses were conducted according to the period of follow up,  
13 source of the data (published or obtained by personal communication),  
14 country of publication, sex, and study quality using a mixed effects model.  
15 Publication bias was examined directly by i) comparing extracted data to that  
16 obtained by personal communication, ii) examination of Funnel Plots and iii)  
17 Egger's regression tests based on the fitted values.  
18  
19  
20  
21  
22  
23  
24  
25  
26  
27  
28  
29  
30

### 31 **Patient and Public Involvement**

32 The results of this study were discussed with Easter Suburbs Mental Health  
33 Service, Consumer Advisory Group for their views on suicide prevention in the  
34 suicide in the post discharge period.  
35  
36  
37  
38  
39  
40  
41  
42  
43  
44  
45  
46  
47  
48  
49  
50  
51  
52  
53  
54  
55  
56  
57  
58  
59  
60

## Results

### Search results and data extraction

Independent searches (DC and ML) both identified 24 of 26 papers reporting on suicides occurring in the first week or first month after discharge. A further 8 studies were included after data were provided by personal communication with the authors, such that either one-week or one-month data or both periods was available from 34 papers (Table 1, eSupplement 2.). The earliest study was published in 1983, the median year of publication was 2009 and the most recent was published in 2017. Twenty-nine papers contained data pertaining to the first month post-discharge (eSupplement 3). Twenty-four papers reported on suicides in the first week post-discharge (eSupplement 4).

There were disagreements concerning 6 of the 68 data points relating to either the number of suicides or number of patient years. All disagreements were resolved by a second examination of the data by DC and ML.

### Suicides within a month of discharge

Twenty-nine studies (inclusive of 4 studies with no suicides) reported 3,551 suicides in the first month after discharge during 222,546 person years. The mean number of suicides per study was 122 (SD 443) and the mean number of person years per study was 7,674 (SD 22,581). The median sample suicide rate was 2,333 per 100,000 person years with a range of 0 to 30,252 per 100,000 person years. The first and third quartiles were 601 and 4,555 per 100,000 person years, respectively (see Figure 2. Forrest Plot of suicide rates in one month following discharge from psychiatric hospitalisation). The pooled rate of one-month post-discharge suicide was 2,060 per 100,000 person years (95% CI 1,300–3,280) with very high between-sample heterogeneity ( $Q = 266.8$ ,  $p < 0.001$ ,  $I^2 = 90$ ) (Table 2).

1  
2  
3 Separate data for men and women were available for 10 studies  
4 reporting one-month post-discharge suicides including 6 studies  
5 obtained by personal communication. Men had almost twice the  
6 pooled rate of suicide of women (IRR 1.94 95%, CI 1.54 – 2.44; See  
7 Table 2, eSupplement 5 & 6).  
8  
9  
10

11  
12 Studies of patients admitted for suicidal thoughts or behaviours had  
13 over three times the rate of suicide than studies of psychiatric  
14 patients who were not selected in this way (IRR 3.56, 95% CI 1.29-  
15 7.63) but this result was based on a small number of studies and  
16 suicides among patients presenting with suicidal thoughts or  
17 behaviours. The analysis of suicide rates according to diagnostic  
18 group was also limited by a small number of studies but suggested  
19 that groups of patients with a mood disorder might have higher rates  
20 of one-month post discharge suicide than groups of patients that  
21 were not selected by diagnosis (Table 2).  
22  
23  
24  
25  
26  
27  
28  
29

30 The eight studies deemed to be of low quality had a higher pooled  
31 suicide rate compared to the studies deemed to be of higher quality  
32 (IRR 1.99 95% CI 1.98–2.01). The eight studies from Asian countries  
33 had the highest pooled suicide rate of suicide, followed by the 10  
34 studies from European countries; the five studies from the UK,  
35 Canada, and Australia; while the 6 US studies had the lowest rate  
36 (Table 2).  
37  
38  
39  
40  
41  
42  
43

44 Excluding four studies that reported no suicides, fifteen studies  
45 reported one-month and one-week suicides allowing a direct  
46 comparison of the suicide rates over the first week post-discharge to  
47 the remaining 8-31 days. Among these studies, the one-week pooled  
48 suicide rate was almost three times the rate in the 8-31 day period  
49 (IRR 2.99 95% CI 2.24- 3.97; See Table 2, eSupplement 7 & 8).  
50  
51  
52  
53

54 Data obtained direct extraction from published papers had a  
55 significantly higher one-month post-discharge suicide than data  
56 obtained by personal communication (IRR 3.14, 95% CI 1.29 –  
57 7.63). The Funnel Plot was characterised by 8 studies with lower  
58  
59  
60

1  
2  
3 suicide rates than the pooled estimate and 5 studies with higher  
4 suicide rates than the pooled estimate lying outside the Funnel  
5 (eSupplement 9). An Eggers test confirmed the likelihood of  
6 publication bias towards studies with a higher post discharge suicide  
7 rate (Eggers Bias = 4.94, 95% CI 1.38-8.50, df = 27,  $P < .004$ )  
8  
9

### 15 **Suicide rates in the first week post discharge**

17  
18 24 studies were included in a meta-analysis of one-week post-  
19 discharge suicide rates. These comprised 15 studies reporting  
20 suicides at both one-month and one-week (as above, Table 2), five  
21 studies reporting suicides in one-week but not one month and four  
22 studies with no suicides. The 24 studies reported a total of 1,928  
23 suicides (mean = 80.3 per study, SD= 315.5, median = 8) during  
24 60,880 person years (mean = 2,536.7 per study, SD = 7783, median  
25 = 174.5). The median sample suicide rate was 3,186 per 100,000  
26 person years (range 0–75,000 per 100,000, first quartile = 567, third  
27 quartile = 6,730).  
28  
29

30  
31 The pooled one-month post-discharge suicide rate was 2,950  
32 suicides per 100,000 person years (95% CI 1,740-5,000) with very  
33 high between study heterogeneity ( $Q = 186.4$ ,  $p < 0.0001$ ),  $I^2 = 88$ ).  
34 (see Figure 3. Forrest Plot of suicide rates in one week following  
35 discharge from psychiatric hospitalisation).  
36  
37

38  
39 Data extracted from published papers had a significantly higher rate  
40 of suicide than personally communicated data (IRR 3.63, 95% CI  
41 1.55 – 8.49). The Funnel Plot was characterised by 5 studies with  
42 lower suicide rates than the pooled estimate and there were 4  
43 studies with higher suicide rates than the pooled estimate lying  
44 outside the Funnel (eSupplement 10). An Eggers test confirmed the  
45 likelihood of publication bias towards studies with a higher post  
46 discharge suicide rate (Eggers Bias = 4.31, 95% CI .85-7.78, df = 22,  
47  $p < .008$ ).  
48  
49  
50  
51  
52  
53  
54  
55  
56  
57  
58  
59  
60

1  
2  
3 Studies considered to have a lower quality had a higher rate of  
4 suicide than those assessed to have a lower quality (IRR 2.83 95%  
5 CI 2.80-2.85).  
6  
7  
8  
9  
10  
11  
12  
13  
14  
15  
16  
17  
18  
19  
20  
21  
22  
23  
24  
25  
26  
27  
28  
29  
30  
31  
32  
33  
34  
35  
36  
37  
38  
39  
40  
41  
42  
43  
44  
45  
46  
47  
48  
49  
50  
51  
52  
53  
54  
55  
56  
57  
58  
59  
60

For peer review only

## Discussion

This study synthesised over thirty years of research on suicide risk during the period immediately following psychiatric hospitalisation. The study builds on a previous meta-analysis of post psychiatric discharge suicide rates<sup>1</sup> by including unpublished data and data that were excluded from an earlier meta-analysis of suicide rates post discharge<sup>1</sup> to estimate suicide rates over the first week and first month post discharge. One-week post-discharge suicide rates were approximately 3,000 suicides per 100,000 person years while one-month rates were approximately 2,000 per 100,000 person years. Rates from the beginning of the second week to the end of the fourth week or one-month post-discharge were approximately 1,000 per 100,000 person years. Rates of 2,000 to 3,000 per 100,000 person years are respectively about 200–300 times the global suicide rate.<sup>10</sup> Our results also compare with a recent meta-analysis that estimated 1,132 suicides per 100,000 person years among 18 studies of the first three months and 484 per 100,000 person years among 100 studies of any period of follow up.<sup>1</sup> This suggests a six-fold risk of suicide in the first week post-discharge compared to the long-term rates of suicide after psychiatric discharge of about 500 per 100,000 person years. It further suggests that length of time since discharge is at least as important as clinical risk factors for suicide (odds ratio =1.50)<sup>11</sup> and high-risk models for suicide (odds ratio = 4.84)<sup>12</sup> reported in longitudinal studies.<sup>13</sup>

Our finding of higher rates of suicides by men in the immediate post-discharge period is unsurprising because of the preponderance of men among all suicide deaths<sup>10</sup> but is in contrast with less clear gender effects on inpatient suicide rates.<sup>14 15</sup>

The main limitation of our study is uncertainty about the extent to which our pooled estimates can be generalised. We observed very high between-study heterogeneity that may be partially explained by publication bias towards studies with high suicide rates and aspects of study quality. However, in all likelihood there are real differences

1  
2  
3 in post discharge suicide rates between settings that cannot be  
4 examined using the existing literature. Most importantly, this study  
5 was not able to ascertain the role of the availability and quality of  
6 post-discharge care in determining post discharge suicide rates.  
7  
8  
9

10  
11 Our findings emphasise the importance of post-discharge follow up.  
12 Currently in the United States only around half of commercially  
13 insured patients and a third of Medicare patients in the US received  
14 a psychiatric follow-up visit within 7 days of hospital discharge for a  
15 mental illness.<sup>16</sup> In the United Kingdom, the NICE guidelines suggest  
16 that people discharged from mental health settings should be  
17 followed up within seven days.<sup>17</sup> While the introduction of a seven  
18 day follow period is one of a suite of measures that do seem to be  
19 associated lower suicide rates in the UK,<sup>18</sup> it is sobering to consider  
20 that some patients who are scheduled to be followed up at the seven  
21 day mark will die before they are ever reassessed.  
22  
23  
24  
25  
26  
27  
28  
29

30  
31 Very high rates of suicide in the immediate post-discharge period should  
32 encourage clinicians to think carefully about the patient's transition from  
33 hospital to the community. Qualitative research suggests that the transition  
34 from hospital to home is associated with re-emergence of pre-existing social  
35 stresses and new stresses associated with hospitalisation.<sup>19-21</sup> Clinicians  
36 should consider strategies that might improve this transition, including pre-  
37 and post-discharge patient psycho-education, formal needs based  
38 assessments, use of transitional care teams, improved communication  
39 between the inpatient team, and greater involvement of the patient's  
40 outpatient team and family.<sup>22</sup>  
41  
42  
43  
44  
45  
46  
47  
48

49  
50 The high risk of suicide during the period immediately following hospital  
51 discharge provides a clinical rationale for conceptualizing the first post-  
52 discharge month as a distinct phase of recovery and treatment, especially in  
53 the context of pervasive gaps in treatment following psychiatric  
54 hospitalization. Traditional case management approaches to continuity of  
55 care following psychiatric hospitalisation have not consistently yielded  
56 promising results. In one review, two of seven studies of telephone follow-up  
57  
58  
59  
60

1  
2  
3 and one of five studies that involved facilitating communication between  
4 inpatient and outpatient clinicians resulted in a significant increase in  
5 continuity of care <sup>22</sup>. Intensive interventions that involve home visits, social  
6 support, motivational interviewing, and accompanying patients to outpatient  
7 appointments have yielded more encouraging results.<sup>23 24</sup>  
8  
9

10  
11  
12 Other limitations relate to the representativeness of the included  
13 studies. All of the research came from high-income economies of  
14 Asia, Australasia, North America, and Europe and our results might  
15 not be representative of post-discharge suicide in low and middle-  
16 income countries. Moreover, there were an insufficient number of  
17 studies to determine whether apparent differences in suicide rates  
18 between regions were real or were simply the result of available  
19 studies. Differences between rates of post-discharge suicide  
20 between countries are plausible because of differences in national  
21 suicide rates, <sup>10</sup> progress towards deinstitutionalisation, <sup>25</sup> and likely  
22 national differences in the quality of mental health care systems <sup>26</sup>  
23  
24  
25  
26  
27  
28  
29  
30  
31

32  
33 Although it has been argued that one way of combatting post-  
34 discharge suicide is to focus on individual patients with clinical  
35 characteristics that signify a high suicide risk,<sup>27 28</sup> the very high  
36 suicide rates calculated in this study and the known limitations of  
37 suicide risk assessment <sup>29</sup> suggest that a narrow focus on clinical  
38 risk assessment might mislead clinicians into thinking that some  
39 recently discharged psychiatric inpatients can be regarded as being  
40 at low risk post-discharge.<sup>30</sup> Our findings support an approach to  
41 suicide prevention focussed on whole cohorts of discharged  
42 patients.<sup>31</sup>  
43  
44  
45  
46  
47  
48  
49  
50  
51  
52  
53  
54  
55  
56  
57  
58  
59  
60



## **Role of the funding source**

There was no funding source for this study.

## **Conflicts of Interest**

Dr. Olfson reports grants from Janssen Scientific Affairs, outside the submitted work.

## **Author Contribution Statement**

**Study Design; DC, ML**

**Data Collection; DC, ML, MO, SS, MW**

**Data Analysis; DH-P, ML**

**Interpretation and Critical Review; ML, MO, DH-P**

**Manuscript Preparation: DC, DH-P, ML, MO, SS, MW**

Dr Large has full access to all the data in the study and takes responsibility for the integrity of the data and accuracy of the analysis

## **Acknowledgment**

The authors would like to thank the following authors who provided further information about their published studies of suicide after psychiatric hospitalisation: Dr Ebehard Deisenhammer, Dr Erkki Isometsa, Dr Ron Kessler, Dr Edith Liemburg; Dr Natalie Riblet, Dr Marcia Valenstein.

There was no funding source for this study.

## References

1. Chung DT, Ryan CJ, Hadzi-Pavlovic D, Singh SP, Stanton C, Large MM. Suicide Rates After Discharge From Psychiatric Facilities: A Systematic Review and Meta-analysis. *JAMA Psychiatry* 2017;74:694-702.
2. Large M. The role of prediction in suicide prevention. *Dialogues Clin Neurosci* 2018;20:197-205.
3. Ho T-P. The suicide risk of discharged psychiatric patients. *J Clin Psychiatry* 2003;64:702-07.
4. Goldacre M, Seagroatt V, Hawton K. Suicide after discharge from psychiatric inpatient care. *Lancet* 1993;342:283-6.
5. Geddes JR, Juszcak E. Period trends in rate of suicide in first 28 days after discharge from psychiatric hospital in Scotland, 1968-92. *BMJ* 1995;311:357-60.
6. PROSPERO. International prospective register of systematic reviews <https://www.crd.york.ac.uk/prospéro/>
7. Liberati A, Altman DG, Tetzlaff J, et al. The PRISMA statement for reporting systematic reviews and meta-analyses of studies that evaluate health care interventions: explanation and elaboration. *J Clin Epidemiol* 2009;62(10):e1-34. doi: 10.1016/j.jclinepi.2009.06.006
8. Stroup DF, Berlin JA, Morton SC, et al. Meta-analysis of observational studies in epidemiology: a proposal for reporting. Meta-analysis Of Observational Studies in Epidemiology (MOOSE) group. *JAMA* 2000;283:2008-12.
9. Wells GA, Shea B, O'Connell D, et al. The Newcastle-Ottawa Scale (NOS) for assessing the quality of nonrandomised studies in meta-analyses. Accessed from [http://www.ohrica.com/programs/clinical\\_epidemiology/oxfordasp](http://www.ohrica.com/programs/clinical_epidemiology/oxfordasp)
10. Age-standardized suicide rates (per 100 000 population): World Health Organisation 2015 (accessed October 2015 from [http://www.who.int/gho/mental\\_health/suicide\\_rates/en/](http://www.who.int/gho/mental_health/suicide_rates/en/)).
11. Franklin JC, Ribeiro JD, Fox KR, et al. Risk factors for suicidal thoughts and behaviors: A meta-analysis of 50 years of research. *Psychol Bull* 2017;143:187-232.
12. Large M, Kaneson M, Myles N, et al. Meta-Analysis of Longitudinal Cohort Studies of Suicide Risk Assessment among Psychiatric Patients: Heterogeneity in Results and Lack of Improvement over Time. *PloSone* 2016;11:e0156322.
13. Olfson M, Marcus SC, Bridge JA. Focusing suicide prevention on periods of high risk. *JAMA* 2014;311:1107-8.
14. Large M, Myles N, Myles H, et al. Suicide risk assessment among psychiatric inpatients: a systematic review and meta-analysis of high-risk categories. *Psychol Med* 2018;48:1119-1127
15. Large M, Smith G, Sharma S, et al. Systematic review and meta-analysis of the clinical factors associated with the suicide of psychiatric in-patients. *Acta Psychiatr Scand* 2011;124:18-29.
16. NCQA. Follow-up after hospitalisation for Mental Illness (accessed <http://www.ncqa.org/report-cards/health-plans/state-of-health-care-quality/2017-table-of-contents/follow-up>: National Committee for Quality Assurance; 2016 )
17. NICE. Transition between inpatient mental health settings and community or care home settings: National Institute for Health and Care Excellence, 2016.
18. While D, Bickley H, Roscoe A, et al. Implementation of mental health service recommendations in England and Wales and suicide rates, 1997-2006: a cross-sectional and before-and-after observational study. *Lancet* 2012;379:1005-12.
19. Owen-Smith A, Bennewith O, Donovan J, et al. "When you're in the hospital, you're in a sort of bubble." Understanding the high risk of self-harm and suicide following psychiatric discharge: a qualitative study. *Crisis* 2014;35:154-60

20. Chung DT, Ryan CJ, Large MM. Commentary: Adverse experiences in psychiatric hospitals might be the cause of some postdischarge suicides. *Bull Menninger Clin* 2016;80:371-75.
21. Schechter M, Goldblatt MJ, Ronningstam E, et al. Postdischarge suicide: A psychodynamic understanding of subjective experience and its importance in suicide prevention. *Bull Menninger Clin* 2016;80:80-96.
22. Vigod SN, Kurdyak PA, Dennis CL, et al. Transitional interventions to reduce early psychiatric readmissions in adults: systematic review. *Br J Psychiatry* 2013;202:187-94.
23. Dixon L, Goldberg R, Iannone V, et al. Use of a critical time intervention to promote continuity of care after psychiatric inpatient hospitalization. *Psychiatr Serv* 2009;60:451-8.
24. Shaffer SL, Hutchison SL, Ayers AM, et al. Brief Critical Time Intervention to Reduce Psychiatric Rehospitalization. *Psychiatr Serv* 2015;66:1155-61.
25. Taylor Salisbury T, Killaspy H, King M. An international comparison of the deinstitutionalisation of mental health care: Development and findings of the Mental Health Services Deinstitutionalisation Measure (MENDit). *BMC Psychiatry* 2016;16:54.
26. Spaeth-Rublee B, Pincus HA, Silvestri F, et al. Measuring quality of mental health care: an international comparison. *Int J Environ Res Public Health*. 2014;11(10):10384-9.
27. Berman AL, Silverman MM. Suicide risk assessment and risk formulation part II: suicide risk formulation and the determination of levels of risk. *Suicide Life Threat Behav* 2014;44(4):432-43.
28. Turecki G, Brent DA. Suicide and suicidal behaviour. *Lancet* 2016;387:1227-39.
29. Ryan CJ, Large MM. Suicide risk assessment: where are we now? *Med J Aust* 2013;198(9):462-3.
30. Nordentoft M, Erlangsen A, Madsen T. Postdischarge Suicides: Nightmare and Disgrace. *JAMA Psychiatry* 2016;73(11):1113-14.
31. Olfson M, Marcus SC, Bridge JA. Focusing suicide prevention on periods of high risk. *JAMA* 2014;311:1107-08.
32. Castelein S, Liemburg EJ, de Lange JS, et al. Suicide in Recent Onset Psychosis Revisited: Significant Reduction of Suicide Rate over the Last Two Decades - A Replication Study of a Dutch Incidence Cohort. *PLoS One* 2015;10(6):e0129263.
33. De Leo D, Heller T. Intensive case management in suicide attempters following discharge from psychiatric care. *Aust J Prim Health* 2007;13(3):49-58.
34. Deisenhammer EA, Behrnt E-M, Kemmler G, et al. A comparison of suicides in psychiatric in-patients, after discharge and in not recently hospitalized individuals. *Compr Psychiatry* 2016;69:100-5.
35. Erlangsen A, Zarit SH, Tu X, et al. Suicide among older psychiatric inpatients: an evidence-based study of a high-risk group. *Am J Geriatr Psychiatry*. 2006;14:734-41.
36. Geddes JR, Juszczak E. Period trends in rate of suicide in first 28 days after discharge from psychiatric hospital in Scotland, 1968-92. *BMJ*. 1995;311:357-60
37. Goldacre M, Seagroatt V, Hawton K. Suicide after discharge from psychiatric inpatient care. *Lancet* 1993;342:283-86.
38. Hayashi N, Igarashi M, Imai A, et al. Post-hospitalization course and predictive signs of suicidal behavior of suicidal patients admitted to a psychiatric hospital: a 2-year prospective follow-up study. *BMC Psychiatry* 2012;12(1):1.
39. Healy D, Harris M, Tranter R, et al. Lifetime suicide rates in treated schizophrenia: 1875-1924 and 1994-1998 cohorts compared. *Br J Psychiatry* 2006;188:223-28.
40. Isometsa E, Sund R, Pirkola S. Post-discharge suicides of inpatients with bipolar disorder in Finland. *Bipolar Disord* 2014;16(8):867-74.

- 1
- 2
- 3
- 4 41. Johansson LM, Johansson S-E, Sundquist J, et al. Suicide among psychiatric in-
- 5 patients in Stockholm, Sweden. *Arch Suicide Res* 1996;2(3):171-81.
- 6 42. Kessler RC, Warner CH, Ivany C, et al. Predicting Suicides After Psychiatric
- 7 Hospitalization in US Army Soldiers: The Army Study to Assess Risk and
- 8 Resilience in Servicemembers (Army STARRS). *JAMA Psychiatry* 2015;72(1):49-
- 9 57.
- 10 43. Lee HC, Lin HC. Are psychiatrist characteristics associated with postdischarge
- 11 suicide of schizophrenia patients? *Schizophr Bull* 2009;35:760-5.
- 12 44. Links P, Nisenbaum R, Ambreen M, et al. Prospective study of risk factors for
- 13 increased suicide ideation and behavior following recent discharge. *Gen Hosp*
- 14 *Psychiatry* 2012;34(1):88-97.
- 15 45. Luxton DD, Trofimovich L, Clark LL. Suicide risk among US Service members after
- 16 psychiatric hospitalization, 2001-2011. *Psychiatr Serv* 2013;64:626-9.
- 17 46. Madsen T, Nordentoft M. Changes in inpatient and postdischarge suicide rates in a
- 18 nationwide cohort of Danish psychiatric inpatients, 1998-2005. *J Clin Psychiatry*
- 19 2013;74(12):e1190-4.
- 20 47. Naik PC, Davies S, Buckley AM, et al. Long-term mortality after first psychiatric
- 21 admission. *Br J Psychiatry* 1997;170(1):43-46.
- 22 48. Nyman AK, Jonsson H. Patterns of self-destructive behaviour in schizophrenia. *Acta*
- 23 *Psychiatr Scand* 1986;73(3):252-62.
- 24 49. Olfson M, Wall M, Wang S, et al. Short-term Suicide Risk After Psychiatric Hospital
- 25 Discharge. *JAMA Psychiatry* 2016;73:1119-26.
- 26 50. Park S, Choi JW, Kyoung Yi K, et al. Suicide mortality and risk factors in the 12
- 27 months after discharge from psychiatric inpatient care in Korea: 1989-2006.
- 28 *Psychiatry Res* 2013;208:145-50.
- 29 51. Pedersen CG, Jensen SOW, Gradus J, et al. Systematic suicide risk assessment for
- 30 patients with schizophrenia: a national population-based study. *Psychiatr Serv*
- 31 2014;65:226-31
- 32 52. Pirkola S, Sohlman B, Heilä H, et al. Reductions in postdischarge suicide after
- 33 deinstitutionalization and decentralization: a nationwide register study in
- 34 Finland. *Psychiatr Serv.* 2007;58:221-6
- 35 53. Pokorny AD. Prediction of suicide in psychiatric patients: report of a prospective
- 36 study. *Arch Gen Psychiatry* 1983;40:249-57.
- 37 54. Qurashi I, Kapur N, Appleby L. A prospective study of noncompliance with
- 38 medication, suicidal ideation, and suicidal behavior in recently discharged
- 39 psychiatric inpatients. *Arch Suicide Res* 2006;10:61-7.
- 40 55. Riblet N, Shiner B, Watts BV, et al. Death by Suicide Within 1 Week of Hospital
- 41 Discharge: A Retrospective Study of Root Cause Analysis Reports. *J Nerv Ment Dis*
- 42 2017;205(6):436-42.
- 43 56. Ruengorn C, Sanichwankul K, Niwatananun W, et al. Incidence and risk factors of
- 44 suicide reattempts within 1 year after psychiatric hospital discharge in mood
- 45 disorder patients. *Clin Epidemiol* 2011;3:305-13.
- 46 57. Sani G, Tondo L, Koukopoulos A, et al. Suicide in a large population of former
- 47 psychiatric inpatients. *Psychiatry Clin Neurosci* 2011;65:286-95.
- 48 58. Seemuller F, Meier S, Obermeier M, et al. Three-Year long-term outcome of 458
- 49 naturalistically treated inpatients with major depressive episode: severe relapse
- 50 rates and risk factors. *Eur Arch Psychiatry Clin Neurosci* 2014;264(7):567-75.
- 51 59. Tejedor M, Diaz A, Castillon J, et al. Attempted suicide: repetition and survival
- 52 findings of a follow-up study. *Acta Psychiatr Scand* 1999;100:205-11.
- 53 60. Tsai S-YM, Kuo C-J, Lee H-C. Risk factors for completed suicide in bipolar disorder. *J*
- 54 *Clin Psychiatry* 2002;63:469-76.
- 55 61. Tseng M-C, Cheng I-C, Lee Y-J, et al. Intermediate-term outcome of psychiatric
- 56 inpatients with major depression. *J Formos Med Assoc* 2006;105(8):645-52.
- 57
- 58
- 59
- 60

- 1  
2  
3 62. Valenstein M, Kim HM, Ganoczy D, et al. Higher-risk periods for suicide among VA  
4 patients receiving depression treatment: prioritizing suicide prevention efforts. *J*  
5 *Affect Disord* 2009;112(1-3):50-8.  
6  
7 63. Winkler P, Mlada K, Csemy L, et al. Suicides following inpatient psychiatric  
8 hospitalization: A nationwide case control study. *J Affect Disord* 2015;184:164-9.  
9  
10 64. Yim PH, Yip PS, Li RH, et al. Suicide after discharge from psychiatric inpatient care: a  
11 case-control study in Hong Kong. *Aust N Z J Psychiatry*. 2004;38(1-2):65-72.  
12  
13  
14  
15  
16  
17  
18  
19  
20  
21  
22  
23  
24  
25  
26  
27  
28  
29  
30  
31  
32  
33  
34  
35  
36  
37  
38  
39  
40  
41  
42  
43  
44  
45  
46  
47  
48  
49  
50  
51  
52  
53  
54  
55  
56  
57  
58  
59  
60

For peer review only

## Tables

| Table 1. List of included studies        |                                                           |           |                                    |                             |            |                            |                             |
|------------------------------------------|-----------------------------------------------------------|-----------|------------------------------------|-----------------------------|------------|----------------------------|-----------------------------|
| Study                                    | Location                                                  | Period    | Suicide Ascertainment              | Type of Patient             | Discharges | Suicides in the first week | Suicides on the first month |
| Castelein et al., (2015) <sup>32</sup>   | Psychiatric hospitals in Groningen, the Netherlands       | 2000-2011 | Regional psychiatric case register | Recent onset psychosis      | 424        | 1                          | -                           |
| De Leo & Heller (2007) <sup>33</sup>     | Gold Coast Hospital, Queensland, Australia                | 2002-2005 | Not specified                      | Previous suicide attempters | 60         | 0                          | 0                           |
| Deisenhammer et al. (2016) <sup>34</sup> | Three psychiatric hospitals, Tyrol, Austria               | 2004-2011 | Not specified                      | Unselected adults           | 65,652     | 25                         | 51                          |
| Erlangsen (2006) <sup>35</sup>           | All psychiatric hospitals, Denmark                        | 1990-2001 | Coronial records                   | Adults aged >60 years       | 72,701     | 77                         | -                           |
| Geddes et al. (1997) <sup>36</sup>       | All psychiatric hospitals, Scotland, UK                   | 1968-1993 | Coronial records                   | Unselected adults           | 338,013    | -                          | 367                         |
| Goldacre et al. (1993) <sup>37</sup>     | Hospitals within the Oxford Regional Health Authority, UK | 1979-1986 | Coronial records                   | Unselected adults           | 26,864     | -                          | 44                          |
| Hayashi et al. (2012) <sup>38</sup>      | Tokyo Metropolitan Matsuzawa                              | 2006-2009 | Not specified                      | Admitted suicidal patients  | 3,450      | -                          | 0                           |

|                                        |                                                                      |               |                     |                                                                      |         |     |     |
|----------------------------------------|----------------------------------------------------------------------|---------------|---------------------|----------------------------------------------------------------------|---------|-----|-----|
|                                        | Hospital,<br>Japan                                                   |               |                     |                                                                      |         |     |     |
| Healy et al.<br>(2006) <sup>39</sup>   | Unspecified<br>hospitals,<br>North Wales<br>UK                       | 1994-<br>2003 | Coronial<br>records | Psychotic<br>patients                                                | 133     | -   | 2   |
| Ho (2003) <sup>3</sup>                 | All psychiatric<br>wards and<br>hospitals in<br>Hong Kong,<br>China  | 1997-<br>2000 | Coronial<br>records | Unselected<br>adults                                                 | 21,921  | -   | 124 |
| Isometsa<br>(2014) <sup>40</sup>       | All psychiatric<br>wards and<br>hospitals,<br>Finland                | 1987-<br>2004 | Coronial<br>records | Adults with<br>bipolar<br>disorder                                   | 52,747  | 53  | 158 |
| Johansson<br>(1996) <sup>41</sup>      | All psychiatric<br>inpatients in<br>southern<br>Stockholm,<br>Sweden | 1984-<br>1985 | Coronial<br>records | Unselected<br>adults                                                 | 3,862   | 4   | 12  |
| Kessler et al.<br>(2015) <sup>42</sup> | US Army<br>psychiatric<br>hospitals and<br>wards, USA                | 2004-<br>2009 | Coronial<br>records | US army<br>psychiatric<br>patients                                   | 53,769  | 5   | 17  |
| Lee & Lin<br>(2009) <sup>43</sup>      | All psychiatric<br>wards and<br>hospitals in<br>Taiwan               | 2001-<br>2005 | Coronial<br>records | Patients<br>with<br>schizophre<br>nia                                | 435     | 22  | 39  |
| Links et al.<br>(2012) <sup>44</sup>   | St Michael's<br>Hospital,<br>Toronto,<br>Canada                      | 2007-<br>2009 | Not<br>specified    | Patients<br>with<br>previous<br>suicidal<br>behaviour<br>or ideation | 120     | -   | 3   |
| Luxton et al.<br>(2013) <sup>45</sup>  | US Military<br>treatment<br>facilities, USA                          | 2001-<br>2011 | Coronial<br>records | US service<br>members                                                | 68,947  | -   | 35  |
| Madsen &                               | All psychiatric                                                      | 1998-         | Coronial            | Unselected                                                           | 287,866 | 175 | 374 |



|                                      |                                                            |               |                                          |                                  |          |       |       |
|--------------------------------------|------------------------------------------------------------|---------------|------------------------------------------|----------------------------------|----------|-------|-------|
| Nordentoft (2013) <sup>46</sup>      | wards and hospitals in Denmark                             | 2006          | records                                  | adults                           |          |       |       |
| Naik et al. (1997) <sup>47</sup>     | Saxondale Hospital, Nottinghamshire, England, UK           | 1974-1992     | Local registers and NHS central register | Unselected adults                | 86       | -     | 0     |
| Nyman (1986) <sup>48</sup>           | Unspecified psychiatric hospital, Sweden                   | 1964-1968     | Coronial records                         | Patients with schizophrenia      | 110      |       | 0     |
| Olfson (2016) <sup>49</sup>          | Psychiatric patients from 45 American states               | 2001-2008     | Coronial records                         | Unselected adults                | 770,643  | 49    | 151   |
| Park et al. (2013) <sup>50</sup>     | Asan Medical Center, Seoul, South Korea                    | 1989-2006     | Coronial records                         | Unselected adults                | 8,403    | 10    | 26    |
| Pedersen et al. (2014) <sup>51</sup> | All psychiatric hospitals and wards in Denmark             | 2005-2010     | Coronial records                         | Patients with schizophrenia      | 7,107    | 6     | -     |
| Pirkola et al. (2007) <sup>52</sup>  | All psychiatric hospitals and wards in Finland             | 1985-2001     | Coronial records                         | Unselected adults                | 355,000  | 1,164 | 1,698 |
| Pokorny (1983) <sup>53</sup>         | Houston Veterans Administration Medical Centre, Texas, USA | Not specified | Coronial records                         | Veterans administration patients | 4,800    | 10    | 16    |
| Qurashi et al. (2006) <sup>54</sup>  | Unspecified hospital, Manchester, England, UK              | Not specified | Not specified                            | Unselected adults                | 69       | 1     | -     |
| Riblet (2017)                        | All American                                               | 2002-         | Coronial                                 | Unselected                       | 1,126,17 | 141   | -     |



|                                       |                                                                             |               |                  |                                                     |         |     |     |
|---------------------------------------|-----------------------------------------------------------------------------|---------------|------------------|-----------------------------------------------------|---------|-----|-----|
| 55                                    | Veteran Health mental health inpatient units                                | 2015          | records          | American service-people                             | 9       |     |     |
| Ruengorn et al. (2011) <sup>56</sup>  | Suanprung Psychiatric Hospital, Chiang Mai, Thailand                        | 2007-2010     | Hospital records | Mood disorder patients admitted for suicide attempt | 235     | 1   | 1   |
| Sani et al. (2011) <sup>57</sup>      | Belvedere Montello Hospital, Rome, Italy                                    | 1964-1998     | Coronial records | Unselected adults                                   | 4,441   | 2   | -   |
| Seemuller et al. (2014) <sup>58</sup> | Twelve centres across Germany                                               | Not specified | Study follow up  | Patients with major depression                      | 1,014   | 1   | 1   |
| Tejedor et al. (1999) <sup>59</sup>   | Psychiatric Department of Santa Cruz y San Pablo Hospital, Barcelona, Spain | 1983-1997     | Study follow up  | Suicide attempters                                  | 150     | 0   | 1   |
| Tsai (2002) <sup>60</sup>             | Taipei City Psychiatric Center, Taiwan                                      | 1985-1997     | Coronial Records | Patients with mood disorders                        | 2,133   | 0   | 24  |
| Tseng et al. (2006) <sup>61</sup>     | Unspecified psychosomatic ward, Taiwan                                      | 2000-2002     | Study follow up  | Patients with major depression                      | 67      |     | 2   |
| Valenstein (2009) <sup>62</sup>       | All US veteran psychiatric inpatient facilities                             | 1999-2004     | Coronial data    | American veterans with mood disorders               | 184,093 | 50  | 127 |
| Winkler et al. (2015) <sup>63</sup>   | All psychiatric hospitals and psychiatric                                   | 2006-2012     | Coronial records | Unselected adults                                   | 137,290 | 131 | 258 |

|                          |                                                     |           |                  |                   |       |   |    |
|--------------------------|-----------------------------------------------------|-----------|------------------|-------------------|-------|---|----|
|                          | wards, Czech Republic                               |           |                  |                   |       |   |    |
| Yim (2004) <sup>64</sup> | Pamela Youde Nethersole Eastern Hospital, Hong Kong | 1996-1999 | Coronial records | Unselected adults | 6,292 | - | 20 |

For peer review only

| Table 2. Suicide rates in the first first month post discharge from psychiatric settings |           |          |               |                 |             |             |  |
|------------------------------------------------------------------------------------------|-----------|----------|---------------|-----------------|-------------|-------------|--|
|                                                                                          | N Studies | Suicides | Patient years | Pooled estimate | Lower Limit | Upper Limit |  |
| One month                                                                                | 29        | 3551     | 222546        | 2060            | 1300        | 3280        |  |
| Subgroup of studies reporting follow up at 1 week and 2-4weeks                           |           |          |               |                 |             |             |  |
| One Week                                                                                 | 15        | 1928     | 60854         | 3170            | 1710        | 5890        |  |
| Two to four weeks                                                                        | 15        | 1229     | 115858        | 1060            | 660         | 1070        |  |
| Subgroup of studies reporting suicides by men and women                                  |           |          |               |                 |             |             |  |
| Male                                                                                     | 10        | 917      | 83913         | 1400            | 780         | 2500        |  |
| Female                                                                                   | 10        | 497      | 82989         | 720             | 390         | 1320        |  |
| Subgroup of studies according to data source                                             |           |          |               |                 |             |             |  |
| Extracted directly                                                                       | 22        | 2672     | 107439        | 2880            | 1770        | 4670        |  |
| Personally communicated                                                                  | 7         | 879      | 115107        | 920             | 430         | 1930        |  |
| Subgroups of studies according to selection for suicidal thoughts or behaviours          |           |          |               |                 |             |             |  |
| Admitted with suicidal thoughts or behaviours                                            | 5         | 5        | 56            | 6210            | 1550        | 24860       |  |
| Unselected by suicidally                                                                 | 24        | 3546     | 222490        | 1850            | 1170        | 2920        |  |
| Subgroups of studies according to selection by diagnosis                                 |           |          |               |                 |             |             |  |
| Patients with a mood disorder                                                            | 6         | 312      | 18201         | 3370            | 1240        | 9180        |  |
| Patients with a schizophrenia spectrum disorder                                          | 3         | 41       | 6270          | 1720            | 330         | 9110        |  |

|                                                    |    |      |        |      |      |      |  |
|----------------------------------------------------|----|------|--------|------|------|------|--|
| Unselected by diagnosis                            | 20 | 3198 | 198075 | 1830 | 1080 | 3110 |  |
| Subgroups of studies according to study quality    |    |      |        |      |      |      |  |
| Higher Quality†                                    | 8  | 820  | 73318  | 1360 | 1350 | 1370 |  |
| Lower Quality                                      | 20 | 2731 | 149227 | 2720 | 2690 | 2740 |  |
| Subgroup of studies according to geographic region |    |      |        |      |      |      |  |
| Asia                                               | 8  | 235  | 13000  | 3230 | 1470 | 7100 |  |
| Europe                                             | 10 | 2554 | 75634  | 2340 | 1170 | 4680 |  |
| United States                                      | 6  | 346  | 87376  | 1030 | 450  | 2380 |  |
| United Kingdom, Australia and Canada               | 5  | 416  | 46535  | 2020 | 630  | 6490 |  |
| † one study failed to converge                     |    |      |        |      |      |      |  |

Table 3. Suicide rates in the week month post discharge from psychiatric settings

|                                                 | N Studies | Suicides | Patient years | Pooled estimate | Lower Limit | Upper Limit |  |
|-------------------------------------------------|-----------|----------|---------------|-----------------|-------------|-------------|--|
| One week                                        | 24        | 1928     | 60880         | 2950            | 1740        | 5000        |  |
| Subgroup of studies according to data source    |           |          |               |                 |             |             |  |
| Extracted directly                              | 16        | 1429     | 12605         | 5090            | 2930        | 8840        |  |
| Personally communicated                         | 8         | 499      | 48257         | 1400            | 740         | 2680        |  |
| Subgroups of studies according to study quality |           |          |               |                 |             |             |  |
| Higher Quality                                  | 5         | 246      | 26370         | 3950            | 3910        | 3990        |  |
| Lower Quality                                   | 19        | 1682     | 34492         | 1400            | 1380        | 1410        |  |

1  
2  
3  
4  
5  
6  
7  
8  
9  
10  
11  
12  
13  
14  
15  
16  
17  
18  
19  
20  
21  
22  
23  
24  
25  
26  
27  
28  
29  
30  
31  
32  
33  
34  
35  
36  
37  
38  
39  
40  
41  
42  
43  
44  
45  
46  
47  
48  
49  
50  
51  
52  
53  
54  
55  
56  
57  
58  
59  
60

For peer review only

1  
2  
3  
4  
5  
6  
7  
8  
9  
10  
11  
12  
13  
14  
15  
16  
17  
18  
19  
20  
21  
22  
23  
24  
25  
26  
27  
28  
29  
30  
31  
32  
33  
34  
35  
36  
37  
38  
39  
40  
41  
42  
43  
44  
45  
46  
47  
48  
49  
50  
51  
52  
53  
54  
55  
56  
57  
58  
59  
60

**Figures 1-3**

**Figure 1. Prisma Flow Chart**

**Figure 2. Forrest Plot of suicide rates in one month following discharge from psychiatric hospitalisation**

**Figure 3. Forrest Plot of suicide rates in one week following discharge from psychiatric hospitalisation**

For peer review only

**eSupplements 1-10**

1. Search strategy
2. Strength of reporting items of included studies
3. Suicide rates in one month following discharge from psychiatric hospitalisation
4. Suicide rates in one week following discharge from psychiatric hospitalisation
5. Suicide rates in one month following discharge from psychiatric hospitalisation with gender subgroups.
6. Forest Plot of studies reporting suicides by men and women in one month following discharge from psychiatric hospitalisation
7. Suicide rates in one week and two-four weeks following discharge from psychiatric hospitalisation
8. Forrest Plot Suicide rates in one week and two-four weeks following discharge from psychiatric hospitalisation
9. Funnel Plot of Suicide rates in one month following discharge from psychiatric hospitalisation
10. Funnel Plot of Suicide rates in one week following discharge from psychiatric hospitalisation

**Figure 1. Prisma Flow Chart**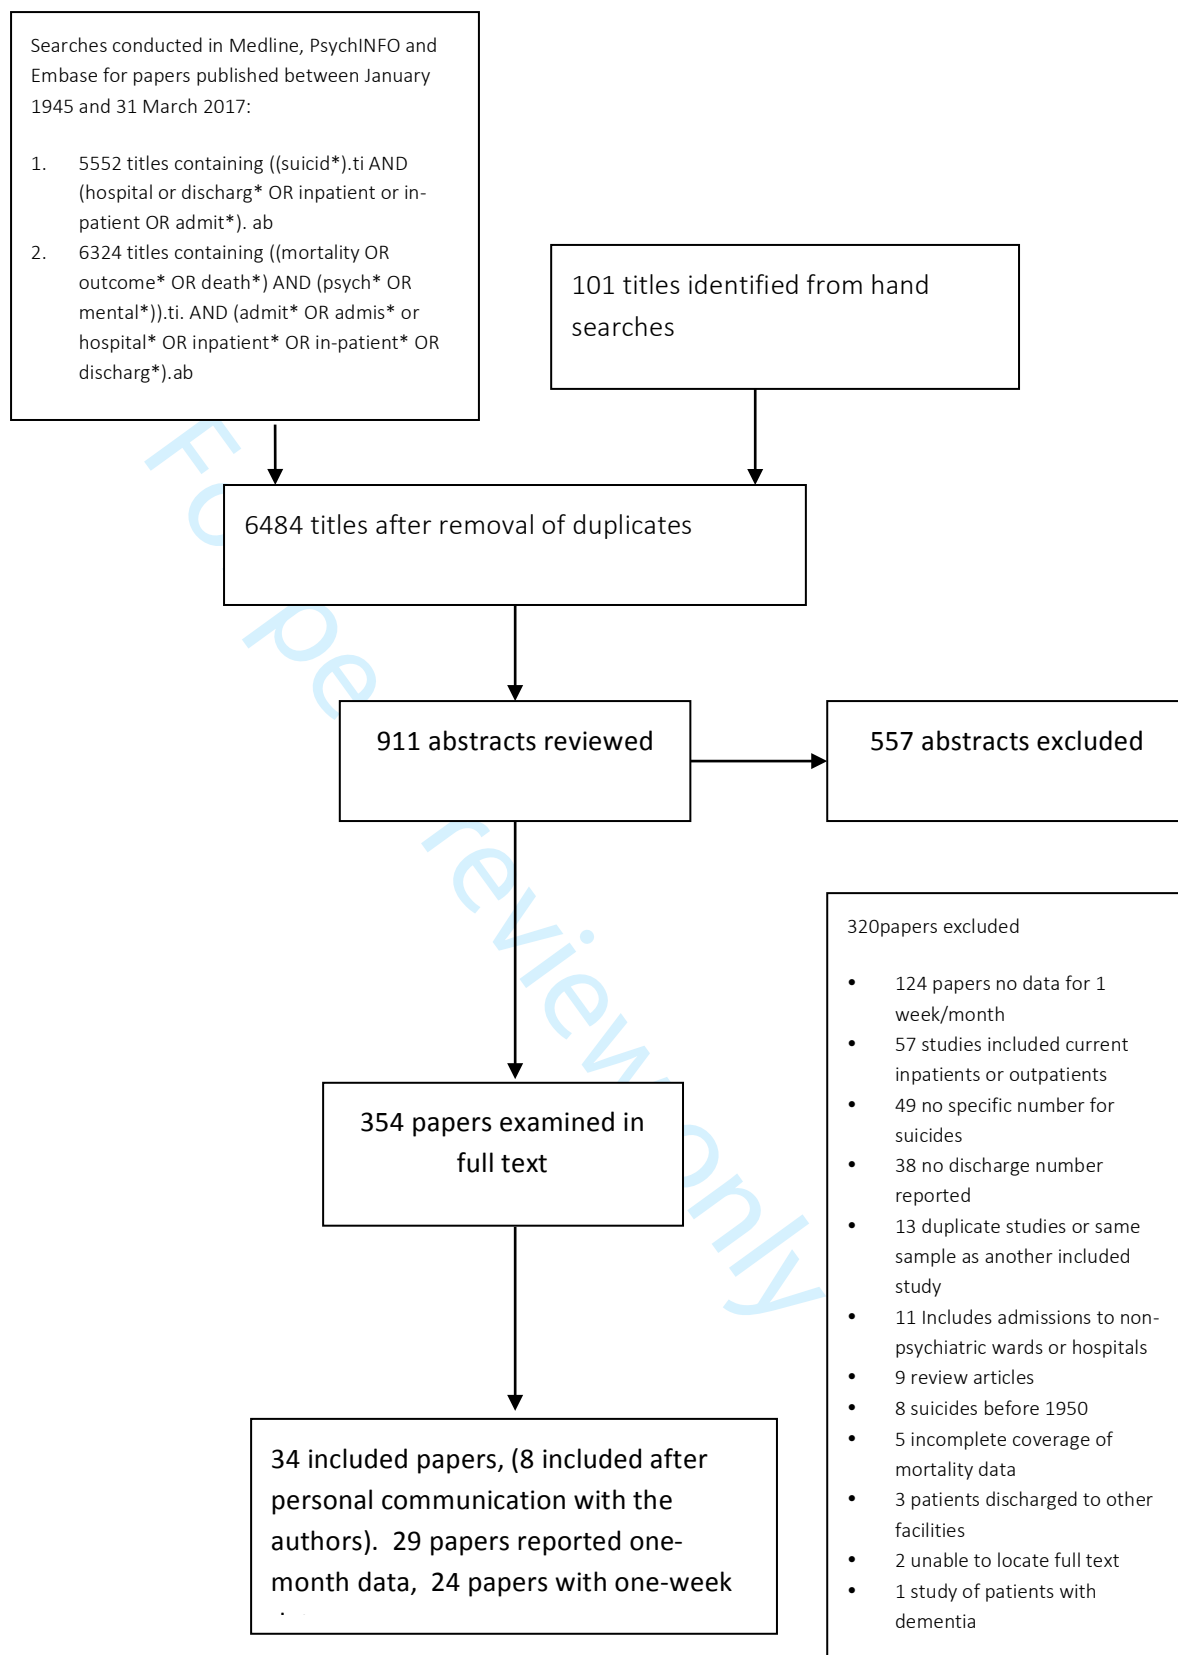



### Incidence Rates and 95%CI for 1-month data (estimates from random effects model)

Studies ordered by modelled Incidence Rate

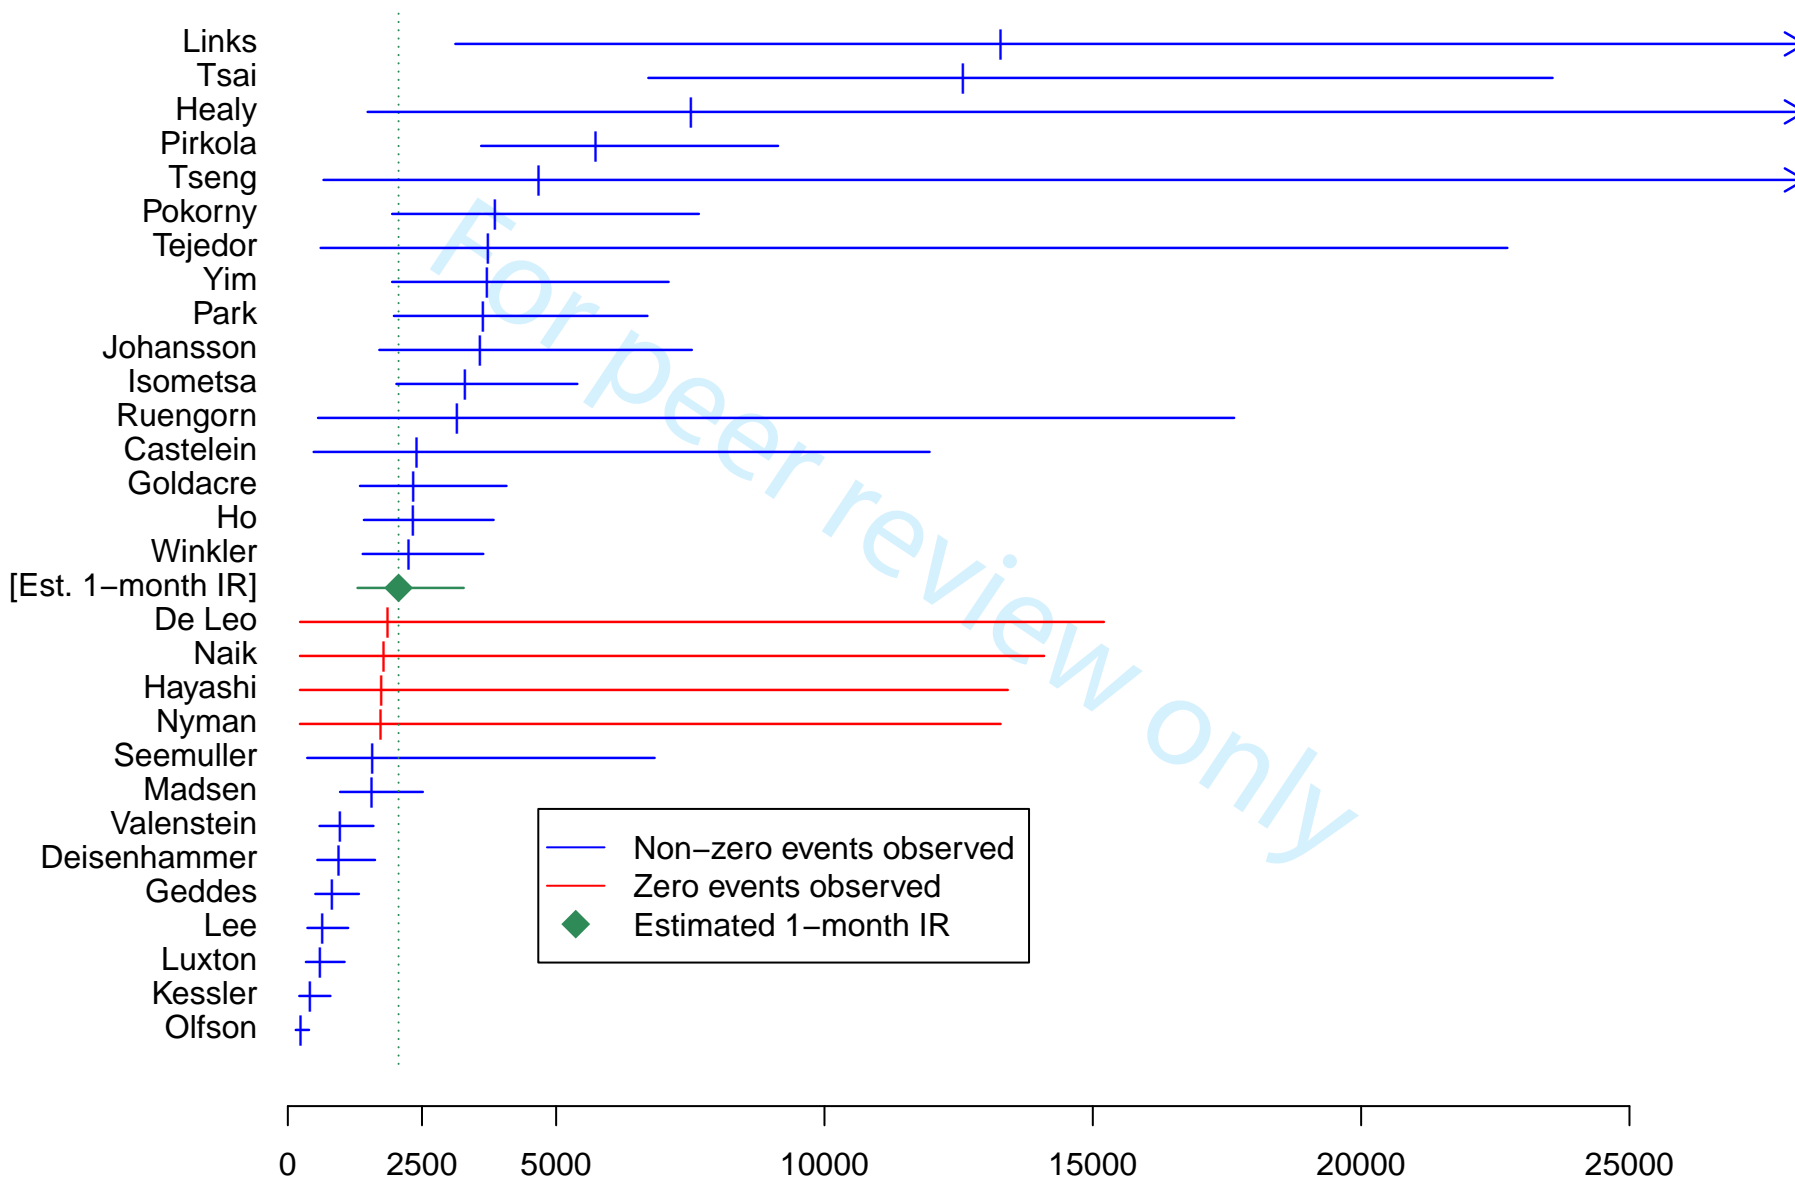

### Incidence Rates and 95%CI for 1-week data (estimates from random effects model)

1  
2  
3  
4  
5  
6  
7  
8  
9  
10  
11  
12  
13  
14  
15  
16  
17  
18  
19  
20  
21  
22  
23  
24  
25  
26  
27  
28  
29  
30  
31  
32  
33  
34  
35  
36  
37  
38  
39  
40  
41  
42  
43  
44  
45  
46

Studies ordered by modelled incidence rate

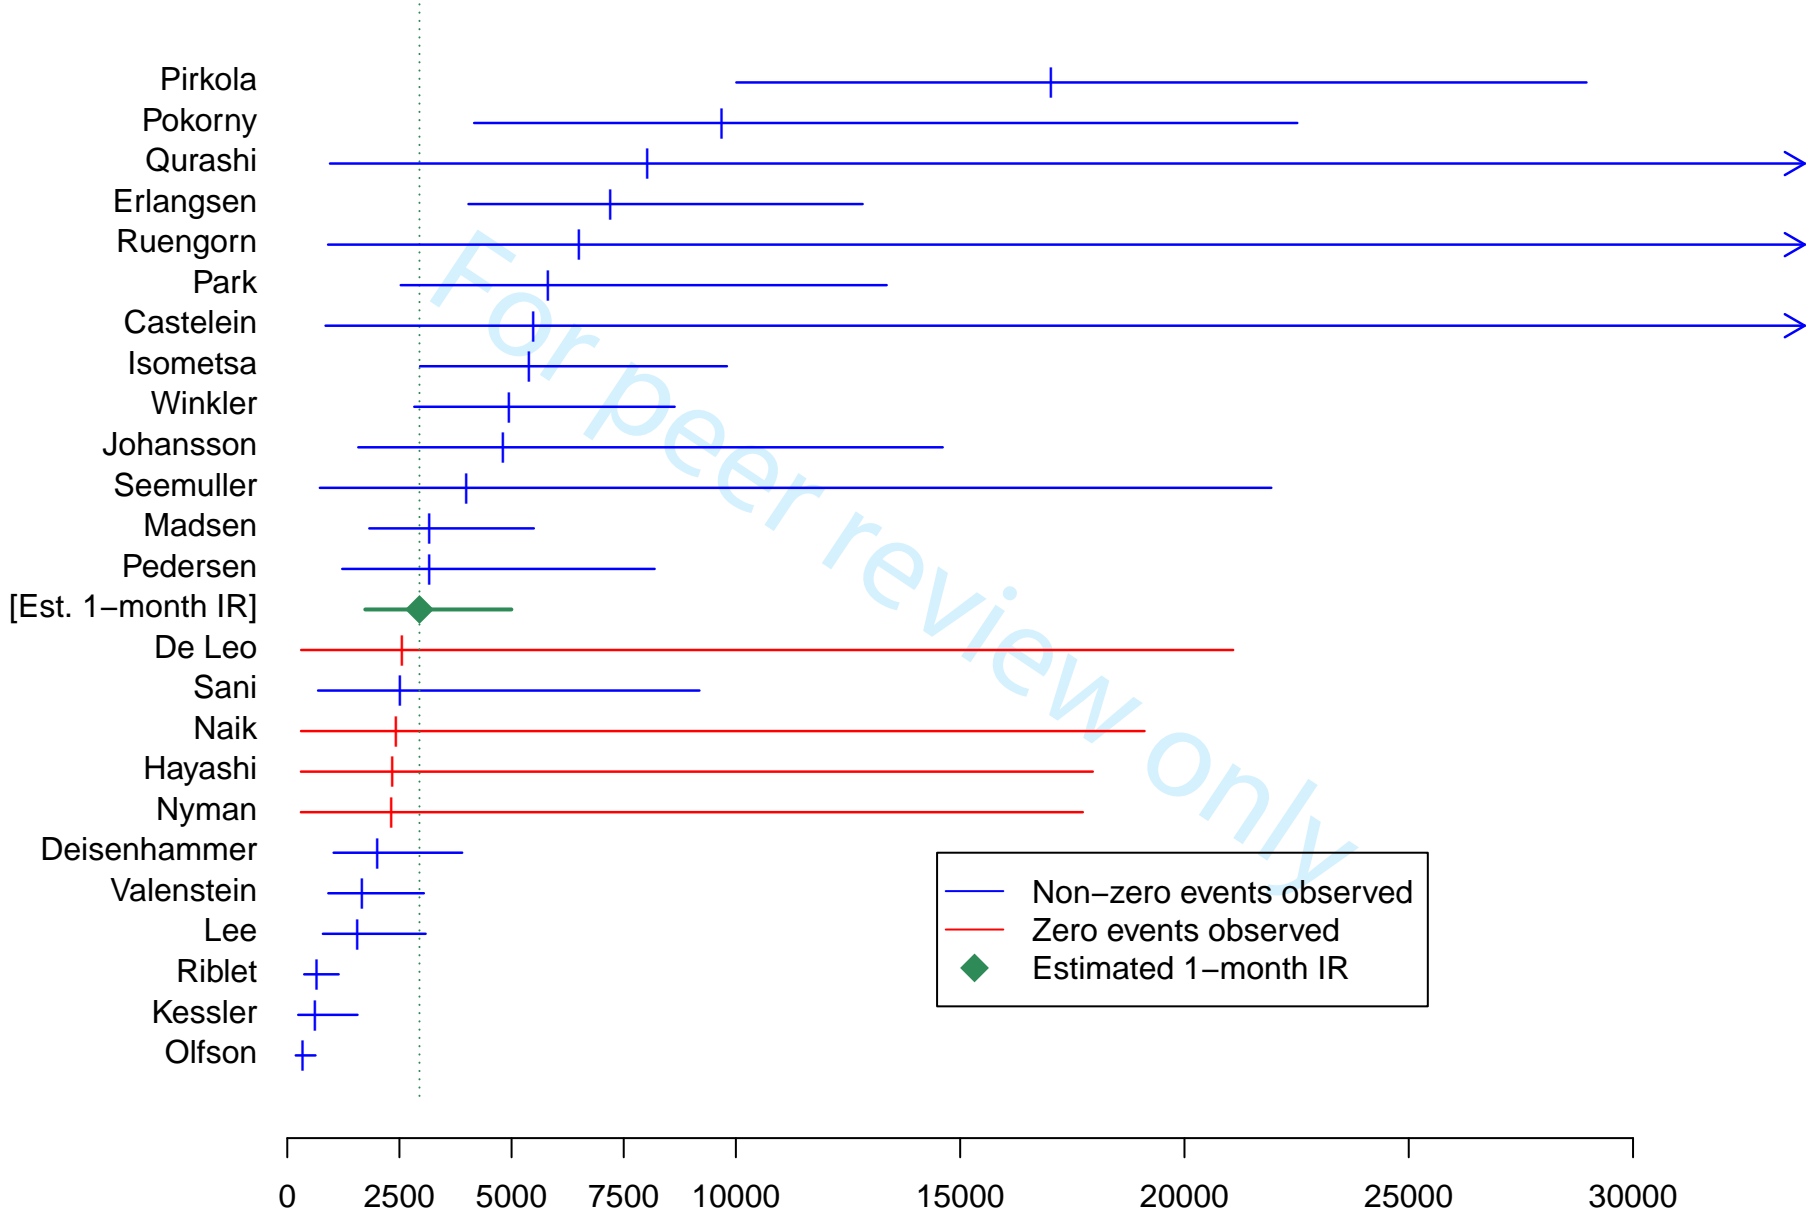

1  
2 eSupplement 1. Search Strategy

3  
4 Data bases Medline, PsychINFO and Embase

5  
6 Dates January 1945 and 31 March 2017:

7  
8 Limits. English Language

9 Search Terms 1. ((suicid\*).ti AND (hospital or discharg\* OR inpatient or in-patient OR admit\*). ab

10  
11 Search Terms 2. ((mortality OR outcome\* OR death\*) AND (psych\* OR mental\*).ti. AND (admit\* OR admis\* or hospital\* OR inpatient\* OR in-patient\* OR discharg\*).ab

12  
13  
14

| eSupplement 2. Strength of reporting items of included studies |                   |                   |                    |                              |                             |
|----------------------------------------------------------------|-------------------|-------------------|--------------------|------------------------------|-----------------------------|
| Study name                                                     | Coronial Verdicts | Counts admissions | Defined Population | Includes Undetermined deaths | Strength of Reporting Score |
| Castelein 2015                                                 | 0                 | 0                 | 1                  | 0                            | 1                           |
| De Leo 2007                                                    | 0                 | 0                 | 0                  | 0                            | 1                           |
| Erlangsen 2006                                                 | 1                 | 0                 | 1                  | 0                            | 2                           |
| Deisenhammer 2016                                              | 1                 | 1                 | 1                  | 0                            | 3                           |
| Geddes 1997                                                    | 1                 | 0                 | 1                  | 1                            | 3                           |
| Goldacre 1993                                                  | 1                 | 1                 | 1                  | 1                            | 4                           |
| Hayashi 2012                                                   | 0                 | 0                 | 0                  | 0                            | 0                           |
| Healy 2006                                                     | 1                 | 0                 | 1                  | 0                            | 2                           |
| Ho 2003                                                        | 1                 | 0                 | 1                  | 1                            | 3                           |
| Isometsa 2014                                                  | 1                 | 1                 | 1                  | 0                            | 3                           |
| Johansson 1996                                                 | 1                 | 0                 | 0                  | 1                            | 2                           |
| Kessler 2015                                                   | 1                 | 1                 | 1                  | 0                            | 3                           |
| Lee 2009                                                       | 1                 | 1                 | 1                  | 0                            | 3                           |
| Links 2012                                                     | 0                 | 0                 | 0                  | 0                            | 0                           |
| Luxton 2013                                                    | 1                 | 0                 | 1                  | 0                            | 2                           |
| Madsen 2013                                                    | 1                 | 0                 | 1                  | 0                            | 2                           |
| Naik 1997                                                      | 1                 | 0                 | 0                  | 0                            | 1                           |
| Nyman 1986                                                     | 1                 | 1                 | 0                  | 0                            | 2                           |
| Olfson 2016                                                    | 1                 | 0                 | 1                  | 0                            | 2                           |
| Park 2013                                                      | 1                 | 0                 | 0                  | 0                            | 1                           |

15  
16  
17  
18  
19  
20  
21  
22  
23  
24  
25  
26  
27  
28  
29  
30  
31  
32  
33  
34  
35  
36  
37  
38  
39  
40  
41  
42  
43

|    |                 |   |   |   |   |   |
|----|-----------------|---|---|---|---|---|
| 1  | Pedersen        | 1 | 0 | 1 | 0 | 2 |
| 2  | Pirkola 2007    | 1 | 0 | 1 | 0 | 2 |
| 3  | Pokorny 1983    | 1 | 0 | 0 | 0 | 1 |
| 4  | Qurashi 2006    | 0 | 0 | 0 | 0 | 0 |
| 5  | Riblet 2017     | 1 | 1 | 1 | 0 | 3 |
| 6  | Ruengorn 2011   | 0 | 0 | 0 | 0 | 0 |
| 7  | Sani 2011       | 1 | 0 | 0 | 0 | 1 |
| 9  | Seemuller 2014  | 0 | 0 | 0 | 0 | 0 |
| 10 | Tejedor 1999    | 0 | 0 | 0 | 0 | 0 |
| 11 | Tsai 2002       | 0 | 0 | 0 | 0 | 0 |
| 12 | Tseng 2006      | 0 | 0 | 0 | 0 | 0 |
| 13 | Valenstein 2009 | 1 | 0 | 1 | 0 | 2 |
| 14 | Winkler 2015    | 1 | 0 | 1 | 0 | 2 |
| 15 | Yim2004         | 1 | 0 | 1 | 1 | 3 |

| eSupplement 3 – Suicide rates in one month following discharge from psychiatric hospitalisation |              |          |          |            |        |        |
|-------------------------------------------------------------------------------------------------|--------------|----------|----------|------------|--------|--------|
| Study                                                                                           | Person years | Suicides | Observed | Fitted     | LL     | UL     |
| Castelein                                                                                       | 36.01        | 1        | 0.0278   | 0.024<br>0 | 0.0048 | 0.1196 |
| De Leo                                                                                          | 5.00         | 0        | 0.0000   | 0.018<br>6 | 0.0023 | 0.1521 |
| Deisenhammer                                                                                    | 5471.00      | 51       | 0.0093   | 0.009<br>5 | 0.0055 | 0.0162 |
| Geddes                                                                                          | 44634.2<br>0 | 367      | 0.0082   | 0.008<br>2 | 0.0051 | 0.0132 |
| Goldacre                                                                                        | 1875.00      | 44       | 0.0235   | 0.023<br>4 | 0.0134 | 0.0407 |
| Hayashi                                                                                         | 8.83         | 0        | 0.0000   | 0.017      | 0.0023 | 0.1342 |

|           |              |      |        |            |        |        |
|-----------|--------------|------|--------|------------|--------|--------|
|           |              |      |        | 4          |        |        |
| Healy     | 11.08        | 2    | 0.1805 | 0.075<br>1 | 0.0149 | 0.3795 |
| Ho        | 5314.00      | 124  | 0.0233 | 0.023<br>3 | 0.0142 | 0.0383 |
| Isometsa  | 4769.00      | 158  | 0.0331 | 0.033<br>0 | 0.0202 | 0.0540 |
| Johansson | 321.00       | 12   | 0.0374 | 0.035<br>8 | 0.0171 | 0.0753 |
| Kessler   | 4480.75      | 17   | 0.0038 | 0.004<br>1 | 0.0021 | 0.0079 |
| Lee       | 6250.00      | 39   | 0.0062 | 0.006<br>4 | 0.0037 | 0.0112 |
| Links     | 9.92         | 3    | 0.3025 | 0.132<br>9 | 0.0312 | 0.5653 |
| Luxton    | 6050.13      | 35   | 0.0058 | 0.006<br>0 | 0.0034 | 0.0106 |
| Madsen    | 23911.9<br>2 | 374  | 0.0156 | 0.015<br>7 | 0.0097 | 0.0252 |
| Naik      | 7.25         | 0    | 0.0000 | 0.017<br>9 | 0.0023 | 0.1409 |
| Nyman     | 9.17         | 0    | 0.0000 | 0.017<br>3 | 0.0023 | 0.1328 |
| Olfson    | 63288.6<br>0 | 151  | 0.0024 | 0.002<br>4 | 0.0015 | 0.0039 |
| Park      | 700.25       | 26   | 0.0371 | 0.036<br>4 | 0.0198 | 0.0670 |
| Pirkola   | 29583.3<br>3 | 1698 | 0.0574 | 0.057<br>4 | 0.0360 | 0.0914 |
| Pokorny   | 400.00       | 16   | 0.0400 | 0.038<br>6 | 0.0194 | 0.0766 |
| Ruengorn  | 19.58        | 1    | 0.0511 | 0.031<br>5 | 0.0056 | 0.1763 |
| Seemuller | 79.25        | 1    | 0.0126 | 0.015<br>7 | 0.0036 | 0.0683 |

|            |                      |     |        |                    |        |        |
|------------|----------------------|-----|--------|--------------------|--------|--------|
| Tejedor    | 12.50                | 1   | 0.0800 | 0.037 <sub>3</sub> | 0.0061 | 0.2272 |
| Tsai       | 177.75               | 24  | 0.1350 | 0.125 <sub>8</sub> | 0.0672 | 0.2357 |
| Tseng      | 5.58                 | 1   | 0.1791 | 0.046 <sub>8</sub> | 0.0066 | 0.3289 |
| Valenstein | 13149.4 <sub>7</sub> | 127 | 0.0097 | 0.009 <sub>7</sub> | 0.0059 | 0.0160 |
| Winkler    | 11440.8 <sub>3</sub> | 258 | 0.0226 | 0.022 <sub>5</sub> | 0.0140 | 0.0364 |
| Yim        | 524.33               | 20  | 0.0381 | 0.037 <sub>1</sub> | 0.0194 | 0.0710 |

For peer review only

1  
2  
3  
4  
5  
6  
7  
8  
9  
10  
11  
12  
13  
14  
15  
16  
17  
18  
19  
20  
21  
22  
23  
24  
25  
26  
27  
28  
29  
30  
31  
32  
33  
34  
35  
36  
37  
38  
39  
40  
41  
42  
43  
44  
45  
46

eSupplement 4. Suicide rates in one week following discharge from psychiatric hospitalisation

| Study        | Person years | Observed | Observed | Fitted | LL     | UL     |
|--------------|--------------|----------|----------|--------|--------|--------|
| Castelein    | 8.14         | 1        | 0.1229   | 0.0548 | 0.0085 | 0.3523 |
| DeLeo        | 5.00         | 0        | 0.0000   | 0.0255 | 0.0031 | 0.2109 |
| Deisenhammer | 1262.54      | 25       | 0.0198   | 0.0201 | 0.0103 | 0.0390 |
| Erlangen     | 1058.72      | 77       | 0.0727   | 0.0720 | 0.0404 | 0.1283 |
| Hayashi      | 8.83         | 0        | 0.0000   | 0.0234 | 0.0030 | 0.1796 |
| Isometsa     | 974.00       | 53       | 0.0544   | 0.0539 | 0.0296 | 0.0980 |
| Johansson    | 74.08        | 4        | 0.0540   | 0.0481 | 0.0158 | 0.1461 |
| Kessler      | 1034.00      | 5        | 0.0048   | 0.0062 | 0.0024 | 0.0157 |
| Lee          | 1442.00      | 22       | 0.0153   | 0.0156 | 0.0079 | 0.0308 |
| Madsen       | 5518.13      | 175      | 0.0317   | 0.0317 | 0.0183 | 0.0550 |
| Naik         | 7.25         | 0        | 0.0000   | 0.0242 | 0.0031 | 0.1911 |
| Nyman        | 9.17         | 0        | 0.0000   | 0.0232 | 0.0030 | 0.1773 |
| Olfson       | 14776.80     | 49       | 0.0033   | 0.0034 | 0.0019 | 0.0063 |
| Park         | 161.60       | 10       | 0.0619   | 0.0581 | 0.0253 | 0.1336 |
| Pedersen     | 187.40       | 6        | 0.0320   | 0.0317 | 0.0123 | 0.0819 |
| Pirkola      | 6826.92      | 1164     | 0.1705   | 0.1703 | 0.1001 | 0.2896 |
| Pokorny      | 92.30        | 10       | 0.1083   | 0.0968 | 0.0417 | 0.2252 |
| Qurashi      | 1.33         | 1        | 0.7536   | 0.0803 | 0.0095 | 0.6766 |

|            |          |     |        |        |        |        |
|------------|----------|-----|--------|--------|--------|--------|
| Riblet     | 21657.30 | 141 | 0.0065 | 0.0066 | 0.0038 | 0.0115 |
| Ruengorn   | 4.52     | 1   | 0.2212 | 0.0650 | 0.0091 | 0.4651 |
| Sani       | 85.31    | 2   | 0.0234 | 0.0251 | 0.0069 | 0.0919 |
| Seemuller  | 18.29    | 1   | 0.0547 | 0.0399 | 0.0073 | 0.2194 |
| Valenstein | 3026.18  | 50  | 0.0165 | 0.0167 | 0.0091 | 0.0304 |
| Winkler    | 2640.19  | 131 | 0.0496 | 0.0494 | 0.0283 | 0.0863 |

eSupplement 5 – Suicide rates in one month following discharge from psychiatric hospitalisation with gender subgroups.

| Study        | Sex | Person years | Suicides | Residual | Observed | Fitted | LL     | UL     |
|--------------|-----|--------------|----------|----------|----------|--------|--------|--------|
| Castelein    | F   | 10.36        | 0        | -0.447   | 0.0000   | 0.0096 | 0.0019 | 0.0491 |
| Castelein    | M   | 25.65        | 1        | 0.646    | 0.0390   | 0.0188 | 0.0039 | 0.0921 |
| Deisenhammer | F   | 3006.00      | 20       | 0.026    | 0.0067   | 0.0066 | 0.0033 | 0.0133 |
| Deisenhammer | M   | 2465.00      | 31       | -0.045   | 0.0126   | 0.0127 | 0.0066 | 0.0246 |
| Geddes       | F   | 24113.30     | 171      | 0.477    | 0.0071   | 0.0068 | 0.0037 | 0.0128 |
| Geddes       | M   | 20520.90     | 196      | -0.456   | 0.0096   | 0.0099 | 0.0055 | 0.0178 |
| Goldacre     | F   | 1072.00      | 16       | -0.205   | 0.0149   | 0.0158 | 0.0077 | 0.0322 |
| Goldacre     | M   | 803.00       | 28       | 0.383    | 0.0349   | 0.0323 | 0.0165 | 0.0633 |
| Ho           | F   | 2582.00      | 53       | 0.830    | 0.0205   | 0.0184 | 0.0095 | 0.0354 |
| Ho           | M   | 2732.00      | 71       | -0.543   | 0.0260   | 0.0276 | 0.0149 | 0.0512 |
| Isometsa     | F   | 2614.00      | 52       | -0.352   | 0.0199   | 0.0209 | 0.0110 | 0.0400 |
| Isometsa     | M   | 2155.00      | 106      | 0.413    | 0.0492   | 0.0471 | 0.0256 | 0.0867 |
| Kessler      | F   | 887.64       | 0        | -2.004   | 0.0000   | 0.0022 | 0.0010 | 0.0050 |
| Kessler      | M   | 3593.11      | 17       | 0.096    | 0.0047   | 0.0046 | 0.0021 | 0.0101 |
| Madsen       | F   | 12533.41     | 125      | -0.171   | 0.0100   | 0.0101 | 0.0054 | 0.0189 |



|            |   |          |     |        |        |        |        |        |
|------------|---|----------|-----|--------|--------|--------|--------|--------|
| Madsen     | M | 11378.51 | 249 | 0.157  | 0.0219 | 0.0217 | 0.0120 | 0.0391 |
| Olfson     | F | 35113.50 | 58  | -0.181 | 0.0017 | 0.0017 | 0.0009 | 0.0032 |
| Olfson     | M | 28175.10 | 93  | -0.069 | 0.0033 | 0.0033 | 0.0018 | 0.0061 |
| Valenstein | F | 1065.11  | 2   | -1.504 | 0.0019 | 0.0046 | 0.0023 | 0.0092 |
| Valenstein | M | 12084.36 | 125 | 0.215  | 0.0103 | 0.0101 | 0.0053 | 0.0196 |

**eSupplement 6. Forest Plot of studies reporting suicides by men and women in one month following discharge from psychiatric hospitalisation**

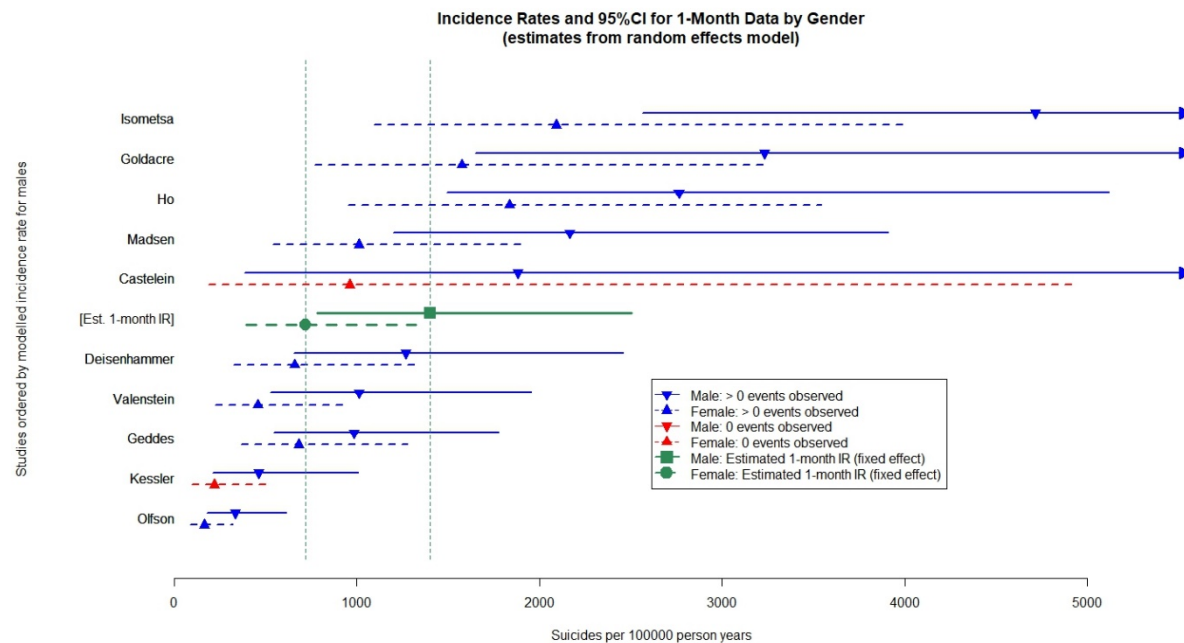

| eSupplement 7. Suicide rates in one week and two-four weeks following discharge from psychiatric hospitalisation |      |              |          |             |           |    |    |
|------------------------------------------------------------------------------------------------------------------|------|--------------|----------|-------------|-----------|----|----|
| Study                                                                                                            | Week | Person years | Observed | IR Observed | IR Fitted | LL | UL |

|    |              |     |          |      |        |        |        |        |
|----|--------------|-----|----------|------|--------|--------|--------|--------|
| 1  | Castelein    | 1   | 8.14     | 1    | 0.1229 | 0.0475 | 0.0074 | 0.3028 |
| 2  | Castelein    | 2-4 | 27.88    | 0    | 0.0000 | 0.0137 | 0.0035 | 0.0532 |
| 3  |              |     |          |      |        |        |        |        |
| 4  | Deisenhammer | 1   | 1262.54  | 25   | 0.0198 | 0.0192 | 0.0089 | 0.0413 |
| 5  | Deisenhammer | 2-4 | 4208.46  | 26   | 0.0062 | 0.0066 | 0.0038 | 0.0114 |
| 6  |              |     |          |      |        |        |        |        |
| 7  | Isometsa     | 1   | 974.00   | 53   | 0.0544 | 0.0582 | 0.0294 | 0.1153 |
| 8  | Isometsa     | 2-4 | 3795.00  | 105  | 0.0277 | 0.0261 | 0.0154 | 0.0443 |
| 9  |              |     |          |      |        |        |        |        |
| 10 | Johansson    | 1   | 74.08    | 4    | 0.0540 | 0.0688 | 0.0246 | 0.1923 |
| 11 | Johansson    | 2-4 | 246.92   | 8    | 0.0324 | 0.0223 | 0.0112 | 0.0444 |
| 12 |              |     |          |      |        |        |        |        |
| 13 | Kessler      | 1   | 1034.00  | 5    | 0.0048 | 0.0063 | 0.0025 | 0.0160 |
| 14 | Kessler      | 2-4 | 3446.75  | 12   | 0.0035 | 0.0034 | 0.0018 | 0.0064 |
| 15 |              |     |          |      |        |        |        |        |
| 16 | Lee          | 1   | 1442.00  | 22   | 0.0153 | 0.0138 | 0.0063 | 0.0305 |
| 17 | Lee          | 2-4 | 4808.00  | 17   | 0.0035 | 0.0043 | 0.0025 | 0.0076 |
| 18 |              |     |          |      |        |        |        |        |
| 19 | Madsen       | 1   | 5518.13  | 175  | 0.0317 | 0.0317 | 0.0166 | 0.0605 |
| 20 | Madsen       | 2-4 | 18393.79 | 199  | 0.0108 | 0.0108 | 0.0064 | 0.0181 |
| 21 |              |     |          |      |        |        |        |        |
| 22 | Olfson       | 1   | 14776.80 | 49   | 0.0033 | 0.0034 | 0.0017 | 0.0068 |
| 23 | Olfson       | 2-4 | 48511.80 | 102  | 0.0021 | 0.0021 | 0.0012 | 0.0036 |
| 24 |              |     |          |      |        |        |        |        |
| 25 | Park         | 1   | 161.60   | 10   | 0.0619 | 0.0711 | 0.0299 | 0.1691 |
| 26 | Park         | 2-4 | 538.65   | 16   | 0.0297 | 0.0240 | 0.0132 | 0.0435 |
| 27 |              |     |          |      |        |        |        |        |
| 28 | Pirkola      | 1   | 6826.92  | 1164 | 0.1705 | 0.1698 | 0.0909 | 0.3173 |
| 29 | Pirkola      | 2-4 | 22756.41 | 534  | 0.0235 | 0.0237 | 0.0142 | 0.0395 |
| 30 |              |     |          |      |        |        |        |        |
| 31 | Pokorny      | 1   | 92.30    | 10   | 0.1083 | 0.0934 | 0.0364 | 0.2393 |
| 32 | Pokorny      | 2-4 | 307.70   | 6    | 0.0195 | 0.0216 | 0.0114 | 0.0409 |
| 33 |              |     |          |      |        |        |        |        |
| 34 | Ruengorn     | 1   | 4.52     | 1    | 0.2212 | 0.0606 | 0.0086 | 0.4286 |
| 35 | Ruengorn     | 2-4 | 15.06    | 0    | 0.0000 | 0.0165 | 0.0039 | 0.0699 |
| 36 |              |     |          |      |        |        |        |        |
| 37 | Seemuller    | 1   | 18.29    | 1    | 0.0547 | 0.0314 | 0.0056 | 0.1751 |
| 38 | Seemuller    | 2-4 | 60.96    | 0    | 0.0000 | 0.0101 | 0.0029 | 0.0347 |
| 39 |              |     |          |      |        |        |        |        |
| 40 | Valenstein   | 1   | 3026.18  | 50   | 0.0165 | 0.0170 | 0.0085 | 0.0339 |
| 41 |              |     |          |      |        |        |        |        |
| 42 |              |     |          |      |        |        |        |        |
| 43 |              |     |          |      |        |        |        |        |
| 44 |              |     |          |      |        |        |        |        |
| 45 |              |     |          |      |        |        |        |        |
| 46 |              |     |          |      |        |        |        |        |

|            |     |          |     |        |        |        |        |
|------------|-----|----------|-----|--------|--------|--------|--------|
| Valenstein | 2-4 | 10123.29 | 77  | 0.0076 | 0.0075 | 0.0044 | 0.0127 |
| Winkler    | 1   | 2640.19  | 131 | 0.0496 | 0.0495 | 0.0256 | 0.0954 |
| Winkler    | 2-4 | 8800.64  | 127 | 0.0144 | 0.0144 | 0.0086 | 0.0243 |

For peer review only

**eSupplement 8. Forrest Plot Suicide rates in one week and two-four weeks following discharge from psychiatric hospitalisation**

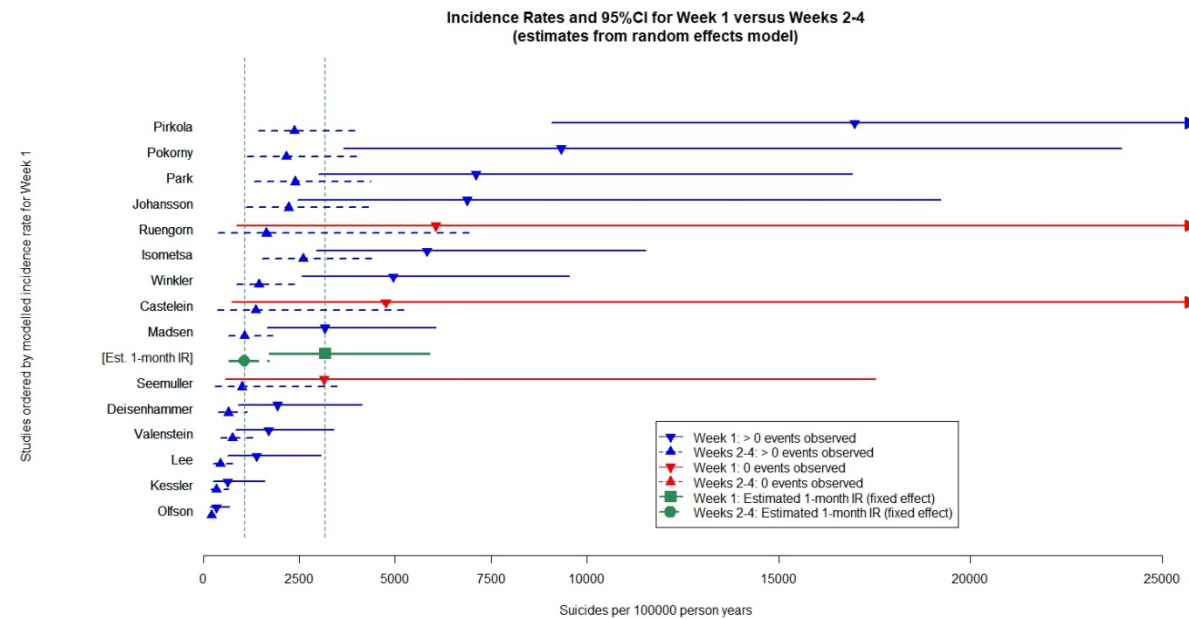

only

**eSupplement 9. Funnel Plot of Suicide rates in one month following discharge from psychiatric hospitalisation**

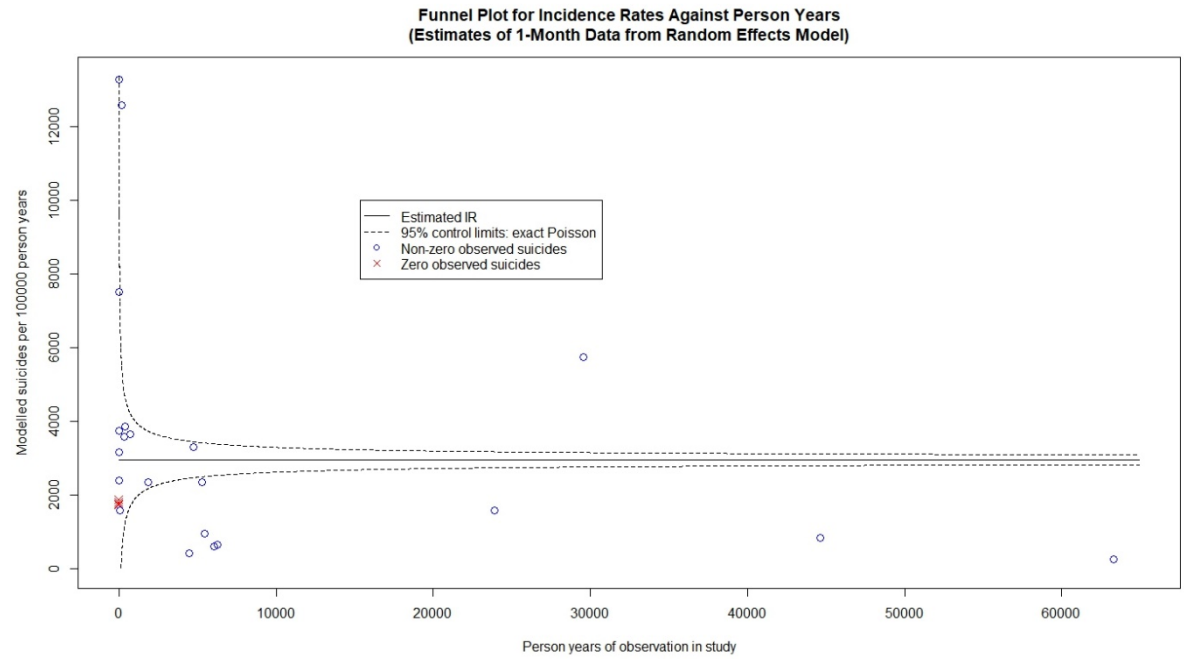

view only

**eSupplement 10. Funnel Plot of Suicide rates in one week following discharge from psychiatric hospitalisation**

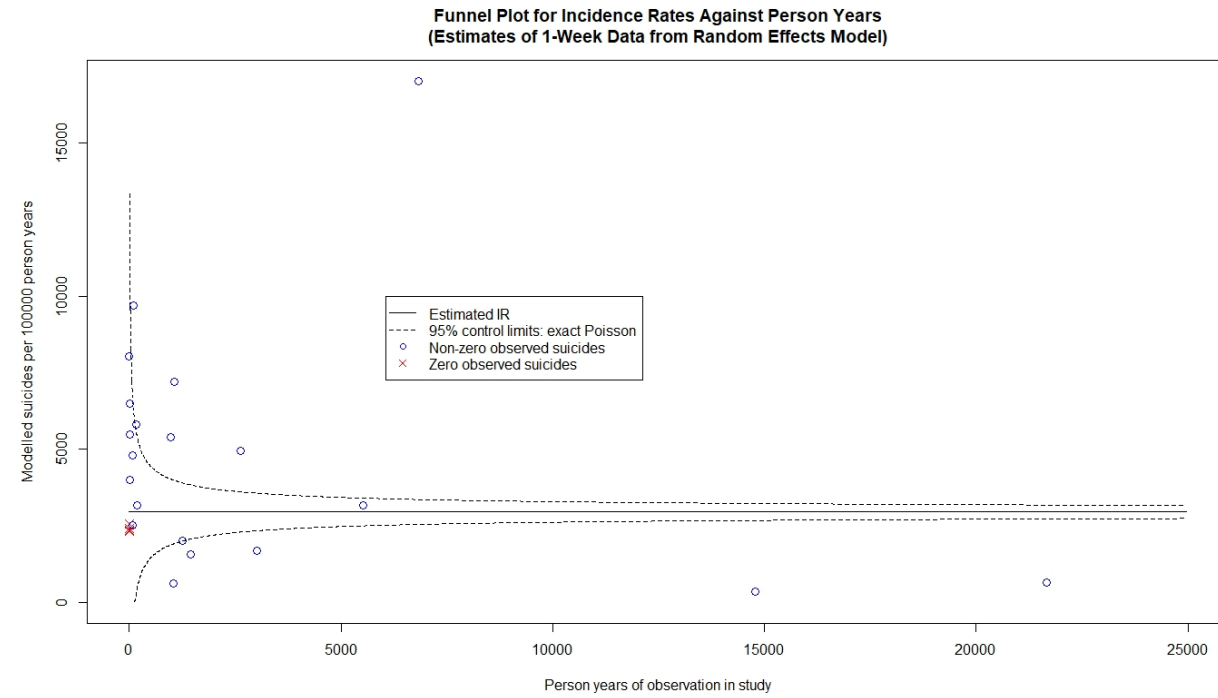

only

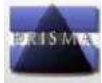

# PRISMA 2009 Checklist

| Section/topic                      | #  | Checklist item                                                                                                                                                                                                                                                                                              | Reported on page # |
|------------------------------------|----|-------------------------------------------------------------------------------------------------------------------------------------------------------------------------------------------------------------------------------------------------------------------------------------------------------------|--------------------|
| <b>TITLE</b>                       |    |                                                                                                                                                                                                                                                                                                             |                    |
| Title                              | 1  | Identify the report as a systematic review, meta-analysis, or both.                                                                                                                                                                                                                                         | 1                  |
| <b>ABSTRACT</b>                    |    |                                                                                                                                                                                                                                                                                                             |                    |
| Structured summary                 | 2  | Provide a structured summary including, as applicable: background; objectives; data sources; study eligibility criteria, participants, and interventions; study appraisal and synthesis methods; results; limitations; conclusions and implications of key findings; systematic review registration number. | 1                  |
| <b>INTRODUCTION</b>                |    |                                                                                                                                                                                                                                                                                                             |                    |
| Rationale                          | 3  | Describe the rationale for the review in the context of what is already known.                                                                                                                                                                                                                              | 3                  |
| Objectives                         | 4  | Provide an explicit statement of questions being addressed with reference to participants, interventions, comparisons, outcomes, and study design (PICOS).                                                                                                                                                  |                    |
| <b>METHODS</b>                     |    |                                                                                                                                                                                                                                                                                                             |                    |
| Protocol and registration          | 5  | Indicate if a review protocol exists, if and where it can be accessed (e.g., Web address), and, if available, provide registration information including registration number.                                                                                                                               | 4                  |
| Eligibility criteria               | 6  | Specify study characteristics (e.g., PICOS, length of follow-up) and report characteristics (e.g., years considered, language, publication status) used as criteria for eligibility, giving rationale.                                                                                                      | 4                  |
| Information sources                | 7  | Describe all information sources (e.g., databases with dates of coverage, contact with study authors to identify additional studies) in the search and date last searched.                                                                                                                                  | 4                  |
| Search                             | 8  | Present full electronic search strategy for at least one database, including any limits used, such that it could be repeated.                                                                                                                                                                               | 4                  |
| Study selection                    | 9  | State the process for selecting studies (i.e., screening, eligibility, included in systematic review, and, if applicable, included in the meta-analysis).                                                                                                                                                   | 4                  |
| Data collection process            | 10 | Describe method of data extraction from reports (e.g., piloted forms, independently, in duplicate) and any processes for obtaining and confirming data from investigators.                                                                                                                                  | 4                  |
| Data items                         | 11 | List and define all variables for which data were sought (e.g., PICOS, funding sources) and any assumptions and simplifications made.                                                                                                                                                                       | 5                  |
| Risk of bias in individual studies | 12 | Describe methods used for assessing risk of bias of individual studies (including specification of whether this was done at the study or outcome level), and how this information is to be used in any data synthesis.                                                                                      | 5                  |
| Summary measures                   | 13 | State the principal summary measures (e.g., risk ratio, difference in means).                                                                                                                                                                                                                               | 5                  |
| Synthesis of results               | 14 | Describe the methods of handling data and combining results of studies, if done, including measures of consistency (e.g., $I^2$ ) for each meta-analysis.                                                                                                                                                   | 5                  |

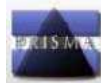

# PRISMA 2009 Checklist

Page 1 of 2

| Section/topic                 | #  | Checklist item                                                                                                                                                                                           | Reported on page # |
|-------------------------------|----|----------------------------------------------------------------------------------------------------------------------------------------------------------------------------------------------------------|--------------------|
| Risk of bias across studies   | 15 | Specify any assessment of risk of bias that may affect the cumulative evidence (e.g., publication bias, selective reporting within studies).                                                             | 5                  |
| Additional analyses           | 16 | Describe methods of additional analyses (e.g., sensitivity or subgroup analyses, meta-regression), if done, indicating which were pre-specified.                                                         | 5                  |
| <b>RESULTS</b>                |    |                                                                                                                                                                                                          |                    |
| Study selection               | 17 | Give numbers of studies screened, assessed for eligibility, and included in the review, with reasons for exclusions at each stage, ideally with a flow diagram.                                          | 28                 |
| Study characteristics         | 18 | For each study, present characteristics for which data were extracted (e.g., study size, PICOS, follow-up period) and provide the citations.                                                             | table 1            |
| Risk of bias within studies   | 19 | Present data on risk of bias of each study and, if available, any outcome level assessment (see item 12).                                                                                                | data supplement    |
| Results of individual studies | 20 | For all outcomes considered (benefits or harms), present, for each study: (a) simple summary data for each intervention group (b) effect estimates and confidence intervals, ideally with a forest plot. | 29                 |
| Synthesis of results          | 21 | Present results of each meta-analysis done, including confidence intervals and measures of consistency.                                                                                                  | 7-9, 29            |
| Risk of bias across studies   | 22 | Present results of any assessment of risk of bias across studies (see Item 15).                                                                                                                          | 9                  |
| Additional analysis           | 23 | Give results of additional analyses, if done (e.g., sensitivity or subgroup analyses, meta-regression [see Item 16]).                                                                                    | 9                  |
| <b>DISCUSSION</b>             |    |                                                                                                                                                                                                          |                    |
| Summary of evidence           | 24 | Summarize the main findings including the strength of evidence for each main outcome; consider their relevance to key groups (e.g., healthcare providers, users, and policy makers).                     | 10                 |
| Limitations                   | 25 | Discuss limitations at study and outcome level (e.g., risk of bias), and at review-level (e.g., incomplete retrieval of identified research, reporting bias).                                            | 11-12              |
| Conclusions                   | 26 | Provide a general interpretation of the results in the context of other evidence, and implications for future research.                                                                                  | 12                 |
| <b>FUNDING</b>                |    |                                                                                                                                                                                                          |                    |
| Funding                       | 27 | Describe sources of funding for the systematic review and other support (e.g., supply of data); role of funders for the systematic review.                                                               | 13                 |

From: Moher D, Liberati A, Tetzlaff J, Altman DG, The PRISMA Group (2009). Preferred Reporting Items for Systematic Reviews and Meta-Analyses: The PRISMA Statement. PLoS Med 6(7): e1000097. doi:10.1371/journal.pmed1000097

For more information, visit: [www.prisma-statement.org](http://www.prisma-statement.org).

For peer review only - <http://bmjopen.bmj.com/site/about/guidelines.xhtml>



# BMJ Open

## Meta-analysis of suicide rates in the first week and first month after psychiatric hospitalisation

|                                 |                                                                                                                                                                                                                                                                                                                                                                                                                |
|---------------------------------|----------------------------------------------------------------------------------------------------------------------------------------------------------------------------------------------------------------------------------------------------------------------------------------------------------------------------------------------------------------------------------------------------------------|
| Journal:                        | <i>BMJ Open</i>                                                                                                                                                                                                                                                                                                                                                                                                |
| Manuscript ID                   | bmjopen-2018-023883.R2                                                                                                                                                                                                                                                                                                                                                                                         |
| Article Type:                   | Research                                                                                                                                                                                                                                                                                                                                                                                                       |
| Date Submitted by the Author:   | 10-Jan-2019                                                                                                                                                                                                                                                                                                                                                                                                    |
| Complete List of Authors:       | Chung, Daniel; The University of New South Wales, School of Psychiatry<br>Hadzi-Pavlovic, Dusan; UNSW Australia,<br>Wang, Maggie; The University of New South Wales, School of Psychiatry<br>Swaraj, Sascha; The University of New South Wales, School of Psychiatry<br>Olfson, Mark; Columbia University, Department of Psychiatry<br>Large, Matthew; The University of New South Wales, School of Psychiatry |
| <b>Primary Subject Heading</b>: | Mental health                                                                                                                                                                                                                                                                                                                                                                                                  |
| Secondary Subject Heading:      | Epidemiology                                                                                                                                                                                                                                                                                                                                                                                                   |
| Keywords:                       | Suicide & self-harm < PSYCHIATRY, Risk management < HEALTH SERVICES ADMINISTRATION & MANAGEMENT, EPIDEMIOLOGY                                                                                                                                                                                                                                                                                                  |
|                                 |                                                                                                                                                                                                                                                                                                                                                                                                                |

SCHOLARONE™  
Manuscripts



## ABSTRACT

### Objective

To assess the magnitude of suicide rates in the first week and first month post-discharge following psychiatric hospitalisation.

### Design

Meta-analysis of relevant English-language, peer-reviewed papers published in Medline, PsychINFO or Embase between 1 January 1945 and 31 March 2017 and supplemented by hand searching and by personal communication. A generalised linear effects model was fitted to the number of suicides, with a Poisson distribution, log link, and log of person years as an offset. A random effects model was used to calculate the over all pooled rates and within subgroups in sensitivity analyses.

### Outcome Measures

Suicides per 100,000 person years in the week and first month after discharge from psychiatric hospitalisation.

### Results

34 included papers comprised 29 studies reported suicides in the first month post-discharge (3,551 suicides during 222,546 patient years) and 24 studies reported suicides in the first week post-discharge (1,928 suicides during 60,880 patient years). The pooled estimate of the suicide rate in the first month post-discharge suicide was 2,060 per 100,000 person years (95% confidence interval (CI) = 1,300 – 3,280,  $I^2=90$ ). The pooled estimate of the suicide rate in the first week post-discharge suicide was 2,950 suicides per 100,000 person years (95% CI = 1,740–5,000,  $I^2 = 88$ ). Eight studies that were included after personal communication had lower pooled rates of suicide than studies included after data extraction and there was evidence of publication bias towards papers reporting a higher rate of post discharge suicide.

## Conclusion

Acknowledging the presence of marked heterogeneity between studies and the likelihood of bias towards publication of studies reporting a higher post discharge suicide rate, the first week and month post-discharge following psychiatric hospitalisation are periods of extraordinary suicide risk. Short-term follow-up of discharged patients should be augmented with greater focus on safe transition from hospital to community care.

## Registration

Prospero registration CRD42016038169

## Funding

No funding source involved.

## Strengths and limitations of this study

- Published and previously unavailable data were synthesised to estimate rates of suicide in the first week and first month post discharge following psychiatric hospitalisation
- Pooled rates of suicide were about 3000 and 2000 per 100,000 person years respectively in the first week and first month post discharge
- Published studies reported higher suicide rates than data obtained by personal communication
- High between study heterogeneity and the likelihood of publication bias towards studies with higher suicide rates may impact the generalizability of our estimated rates
- The period immediately following discharge from psychiatric hospitalisation should be regarded as a distinct phase of care associated with an extraordinary suicide risk.

## Data Sharing

All Individual study data is available in the supplementary material.

For peer review only

## Introduction

A recent meta-analysis of suicide mortality after discharge from psychiatric facilities estimated a rate of 484 per 100,000 person years among 100 studies reporting on suicides after any period of follow up and 1132 suicides per 100,000 person years among 18 studies reporting on suicides in the first three months.<sup>1</sup> These alarming figures suggest that the suicide rate among this vulnerable patient group is about 100 times global suicide rate and that being a recently discharged patient confers a higher risk of suicide death than any other risk factor.<sup>2</sup> However, the earlier meta-analysis did not report estimates over periods shorter than three months<sup>1</sup> because the methods used excluded the duplicated patient samples with smaller number of patient years and because no steps were taken to obtain further data by personal communication. As a result, the earlier study included only two studies that reported suicide rates in the first month post hospital discharge.<sup>1</sup> Although several primary studies have reported on suicide in the immediate post-discharge period<sup>3-5</sup> expected rates of suicide in the first week and month of transition from the hospital to the community remain uncertain. Knowledge of the extent and trajectory of the suicide risk in the weeks following hospital discharge would inform the timing and duration of interventions aimed at reducing these tragic events.

The primary aim of this study was to calculate a pooled estimate and statistical dispersion (range, median and quartile values) of one-week and one-month post-discharge suicide rates. The secondary aim was to examine the possible moderators of the suicide rates over these two periods of follow up according to the characteristics of the primary research.

## Methods

The meta-analysis was registered with PROSPERO<sup>6</sup> (Registration CRD42016038169) and conducted according to PRISMA<sup>7</sup> and MOOSE<sup>8</sup> guidelines.

### Search Strategy and Selection Criteria

We included longitudinal studies that reported the number of person years and the number of suicides in the first week (one-week) and first month (or 28 days) post-discharge (one-month) after discharge from acute adult psychiatric hospitalisation. We defined acute adult psychiatric hospitalisation broadly so as to include hospitalisations, patients admitted with specific psychiatric diagnoses, psychiatric discharges of older people and after psychiatric hospitalisation in military settings. We excluded studies of post-discharge suicide after release from child and adolescent psychiatric wards, long-stay mental health wards, forensic psychiatric facilities, and patients who were admitted to non-psychiatric settings (such as emergency departments or the medical or surgical wards of general hospitals). Studies were excluded if the number of suicides and number of person years were not reported, could not be calculated, or could not be obtained by email from the authors.

Two authors (DC and ML) independently searched Medline, PsychINFO and Embase for relevant papers published in English between 1 January 1945 and 31 March 2017 (See Figure 1, eSupplement 1). Electronic searches were supplemented by hand searches of the relevant review articles and the full text papers located in the searches conducted for a related meta-analysis<sup>1</sup> were re-examined. Grey literature was not considered. DC and ML independently winnowed titles, abstracts, and full text papers. The authors of studies that met inclusion criteria except for reporting post-discharge suicide rates over periods of longer than a month were contacted by email for data regarding suicides in the one-week and one-month periods. Authors of papers that reported post-

1  
2  
3 discharge suicide in one-month but not report one-week and the  
4 converse were also contacted. A total of 27 authors were contacted.  
5  
6

### 7 **Data extraction**

8  
9 SS and MW independently extracted the data and ML and DC  
10 performed a further check of the data. The number of person years  
11 was calculated using the number of discharges and the period of  
12 follow-up of 28 or 31 days when it was not directly reported in the  
13 paper. Where the follow up was specified to be 'one-month' the  
14 length of follow up was assumed to be  $365/12 = 30.4$  days. Separate  
15 figures were extracted for men and women and for the first and  
16 subsequent weeks of follow up where possible.  
17  
18  
19  
20  
21  
22

23  
24 A predetermined list of effect size and moderator variables was  
25 extracted. The variables collected were i) number of suicides and  
26 number of patient years, ii) period of follow up (one-month versus  
27 one week), iii) sex (where specified), iv) diagnostic group (where  
28 specified), v) whether the primary study only included people  
29 admitted for suicidal thoughts and behaviours, vii) country in which  
30 the study was conducted, vii) whether the data were obtained by  
31 personal communication with the authors, and viii) study quality  
32 items.  
33  
34  
35  
36  
37  
38  
39

40  
41 We assessed study quality using a 0-4 point scale derived from the  
42 Newcastle-Ottawa Scale for assessing the quality of nonrandomised  
43 studies<sup>9</sup> and used in a previous meta-analysis of post-discharge  
44 suicide rates.<sup>1</sup> One point was awarded if the study: i) identified  
45 suicides using coroners' records or a national mortality database  
46 (rather than using hospital records), ii) included all the post-  
47 discharge suicides in a defined geographic region (rather than  
48 suicides from a particular care setting), iii) included open verdicts in  
49 suicide numbers; iv) reported the number of discharges (rather than  
50 the number of individuals). Studies with a total quality score of 3 or 4  
51 were regarded as being of higher quality.  
52  
53  
54  
55  
56  
57  
58  
59  
60



## Data analysis

The effect sizes of interest were the incidence rate (IR), expressed as suicides per 100,000 person years and the incidence rate ratio (IRR). In all analyses a generalized linear mixed effects model was fitted to a count response (number of suicides), with a Poisson distribution, log link, and log of person years as an offset allowing the inclusion of fitted values for zero suicide studies. All models included a random effect (intercept) for study. Confidence intervals were based on t-distribution with df equal to the number of studies. All models were fitted with the R package lme4. Standard errors were calculated using the delta method from the R package car. Pre-specified subgroup analyses were conducted according to the period of follow up, source of the data (published or obtained by personal communication), country of publication, sex, and study quality using a mixed effects model. Publication bias was examined directly by i) comparing extracted data to that obtained by personal communication, ii) examination of Funnel Plots and iii) Egger's regression tests based on the fitted values.

## Patient and Public Involvement

The results of this study were discussed with Easter Suburbs Mental Health Service, Consumer Advisory Group for their views on suicide prevention in the suicide in the post discharge period.

## Results

### Search results and data extraction

Independent searches (DC and ML) both identified 24 of 26 papers reporting on suicides occurring in the first week or first month after discharge. A further 8 studies were included after data were provided by personal communication with the authors, such that either one-week or one-month data or both periods was available from 34 papers (Table 1, eSupplement 2.). The earliest study was published in 1983, the median year of publication was 2009 and the most recent was published in 2017. Twenty-nine papers contained data pertaining to the first month post-discharge (eSupplement 3). Twenty-four papers reported on suicides in the first week post-discharge (eSupplement 4).

There were disagreements concerning 6 of the 68 data points relating to either the number of suicides or number of patient years. All disagreements were resolved by a second examination of the data by DC and ML.

### Suicides within a month of discharge

Twenty-nine studies (inclusive of 4 studies with no suicides) reported 3,551 suicides in the first month after discharge during 222,546 person years. The mean number of suicides per study was 122 (SD 443) and the mean number of person years per study was 7,674 (SD 22,581). The median sample suicide rate was 2,333 per 100,000 person years with a range of 0 to 30,252 per 100,000 person years. The first and third quartiles were 601 and 4,555 per 100,000 person years, respectively (see Figure 2. Forrest Plot of suicide rates in one month following discharge from psychiatric hospitalisation). The pooled rate of one-month post-discharge suicide was 2,060 per 100,000 person years (95% CI 1,300–3,280) with very high between-sample heterogeneity ( $Q = 266.8$ ,  $p < 0.001$ ,  $I^2 = 90$ ) (Table 2).

1  
2  
3 Separate data for men and women were available for 10 studies  
4 reporting one-month post-discharge suicides including 6 studies  
5 obtained by personal communication. Men had almost twice the  
6 pooled rate of suicide of women (IRR 1.94 95%, CI 1.54 – 2.44; See  
7 Table 2, eSupplement 5 & 6).  
8  
9  
10

11  
12 Studies of patients admitted for suicidal thoughts or behaviours had  
13 over three times the rate of suicide than studies of psychiatric  
14 patients who were not selected in this way (IRR 3.56, 95% CI 1.29-  
15 7.63) but this result was based on a small number of studies and  
16 suicides among patients presenting with suicidal thoughts or  
17 behaviours. The analysis of suicide rates according to diagnostic  
18 group was also limited by a small number of studies but suggested  
19 that groups of patients with a mood disorder might have higher rates  
20 of one-month post discharge suicide than groups of patients that  
21 were not selected by diagnosis (Table 2).  
22  
23  
24  
25  
26  
27  
28  
29

30 The eight studies deemed to be of low quality had a higher pooled  
31 suicide rate compared to the studies deemed to be of higher quality  
32 (IRR 1.99 95% CI 1.98–2.01). The eight studies from Asian countries  
33 had the highest pooled suicide rate of suicide, followed by the 10  
34 studies from European countries; the five studies from the UK,  
35 Canada, and Australia; while the 6 US studies had the lowest rate  
36 (Table 2).  
37  
38  
39  
40  
41  
42  
43

44 Excluding four studies that reported no suicides, fifteen studies  
45 reported one-month and one-week suicides allowing a direct  
46 comparison of the suicide rates over the first week post-discharge to  
47 the remaining 8-31 days. Among these studies, the one-week pooled  
48 suicide rate was almost three times the rate in the 8-31 day period  
49 (IRR 2.99 95% CI 2.24- 3.97; See Table 2, eSupplement 7 & 8).  
50  
51  
52  
53

54 Data obtained direct extraction from published papers had a  
55 significantly higher one-month post-discharge suicide than data  
56 obtained by personal communication (IRR 3.14, 95% CI 1.29 –  
57 7.63). The Funnel Plot was characterised by 8 studies with lower  
58  
59  
60

1  
2  
3 suicide rates than the pooled estimate and 5 studies with higher  
4 suicide rates than the pooled estimate lying outside the Funnel  
5 (eSupplement 9). An Eggers test confirmed the likelihood of  
6 publication bias towards studies with a higher post discharge suicide  
7 rate (Eggers Bias = 4.94, 95% CI 1.38-8.50, df = 27,  $P < .004$ )  
8  
9

### 15 **Suicide rates in the first week post discharge**

17  
18 24 studies were included in a meta-analysis of one-week post-  
19 discharge suicide rates. These comprised 15 studies reporting  
20 suicides at both one-month and one-week (as above, Table 2), five  
21 studies reporting suicides in one-week but not one month and four  
22 studies with no suicides. The 24 studies reported a total of 1,928  
23 suicides (mean = 80.3 per study, SD= 315.5, median = 8) during  
24 60,880 person years (mean = 2,536.7 per study, SD = 7783, median  
25 = 174.5). The median sample suicide rate was 3,186 per 100,000  
26 person years (range 0–75,000 per 100,000, first quartile = 567, third  
27 quartile = 6,730).  
28  
29

30  
31 The pooled one-month post-discharge suicide rate was 2,950  
32 suicides per 100,000 person years (95% CI 1,740-5,000) with very  
33 high between study heterogeneity ( $Q = 186.4$ ,  $p < 0.0001$ ),  $I^2 = 88$ ).  
34 (Table 3., Figure 3. Forrest Plot of suicide rates in one week  
35 following discharge from psychiatric hospitalisation).  
36  
37

38  
39 Data extracted from published papers had a significantly higher rate  
40 of suicide than personally communicated data (IRR 3.63, 95% CI  
41 1.55 – 8.49). The Funnel Plot was characterised by 5 studies with  
42 lower suicide rates than the pooled estimate and there were 4  
43 studies with higher suicide rates than the pooled estimate lying  
44 outside the Funnel (eSupplement 10). An Eggers test confirmed the  
45 likelihood of publication bias towards studies with a higher post  
46 discharge suicide rate (Eggers Bias = 4.31, 95% CI .85-7.78, df = 22,  
47  $p < .008$ ).  
48  
49  
50  
51  
52  
53  
54  
55  
56  
57  
58  
59  
60

1  
2  
3 Studies considered to have a lower quality had a higher rate of  
4 suicide than those assessed to have a lower quality (IRR 2.83 95%  
5 CI 2.80-2.85).  
6  
7  
8  
9  
10  
11  
12  
13  
14  
15  
16  
17  
18  
19  
20  
21  
22  
23  
24  
25  
26  
27  
28  
29  
30  
31  
32  
33  
34  
35  
36  
37  
38  
39  
40  
41  
42  
43  
44  
45  
46  
47  
48  
49  
50  
51  
52  
53  
54  
55  
56  
57  
58  
59  
60

For peer review only

## Discussion

This study synthesised over thirty years of research on suicide risk during the period immediately following psychiatric hospitalisation. The study builds on a previous meta-analysis of post psychiatric discharge suicide rates<sup>1</sup> by including unpublished data and data that were excluded from an earlier meta-analysis of suicide rates post discharge<sup>1</sup> to estimate suicide rates over the first week and first month post discharge. One-week post-discharge suicide rates were approximately 3,000 suicides per 100,000 person years while one-month rates were approximately 2,000 per 100,000 person years. Rates from the beginning of the second week to the end of the fourth week or one-month post-discharge were approximately 1,000 per 100,000 person years. Rates of 2,000 to 3,000 per 100,000 person years are respectively about 200–300 times the global suicide rate.<sup>10</sup> Our results also compare with a recent meta-analysis that estimated 1,132 suicides per 100,000 person years among 18 studies of the first three months and 484 per 100,000 person years among 100 studies of any period of follow up.<sup>1</sup> This suggests a six-fold risk of suicide in the first week post-discharge compared to the long-term rates of suicide after psychiatric discharge of about 500 per 100,000 person years. It further suggests that length of time since discharge is at least as important as clinical risk factors for suicide (odds ratio = 1.50)<sup>11</sup> and high-risk models for suicide (odds ratio = 4.84)<sup>12</sup> reported in longitudinal studies.<sup>13</sup>

Our finding of higher rates of suicides by men in the immediate post-discharge period is unsurprising because of the preponderance of men among all suicide deaths<sup>10</sup> but is in contrast with less clear gender effects on inpatient suicide rates.<sup>14 15</sup>

The main limitation of our study is uncertainty about the extent to which our pooled estimates can be generalised. We observed very high between-study heterogeneity that may be partially explained by publication bias towards studies with high suicide rates and aspects of study quality. However, in all likelihood there are real differences

1  
2  
3 in post discharge suicide rates between settings that cannot be  
4 examined using the existing literature. Most importantly, this study  
5 was not able to ascertain the role of the availability and quality of  
6 post-discharge care in determining post discharge suicide rates.  
7  
8  
9

10  
11 Our findings emphasise the importance of post-discharge follow up.  
12 Currently in the United States only around half of commercially  
13 insured patients and a third of Medicare patients in the US received  
14 a psychiatric follow-up visit within 7 days of hospital discharge for a  
15 mental illness.<sup>16</sup> In the United Kingdom, the NICE guidelines suggest  
16 that people discharged from mental health settings should be  
17 followed up within seven days.<sup>17</sup> While the introduction of a seven  
18 day follow period is one of a suite of measures that do seem to be  
19 associated lower suicide rates in the UK,<sup>18</sup> it is sobering to consider  
20 that some patients who are scheduled to be followed up at the seven  
21 day mark will die before they are ever reassessed.  
22  
23  
24  
25  
26  
27  
28  
29

30  
31 Very high rates of suicide in the immediate post-discharge period should  
32 encourage clinicians to think carefully about the patient's transition from  
33 hospital to the community. Qualitative research suggests that the transition  
34 from hospital to home is associated with re-emergence of pre-existing social  
35 stresses and new stresses associated with hospitalisation.<sup>19-21</sup> Clinicians  
36 should consider strategies that might improve this transition, including pre-  
37 and post-discharge patient psycho-education, formal needs based  
38 assessments, use of transitional care teams, improved communication  
39 between the inpatient team, and greater involvement of the patient's  
40 outpatient team and family.<sup>22</sup>  
41  
42  
43  
44  
45  
46  
47  
48

49  
50 The high risk of suicide during the period immediately following hospital  
51 discharge provides a clinical rationale for conceptualizing the first post-  
52 discharge month as a distinct phase of recovery and treatment, especially in  
53 the context of pervasive gaps in treatment following psychiatric  
54 hospitalization. Traditional case management approaches to continuity of  
55 care following psychiatric hospitalisation have not consistently yielded  
56 promising results. In one review, two of seven studies of telephone follow-up  
57  
58  
59  
60

1  
2  
3 and one of five studies that involved facilitating communication between  
4 inpatient and outpatient clinicians resulted in a significant increase in  
5 continuity of care <sup>22</sup>. Intensive interventions that involve home visits, social  
6 support, motivational interviewing, and accompanying patients to outpatient  
7 appointments have yielded more encouraging results.<sup>23 24</sup>  
8  
9

10  
11  
12 Other limitations relate to the representativeness of the included  
13 studies. All of the research came from high-income economies of  
14 Asia, Australasia, North America, and Europe and our results might  
15 not be representative of post-discharge suicide in low and middle-  
16 income countries. Moreover, there were an insufficient number of  
17 studies to determine whether apparent differences in suicide rates  
18 between regions were real or were simply the result of available  
19 studies. Differences between rates of post-discharge suicide  
20 between countries are plausible because of differences in national  
21 suicide rates, <sup>10</sup> progress towards deinstitutionalisation, <sup>25</sup> and likely  
22 national differences in the quality of mental health care systems <sup>26</sup>  
23  
24  
25  
26  
27  
28  
29  
30  
31

32  
33 Although it has been argued that one way of combatting post-  
34 discharge suicide is to focus on individual patients with clinical  
35 characteristics that signify a high suicide risk,<sup>27 28</sup> the very high  
36 suicide rates calculated in this study and the known limitations of  
37 suicide risk assessment <sup>29</sup> suggest that a narrow focus on clinical  
38 risk assessment might mislead clinicians into thinking that some  
39 recently discharged psychiatric inpatients can be regarded as being  
40 at low risk post-discharge.<sup>30</sup> Our findings support an approach to  
41 suicide prevention focussed on whole cohorts of discharged  
42 patients.<sup>31</sup>  
43  
44  
45  
46  
47  
48  
49  
50  
51  
52  
53  
54  
55  
56  
57  
58  
59  
60



## **Role of the funding source**

There was no funding source for this study.

## **Conflicts of Interest**

Dr. Olfson reports grants from Janssen Scientific Affairs, outside the submitted work.

## **Author Contribution Statement**

**Study Design; DC, ML**

**Data Collection; DC, ML, MO, SS, MW**

**Data Analysis; DH-P, ML**

**Interpretation and Critical Review; ML, MO, DH-P**

**Manuscript Preparation: DC, DH-P, ML, MO, SS, MW**

Dr Large has full access to all the data in the study and takes responsibility for the integrity of the data and accuracy of the analysis

## **Acknowledgment**

The authors would like to thank the following authors who provided further information about their published studies of suicide after psychiatric hospitalisation: Dr Ebehard Deisenhammer, Dr Erkki Isometsa, Dr Ron Kessler, Dr Edith Liemburg; Dr Natalie Riblet, Dr Marcia Valenstein.

There was no funding source for this study.

## References

1. Chung DT, Ryan CJ, Hadzi-Pavlovic D, Singh SP, Stanton C, Large MM. Suicide Rates After Discharge From Psychiatric Facilities: A Systematic Review and Meta-analysis. *JAMA Psychiatry* 2017;74:694-702.
2. Large M. The role of prediction in suicide prevention. *Dialogues Clin Neurosci* 2018;20:197-205.
3. Ho T-P. The suicide risk of discharged psychiatric patients. *J Clin Psychiatry* 2003;64:702-07.
4. Goldacre M, Seagroatt V, Hawton K. Suicide after discharge from psychiatric inpatient care. *Lancet* 1993;342:283-6.
5. Geddes JR, Juszcak E. Period trends in rate of suicide in first 28 days after discharge from psychiatric hospital in Scotland, 1968-92. *BMJ* 1995;311:357-60.
6. PROSPERO. International prospective register of systematic reviews <https://www.crd.york.ac.uk/prospéro/>
7. Liberati A, Altman DG, Tetzlaff J, et al. The PRISMA statement for reporting systematic reviews and meta-analyses of studies that evaluate health care interventions: explanation and elaboration. *J Clin Epidemiol* 2009;62(10):e1-34. doi: 10.1016/j.jclinepi.2009.06.006
8. Stroup DF, Berlin JA, Morton SC, et al. Meta-analysis of observational studies in epidemiology: a proposal for reporting. Meta-analysis Of Observational Studies in Epidemiology (MOOSE) group. *JAMA* 2000;283:2008-12.
9. Wells GA, Shea B, O'Connell D, et al. The Newcastle-Ottawa Scale (NOS) for assessing the quality of nonrandomised studies in meta-analyses. Accessed from [http://www.ohrica.com/programs/clinical\\_epidemiology/oxfordasp](http://www.ohrica.com/programs/clinical_epidemiology/oxfordasp)
10. Age-standardized suicide rates (per 100 000 population): World Health Organisation 2015 (accessed October 2015 from [http://www.who.int/gho/mental\\_health/suicide\\_rates/en/](http://www.who.int/gho/mental_health/suicide_rates/en/)).
11. Franklin JC, Ribeiro JD, Fox KR, et al. Risk factors for suicidal thoughts and behaviors: A meta-analysis of 50 years of research. *Psychol Bull* 2017;143:187-232.
12. Large M, Kaneson M, Myles N, et al. Meta-Analysis of Longitudinal Cohort Studies of Suicide Risk Assessment among Psychiatric Patients: Heterogeneity in Results and Lack of Improvement over Time. *PLoS One* 2016;11:e0156322.
13. Olfson M, Marcus SC, Bridge JA. Focusing suicide prevention on periods of high risk. *JAMA* 2014;311:1107-8.
14. Large M, Myles N, Myles H, et al. Suicide risk assessment among psychiatric inpatients: a systematic review and meta-analysis of high-risk categories. *Psychol Med* 2018;48:1119-1127
15. Large M, Smith G, Sharma S, et al. Systematic review and meta-analysis of the clinical factors associated with the suicide of psychiatric in-patients. *Acta Psychiatr Scand* 2011;124:18-29.
16. NCQA. Follow-up after hospitalisation for Mental Illness (accessed <http://www.ncqa.org/report-cards/health-plans/state-of-health-care-quality/2017-table-of-contents/follow-up>: National Committee for Quality Assurance; 2016 )
17. NICE. Transition between inpatient mental health settings and community or care home settings: National Institute for Health and Care Excellence, 2016.
18. While D, Bickley H, Roscoe A, et al. Implementation of mental health service recommendations in England and Wales and suicide rates, 1997-2006: a cross-sectional and before-and-after observational study. *Lancet* 2012;379:1005-12.
19. Owen-Smith A, Bennewith O, Donovan J, et al. "When you're in the hospital, you're in a sort of bubble." Understanding the high risk of self-harm and suicide following psychiatric discharge: a qualitative study. *Crisis* 2014;35:154-60

20. Chung DT, Ryan CJ, Large MM. Commentary: Adverse experiences in psychiatric hospitals might be the cause of some postdischarge suicides. *Bull Menninger Clin* 2016;80:371-75.
21. Schechter M, Goldblatt MJ, Ronningstam E, et al. Postdischarge suicide: A psychodynamic understanding of subjective experience and its importance in suicide prevention. *Bull Menninger Clin* 2016;80:80-96.
22. Vigod SN, Kurdyak PA, Dennis CL, et al. Transitional interventions to reduce early psychiatric readmissions in adults: systematic review. *Br J Psychiatry* 2013;202:187-94.
23. Dixon L, Goldberg R, Iannone V, et al. Use of a critical time intervention to promote continuity of care after psychiatric inpatient hospitalization. *Psychiatr Serv* 2009;60:451-8.
24. Shaffer SL, Hutchison SL, Ayers AM, et al. Brief Critical Time Intervention to Reduce Psychiatric Rehospitalization. *Psychiatr Serv* 2015;66:1155-61.
25. Taylor Salisbury T, Killaspy H, King M. An international comparison of the deinstitutionalisation of mental health care: Development and findings of the Mental Health Services Deinstitutionalisation Measure (MENDit). *BMC Psychiatry* 2016;16:54.
26. Spaeth-Ruble B, Pincus HA, Silvestri F, et al. Measuring quality of mental health care: an international comparison. *Int J Environ Res Public Health*. 2014;11(10):10384-9.
27. Berman AL, Silverman MM. Suicide risk assessment and risk formulation part II: suicide risk formulation and the determination of levels of risk. *Suicide Life Threat Behav* 2014;44(4):432-43.
28. Turecki G, Brent DA. Suicide and suicidal behaviour. *Lancet* 2016;387:1227-39.
29. Ryan CJ, Large MM. Suicide risk assessment: where are we now? *Med J Aust* 2013;198(9):462-3.
30. Nordentoft M, Erlangsen A, Madsen T. Postdischarge Suicides: Nightmare and Disgrace. *JAMA Psychiatry* 2016;73(11):1113-14.
31. Olfson M, Marcus SC, Bridge JA. Focusing suicide prevention on periods of high risk. *JAMA* 2014;311:1107-08.
32. Castelein S, Liemburg EJ, de Lange JS, et al. Suicide in Recent Onset Psychosis Revisited: Significant Reduction of Suicide Rate over the Last Two Decades - A Replication Study of a Dutch Incidence Cohort. *PLoS One* 2015;10(6):e0129263.
33. De Leo D, Heller T. Intensive case management in suicide attempters following discharge from psychiatric care. *Aust J Prim Health* 2007;13(3):49-58.
34. Deisenhammer EA, Behrnt E-M, Kemmler G, et al. A comparison of suicides in psychiatric in-patients, after discharge and in not recently hospitalized individuals. *Compr Psychiatry* 2016;69:100-5.
35. Erlangsen A, Zarit SH, Tu X, et al. Suicide among older psychiatric inpatients: an evidence-based study of a high-risk group. *Am J Geriatr Psychiatry*. 2006;14:734-41.
36. Geddes JR, Juszczak E. Period trends in rate of suicide in first 28 days after discharge from psychiatric hospital in Scotland, 1968-92. *BMJ*. 1995;311:357-60
37. Goldacre M, Seagroatt V, Hawton K. Suicide after discharge from psychiatric inpatient care. *Lancet* 1993;342:283-86.
38. Hayashi N, Igarashi M, Imai A, et al. Post-hospitalization course and predictive signs of suicidal behavior of suicidal patients admitted to a psychiatric hospital: a 2-year prospective follow-up study. *BMC Psychiatry* 2012;12(1):1.
39. Healy D, Harris M, Tranter R, et al. Lifetime suicide rates in treated schizophrenia: 1875-1924 and 1994-1998 cohorts compared. *Br J Psychiatry* 2006;188:223-28.
40. Isometsa E, Sund R, Pirkola S. Post-discharge suicides of inpatients with bipolar disorder in Finland. *Bipolar Disord* 2014;16(8):867-74.

- 1
- 2
- 3
- 4 41. Johansson LM, Johansson S-E, Sundquist J, et al. Suicide among psychiatric in-
- 5 patients in Stockholm, Sweden. *Arch Suicide Res* 1996;2(3):171-81.
- 6 42. Kessler RC, Warner CH, Ivany C, et al. Predicting Suicides After Psychiatric
- 7 Hospitalization in US Army Soldiers: The Army Study to Assess Risk and
- 8 Resilience in Servicemembers (Army STARRS). *JAMA Psychiatry* 2015;72(1):49-
- 9 57.
- 10 43. Lee HC, Lin HC. Are psychiatrist characteristics associated with postdischarge
- 11 suicide of schizophrenia patients? *Schizophr Bull* 2009;35:760-5.
- 12 44. Links P, Nisenbaum R, Ambreen M, et al. Prospective study of risk factors for
- 13 increased suicide ideation and behavior following recent discharge. *Gen Hosp*
- 14 *Psychiatry* 2012;34(1):88-97.
- 15 45. Luxton DD, Trofimovich L, Clark LL. Suicide risk among US Service members after
- 16 psychiatric hospitalization, 2001-2011. *Psychiatr Serv* 2013;64:626-9.
- 17 46. Madsen T, Nordentoft M. Changes in inpatient and postdischarge suicide rates in a
- 18 nationwide cohort of Danish psychiatric inpatients, 1998-2005. *J Clin Psychiatry*
- 19 2013;74(12):e1190-4.
- 20 47. Naik PC, Davies S, Buckley AM, et al. Long-term mortality after first psychiatric
- 21 admission. *Br J Psychiatry* 1997;170(1):43-46.
- 22 48. Nyman AK, Jonsson H. Patterns of self-destructive behaviour in schizophrenia. *Acta*
- 23 *Psychiatr Scand* 1986;73(3):252-62.
- 24 49. Olfson M, Wall M, Wang S, et al. Short-term Suicide Risk After Psychiatric Hospital
- 25 Discharge. *JAMA Psychiatry* 2016;73:1119-26.
- 26 50. Park S, Choi JW, Kyoung Yi K, et al. Suicide mortality and risk factors in the 12
- 27 months after discharge from psychiatric inpatient care in Korea: 1989-2006.
- 28 *Psychiatry Res* 2013;208:145-50.
- 29 51. Pedersen CG, Jensen SOW, Gradus J, et al. Systematic suicide risk assessment for
- 30 patients with schizophrenia: a national population-based study. *Psychiatr Serv*
- 31 2014;65:226-31
- 32 52. Pirkola S, Sohlman B, Heilä H, et al. Reductions in postdischarge suicide after
- 33 deinstitutionalization and decentralization: a nationwide register study in
- 34 Finland. *Psychiatr Serv.* 2007;58:221-6
- 35 53. Pokorny AD. Prediction of suicide in psychiatric patients: report of a prospective
- 36 study. *Arch Gen Psychiatry* 1983;40:249-57.
- 37 54. Qurashi I, Kapur N, Appleby L. A prospective study of noncompliance with
- 38 medication, suicidal ideation, and suicidal behavior in recently discharged
- 39 psychiatric inpatients. *Arch Suicide Res* 2006;10:61-7.
- 40 55. Riblet N, Shiner B, Watts BV, et al. Death by Suicide Within 1 Week of Hospital
- 41 Discharge: A Retrospective Study of Root Cause Analysis Reports. *J Nerv Ment Dis*
- 42 2017;205(6):436-42.
- 43 56. Ruengorn C, Sanichwankul K, Niwatananun W, et al. Incidence and risk factors of
- 44 suicide reattempts within 1 year after psychiatric hospital discharge in mood
- 45 disorder patients. *Clin Epidemiol* 2011;3:305-13.
- 46 57. Sani G, Tondo L, Koukopoulos A, et al. Suicide in a large population of former
- 47 psychiatric inpatients. *Psychiatry Clin Neurosci* 2011;65:286-95.
- 48 58. Seemuller F, Meier S, Obermeier M, et al. Three-Year long-term outcome of 458
- 49 naturalistically treated inpatients with major depressive episode: severe relapse
- 50 rates and risk factors. *Eur Arch Psychiatry Clin Neurosci* 2014;264(7):567-75.
- 51 59. Tejedor M, Diaz A, Castillon J, et al. Attempted suicide: repetition and survival
- 52 findings of a follow-up study. *Acta Psychiatr Scand* 1999;100:205-11.
- 53 60. Tsai S-YM, Kuo C-J, Lee H-C. Risk factors for completed suicide in bipolar disorder. *J*
- 54 *Clin Psychiatry* 2002;63:469-76.
- 55 61. Tseng M-C, Cheng I-C, Lee Y-J, et al. Intermediate-term outcome of psychiatric
- 56 inpatients with major depression. *J Formos Med Assoc* 2006;105(8):645-52.
- 57
- 58
- 59
- 60

- 1  
2  
3 62. Valenstein M, Kim HM, Ganoczy D, et al. Higher-risk periods for suicide among VA  
4 patients receiving depression treatment: prioritizing suicide prevention efforts. *J*  
5 *Affect Disord* 2009;112(1-3):50-8.  
6  
7 63. Winkler P, Mlada K, Csemy L, et al. Suicides following inpatient psychiatric  
8 hospitalization: A nationwide case control study. *J Affect Disord* 2015;184:164-9.  
9  
10 64. Yim PH, Yip PS, Li RH, et al. Suicide after discharge from psychiatric inpatient care: a  
11 case-control study in Hong Kong. *Aust N Z J Psychiatry*. 2004;38(1-2):65-72.  
12  
13  
14  
15  
16  
17  
18  
19  
20  
21  
22  
23  
24  
25  
26  
27  
28  
29  
30  
31  
32  
33  
34  
35  
36  
37  
38  
39  
40  
41  
42  
43  
44  
45  
46  
47  
48  
49  
50  
51  
52  
53  
54  
55  
56  
57  
58  
59  
60

## Tables

| Study                                    | Location                                                  | Period    | Suicide Ascertainment              | Type of Patient             | Discharges | Suicides in the first week | Suicides on the first month |
|------------------------------------------|-----------------------------------------------------------|-----------|------------------------------------|-----------------------------|------------|----------------------------|-----------------------------|
| Castelein et al., (2015) <sup>32</sup>   | Psychiatric hospitals in Groningen, the Netherlands       | 2000-2011 | Regional psychiatric case register | Recent onset psychosis      | 424        | 1                          | -                           |
| De Leo & Heller (2007) <sup>33</sup>     | Gold Coast Hospital, Queensland, Australia                | 2002-2005 | Not specified                      | Previous suicide attempters | 60         | 0                          | 0                           |
| Deisenhammer et al. (2016) <sup>34</sup> | Three psychiatric hospitals, Tyrol, Austria               | 2004-2011 | Not specified                      | Unselected adults           | 65,652     | 25                         | 51                          |
| Erlangsen (2006) <sup>35</sup>           | All psychiatric hospitals, Denmark                        | 1990-2001 | Coronial records                   | Adults aged >60 years       | 72,701     | 77                         | -                           |
| Geddes et al. (1997) <sup>36</sup>       | All psychiatric hospitals, Scotland, UK                   | 1968-1993 | Coronial records                   | Unselected adults           | 338,013    | -                          | 367                         |
| Goldacre et al. (1993) <sup>37</sup>     | Hospitals within the Oxford Regional Health Authority, UK | 1979-1986 | Coronial records                   | Unselected adults           | 26,864     | -                          | 44                          |
| Hayashi et al. (2012) <sup>38</sup>      | Tokyo Metropolitan Matsuzawa                              | 2006-2009 | Not specified                      | Admitted suicidal patients  | 3,450      | -                          | 0                           |

|                                        |                                                                      |               |                     |                                                                      |         |     |     |
|----------------------------------------|----------------------------------------------------------------------|---------------|---------------------|----------------------------------------------------------------------|---------|-----|-----|
|                                        | Hospital,<br>Japan                                                   |               |                     |                                                                      |         |     |     |
| Healy et al.<br>(2006) <sup>39</sup>   | Unspecified<br>hospitals,<br>North Wales<br>UK                       | 1994-<br>2003 | Coronial<br>records | Psychotic<br>patients                                                | 133     | -   | 2   |
| Ho (2003) <sup>3</sup>                 | All psychiatric<br>wards and<br>hospitals in<br>Hong Kong,<br>China  | 1997-<br>2000 | Coronial<br>records | Unselected<br>adults                                                 | 21,921  | -   | 124 |
| Isometsa<br>(2014) <sup>40</sup>       | All psychiatric<br>wards and<br>hospitals,<br>Finland                | 1987-<br>2004 | Coronial<br>records | Adults with<br>bipolar<br>disorder                                   | 52,747  | 53  | 158 |
| Johansson<br>(1996) <sup>41</sup>      | All psychiatric<br>inpatients in<br>southern<br>Stockholm,<br>Sweden | 1984-<br>1985 | Coronial<br>records | Unselected<br>adults                                                 | 3,862   | 4   | 12  |
| Kessler et al.<br>(2015) <sup>42</sup> | US Army<br>psychiatric<br>hospitals and<br>wards, USA                | 2004-<br>2009 | Coronial<br>records | US army<br>psychiatric<br>patients                                   | 53,769  | 5   | 17  |
| Lee & Lin<br>(2009) <sup>43</sup>      | All psychiatric<br>wards and<br>hospitals in<br>Taiwan               | 2001-<br>2005 | Coronial<br>records | Patients<br>with<br>schizophre<br>nia                                | 435     | 22  | 39  |
| Links et al.<br>(2012) <sup>44</sup>   | St Michael's<br>Hospital,<br>Toronto,<br>Canada                      | 2007-<br>2009 | Not<br>specified    | Patients<br>with<br>previous<br>suicidal<br>behaviour<br>or ideation | 120     | -   | 3   |
| Luxton et al.<br>(2013) <sup>45</sup>  | US Military<br>treatment<br>facilities, USA                          | 2001-<br>2011 | Coronial<br>records | US service<br>members                                                | 68,947  | -   | 35  |
| Madsen &                               | All psychiatric                                                      | 1998-         | Coronial            | Unselected                                                           | 287,866 | 175 | 374 |



|                                      |                                                            |               |                                          |                                  |          |       |       |
|--------------------------------------|------------------------------------------------------------|---------------|------------------------------------------|----------------------------------|----------|-------|-------|
| Nordentoft (2013) <sup>46</sup>      | wards and hospitals in Denmark                             | 2006          | records                                  | adults                           |          |       |       |
| Naik et al. (1997) <sup>47</sup>     | Saxondale Hospital, Nottinghamshire, England, UK           | 1974-1992     | Local registers and NHS central register | Unselected adults                | 86       | -     | 0     |
| Nyman (1986) <sup>48</sup>           | Unspecified psychiatric hospital, Sweden                   | 1964-1968     | Coronial records                         | Patients with schizophrenia      | 110      |       | 0     |
| Olfson (2016) <sup>49</sup>          | Psychiatric patients from 45 American states               | 2001-2008     | Coronial records                         | Unselected adults                | 770,643  | 49    | 151   |
| Park et al. (2013) <sup>50</sup>     | Asan Medical Center, Seoul, South Korea                    | 1989-2006     | Coronial records                         | Unselected adults                | 8,403    | 10    | 26    |
| Pedersen et al. (2014) <sup>51</sup> | All psychiatric hospitals and wards in Denmark             | 2005-2010     | Coronial records                         | Patients with schizophrenia      | 7,107    | 6     | -     |
| Pirkola et al. (2007) <sup>52</sup>  | All psychiatric hospitals and wards in Finland             | 1985-2001     | Coronial records                         | Unselected adults                | 355,000  | 1,164 | 1,698 |
| Pokorny (1983) <sup>53</sup>         | Houston Veterans Administration Medical Centre, Texas, USA | Not specified | Coronial records                         | Veterans administration patients | 4,800    | 10    | 16    |
| Qurashi et al. (2006) <sup>54</sup>  | Unspecified hospital, Manchester, England, UK              | Not specified | Not specified                            | Unselected adults                | 69       | 1     | -     |
| Riblet (2017)                        | All American                                               | 2002-         | Coronial                                 | Unselected                       | 1,126,17 | 141   | -     |



|                                       |                                                                             |               |                  |                                                     |         |     |     |
|---------------------------------------|-----------------------------------------------------------------------------|---------------|------------------|-----------------------------------------------------|---------|-----|-----|
| 55                                    | Veteran Health mental health inpatient units                                | 2015          | records          | American service-people                             | 9       |     |     |
| Ruengorn et al. (2011) <sup>56</sup>  | Suanprung Psychiatric Hospital, Chiang Mai, Thailand                        | 2007-2010     | Hospital records | Mood disorder patients admitted for suicide attempt | 235     | 1   | 1   |
| Sani et al. (2011) <sup>57</sup>      | Belvedere Montello Hospital, Rome, Italy                                    | 1964-1998     | Coronial records | Unselected adults                                   | 4,441   | 2   | -   |
| Seemuller et al. (2014) <sup>58</sup> | Twelve centres across Germany                                               | Not specified | Study follow up  | Patients with major depression                      | 1,014   | 1   | 1   |
| Tejedor et al. (1999) <sup>59</sup>   | Psychiatric Department of Santa Cruz y San Pablo Hospital, Barcelona, Spain | 1983-1997     | Study follow up  | Suicide attempters                                  | 150     | 0   | 1   |
| Tsai (2002) <sup>60</sup>             | Taipei City Psychiatric Center, Taiwan                                      | 1985-1997     | Coronial Records | Patients with mood disorders                        | 2,133   | 0   | 24  |
| Tseng et al. (2006) <sup>61</sup>     | Unspecified psychosomatic ward, Taiwan                                      | 2000-2002     | Study follow up  | Patients with major depression                      | 67      |     | 2   |
| Valenstein (2009) <sup>62</sup>       | All US veteran psychiatric inpatient facilities                             | 1999-2004     | Coronial data    | American veterans with mood disorders               | 184,093 | 50  | 127 |
| Winkler et al. (2015) <sup>63</sup>   | All psychiatric hospitals and psychiatric                                   | 2006-2012     | Coronial records | Unselected adults                                   | 137,290 | 131 | 258 |

|                          |                                                     |           |                  |                   |       |   |    |
|--------------------------|-----------------------------------------------------|-----------|------------------|-------------------|-------|---|----|
|                          | wards, Czech Republic                               |           |                  |                   |       |   |    |
| Yim (2004) <sup>64</sup> | Pamela Youde Nethersole Eastern Hospital, Hong Kong | 1996-1999 | Coronial records | Unselected adults | 6,292 | - | 20 |

For peer review only

| Table 2. Suicide rates in the first first month post discharge from psychiatric settings |           |          |               |                 |             |             |  |
|------------------------------------------------------------------------------------------|-----------|----------|---------------|-----------------|-------------|-------------|--|
|                                                                                          | N Studies | Suicides | Patient years | Pooled estimate | Lower Limit | Upper Limit |  |
| One month                                                                                | 29        | 3551     | 222546        | 2060            | 1300        | 3280        |  |
| Subgroup of studies reporting follow up at 1 week and 2-4weeks                           |           |          |               |                 |             |             |  |
| One Week                                                                                 | 15        | 1928     | 60854         | 3170            | 1710        | 5890        |  |
| Two to four weeks                                                                        | 15        | 1229     | 115858        | 1060            | 660         | 1070        |  |
| Subgroup of studies reporting suicides by men and women                                  |           |          |               |                 |             |             |  |
| Male                                                                                     | 10        | 917      | 83913         | 1400            | 780         | 2500        |  |
| Female                                                                                   | 10        | 497      | 82989         | 720             | 390         | 1320        |  |
| Subgroup of studies according to data source                                             |           |          |               |                 |             |             |  |
| Extracted directly                                                                       | 22        | 2672     | 107439        | 2880            | 1770        | 4670        |  |
| Personally communicated                                                                  | 7         | 879      | 115107        | 920             | 430         | 1930        |  |
| Subgroups of studies according to selection for suicidal thoughts or behaviours          |           |          |               |                 |             |             |  |
| Admitted with suicidal thoughts or behaviours                                            | 5         | 5        | 56            | 6210            | 1550        | 24860       |  |
| Unselected by suicidally                                                                 | 24        | 3546     | 222490        | 1850            | 1170        | 2920        |  |
| Subgroups of studies according to selection by diagnosis                                 |           |          |               |                 |             |             |  |
| Patients with a mood disorder                                                            | 6         | 312      | 18201         | 3370            | 1240        | 9180        |  |
| Patients with a schizophrenia spectrum disorder                                          | 3         | 41       | 6270          | 1720            | 330         | 9110        |  |

|                                                    |    |      |        |      |      |      |  |
|----------------------------------------------------|----|------|--------|------|------|------|--|
| Unselected by diagnosis                            | 20 | 3198 | 198075 | 1830 | 1080 | 3110 |  |
| Subgroups of studies according to study quality    |    |      |        |      |      |      |  |
| Higher Quality†                                    | 8  | 820  | 73318  | 1360 | 1350 | 1370 |  |
| Lower Quality                                      | 20 | 2731 | 149227 | 2720 | 2690 | 2740 |  |
| Subgroup of studies according to geographic region |    |      |        |      |      |      |  |
| Asia                                               | 8  | 235  | 13000  | 3230 | 1470 | 7100 |  |
| Europe                                             | 10 | 2554 | 75634  | 2340 | 1170 | 4680 |  |
| United States                                      | 6  | 346  | 87376  | 1030 | 450  | 2380 |  |
| United Kingdom, Australia and Canada               | 5  | 416  | 46535  | 2020 | 630  | 6490 |  |
| † one study failed to converge                     |    |      |        |      |      |      |  |

Table 3. Suicide rates in the week month post discharge from psychiatric settings

|                                                 | N Studies | Suicides | Patient years | Pooled estimate | Lower Limit | Upper Limit |  |
|-------------------------------------------------|-----------|----------|---------------|-----------------|-------------|-------------|--|
| One week                                        | 24        | 1928     | 60880         | 2950            | 1740        | 5000        |  |
| Subgroup of studies according to data source    |           |          |               |                 |             |             |  |
| Extracted directly                              | 16        | 1429     | 12605         | 5090            | 2930        | 8840        |  |
| Personally communicated                         | 8         | 499      | 48257         | 1400            | 740         | 2680        |  |
| Subgroups of studies according to study quality |           |          |               |                 |             |             |  |
| Higher Quality                                  | 5         | 246      | 26370         | 3950            | 3910        | 3990        |  |
| Lower Quality                                   | 19        | 1682     | 34492         | 1400            | 1380        | 1410        |  |

1  
2  
3  
4  
5  
6  
7  
8  
9  
10  
11  
12  
13  
14  
15  
16  
17  
18  
19  
20  
21  
22  
23  
24  
25  
26  
27  
28  
29  
30  
31  
32  
33  
34  
35  
36  
37  
38  
39  
40  
41  
42  
43  
44  
45  
46  
47  
48  
49  
50  
51  
52  
53  
54  
55  
56  
57  
58  
59  
60

For peer review only

1  
2  
3  
4  
5  
6  
7  
8  
9  
10  
11  
12  
13  
14  
15  
16  
17  
18  
19  
20  
21  
22  
23  
24  
25  
26  
27  
28  
29  
30  
31  
32  
33  
34  
35  
36  
37  
38  
39  
40  
41  
42  
43  
44  
45  
46  
47  
48  
49  
50  
51  
52  
53  
54  
55  
56  
57  
58  
59  
60

**Figures 1-3**

**Figure 1. Prisma Flow Chart**

**Figure 2. Forrest Plot of suicide rates in one month following discharge from psychiatric hospitalisation**

**Figure 3. Forrest Plot of suicide rates in one week following discharge from psychiatric hospitalisation**

For peer review only

**eSupplements 1-10**

1. Search strategy
2. Strength of reporting items of included studies
3. Suicide rates in one month following discharge from psychiatric hospitalisation
4. Suicide rates in one week following discharge from psychiatric hospitalisation
5. Suicide rates in one month following discharge from psychiatric hospitalisation with gender subgroups.
6. Forest Plot of studies reporting suicides by men and women in one month following discharge from psychiatric hospitalisation
7. Suicide rates in one week and two-four weeks following discharge from psychiatric hospitalisation
8. Forrest Plot Suicide rates in one week and two-four weeks following discharge from psychiatric hospitalisation
9. Funnel Plot of Suicide rates in one month following discharge from psychiatric hospitalisation
10. Funnel Plot of Suicide rates in one week following discharge from psychiatric hospitalisation

**Figure 1. Prisma Flow Chart**



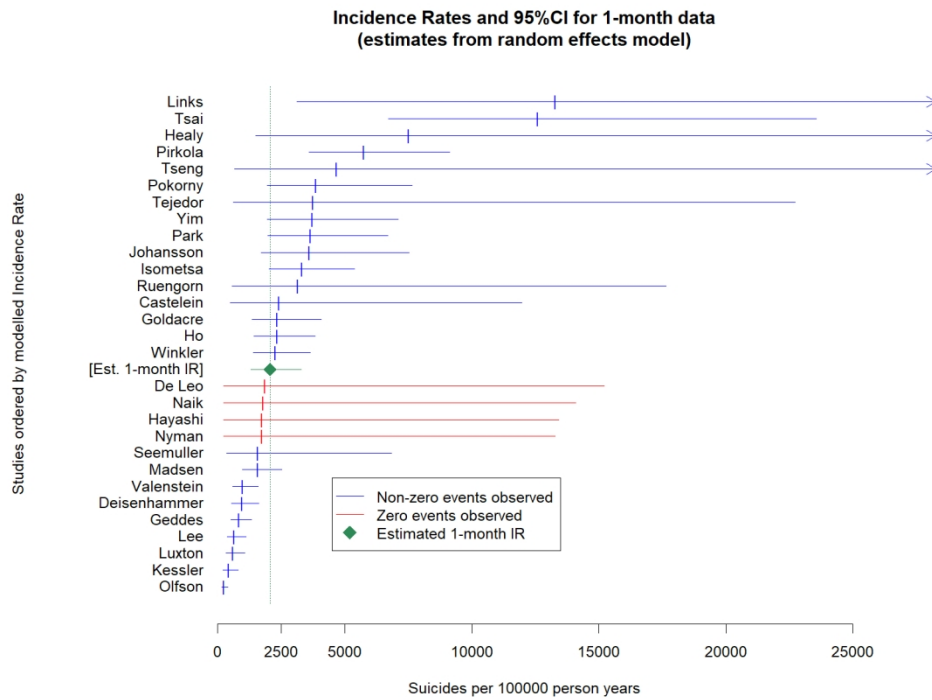

Figure 2. Forest plot of studies reporting suicide rates in the first-month post discharge

279x203mm (150 x 150 DPI)

1  
2  
3  
4  
5  
6  
7  
8  
9  
10  
11  
12  
13  
14  
15  
16  
17  
18  
19  
20  
21  
22  
23  
24  
25  
26  
27  
28  
29  
30  
31  
32  
33  
34  
35  
36  
37  
38  
39  
40  
41  
42  
43  
44  
45  
46  
47  
48  
49  
50  
51  
52  
53  
54  
55  
56  
57  
58  
59  
60

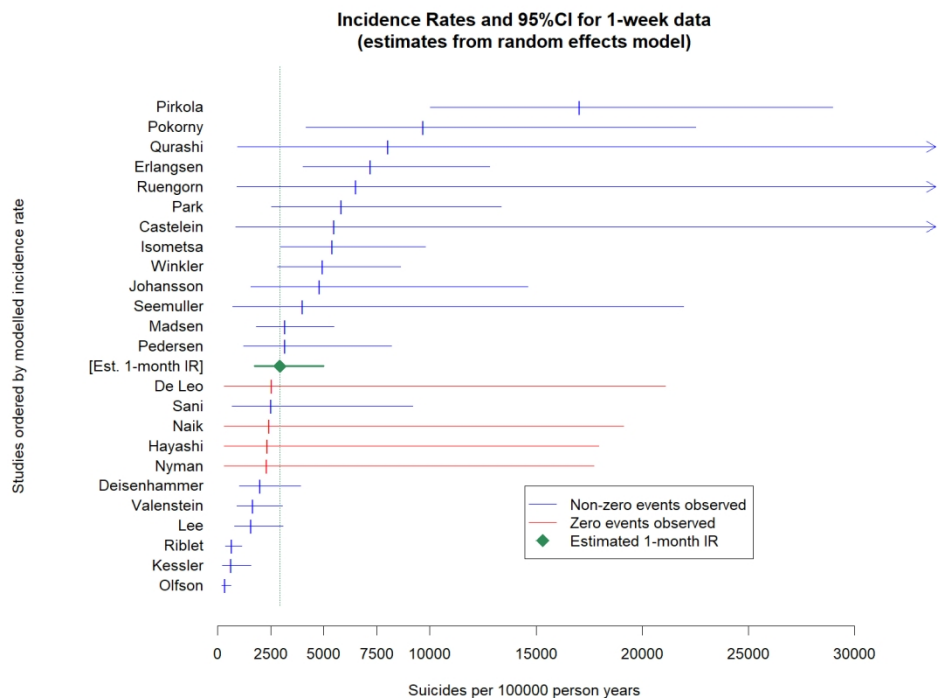

Figure 3. Forest plot of studies reporting suicide rates in the first-week post discharge  
279x203mm (150 x 150 DPI)

1  
2 eSupplement 1. Search Strategy

3  
4 Data bases Medline, PsychINFO and Embase

5  
6 Dates January 1945 and 31 March 2017:

7  
8 Limits. English Language

9  
10 Search Terms 1. ((suicid\*).ti AND (hospital or discharg\* OR inpatient or in-patient OR admit\*). ab

11  
12 Search Terms 2. ((mortality OR outcome\* OR death\*) AND (psych\* OR mental\*).ti. AND (admit\* OR admis\* or hospital\* OR inpatient\* OR in-patient\* OR discharg\*).ab

13  
14  
15 eSupplement 2. Strength of reporting items of included studies

| 16 Study name        | 17 Coronial Verdicts | 18 Counts admissions | 19 Defined Population | 20 Includes Undetermined deaths | 21 Strength of Reporting Score |
|----------------------|----------------------|----------------------|-----------------------|---------------------------------|--------------------------------|
| 22 Castelein 2015    | 23 0                 | 24 0                 | 25 1                  | 26 0                            | 27 1                           |
| 28 De Leo 2007       | 29 0                 | 30 0                 | 31 0                  | 32 0                            | 33 0                           |
| 34 Erlangsen 2006    | 35 1                 | 36 0                 | 37 1                  | 38 0                            | 39 2                           |
| 40 Deisenhammer 2016 | 41 1                 | 42 1                 | 43 1                  | 44 0                            | 45 3                           |
| 46 Geddes 1997       | 47 1                 | 48 0                 | 49 1                  | 50 1                            | 51 3                           |
| 52 Goldacre 1993     | 53 1                 | 54 1                 | 55 1                  | 56 1                            | 57 4                           |
| 58 Hayashi 2012      | 59 0                 | 60 0                 | 61 0                  | 62 0                            | 63 0                           |
| 64 Healy 2006        | 65 1                 | 66 0                 | 67 1                  | 68 0                            | 69 2                           |
| 70 Ho 2003           | 71 1                 | 72 0                 | 73 1                  | 74 1                            | 75 3                           |
| 76 Isometsa 2014     | 77 1                 | 78 1                 | 79 1                  | 80 0                            | 81 3                           |
| 82 Johansson 1996    | 83 1                 | 84 0                 | 85 0                  | 86 1                            | 87 2                           |
| 88 Kessler 2015      | 89 1                 | 90 1                 | 91 1                  | 92 0                            | 93 3                           |
| 94 Lee 2009          | 95 1                 | 96 1                 | 97 1                  | 98 0                            | 99 3                           |
| 100 Links 2012       | 101 0                | 102 0                | 103 0                 | 104 0                           | 105 0                          |
| 106 Luxton 2013      | 107 1                | 108 0                | 109 1                 | 110 0                           | 111 2                          |
| 112 Madsen 2013      | 113 1                | 114 0                | 115 1                 | 116 0                           | 117 2                          |
| 118 Naik 1997        | 119 1                | 120 0                | 121 0                 | 122 0                           | 123 1                          |
| 124 Nyman 1986       | 125 1                | 126 1                | 127 0                 | 128 0                           | 129 2                          |
| 130 Olfson 2016      | 131 1                | 132 0                | 133 1                 | 134 0                           | 135 2                          |
| 136 Park 2013        | 137 1                | 138 0                | 139 0                 | 140 0                           | 141 1                          |

|    |                 |   |   |   |   |   |
|----|-----------------|---|---|---|---|---|
| 1  | Pedersen        | 1 | 0 | 1 | 0 | 2 |
| 2  | Pirkola 2007    | 1 | 0 | 1 | 0 | 2 |
| 3  | Pokorny 1983    | 1 | 0 | 0 | 0 | 1 |
| 4  | Qurashi 2006    | 0 | 0 | 0 | 0 | 0 |
| 5  | Riblet 2017     | 1 | 1 | 1 | 0 | 3 |
| 6  | Ruengorn 2011   | 0 | 0 | 0 | 0 | 0 |
| 7  | Sani 2011       | 1 | 0 | 0 | 0 | 1 |
| 9  | Seemuller 2014  | 0 | 0 | 0 | 0 | 0 |
| 10 | Tejedor 1999    | 0 | 0 | 0 | 0 | 0 |
| 11 | Tsai 2002       | 0 | 0 | 0 | 0 | 0 |
| 12 | Tseng 2006      | 0 | 0 | 0 | 0 | 0 |
| 13 | Valenstein 2009 | 1 | 0 | 1 | 0 | 2 |
| 14 | Winkler 2015    | 1 | 0 | 1 | 0 | 2 |
| 15 | Yim2004         | 1 | 0 | 1 | 1 | 3 |

| eSupplement 3 – Suicide rates in one month following discharge from psychiatric hospitalisation |              |          |          |            |        |        |
|-------------------------------------------------------------------------------------------------|--------------|----------|----------|------------|--------|--------|
| Study                                                                                           | Person years | Suicides | Observed | Fitted     | LL     | UL     |
| Castelein                                                                                       | 36.01        | 1        | 0.0278   | 0.024<br>0 | 0.0048 | 0.1196 |
| De Leo                                                                                          | 5.00         | 0        | 0.0000   | 0.018<br>6 | 0.0023 | 0.1521 |
| Deisenhammer                                                                                    | 5471.00      | 51       | 0.0093   | 0.009<br>5 | 0.0055 | 0.0162 |
| Geddes                                                                                          | 44634.2<br>0 | 367      | 0.0082   | 0.008<br>2 | 0.0051 | 0.0132 |
| Goldacre                                                                                        | 1875.00      | 44       | 0.0235   | 0.023<br>4 | 0.0134 | 0.0407 |
| Hayashi                                                                                         | 8.83         | 0        | 0.0000   | 0.017      | 0.0023 | 0.1342 |

|           |              |      |        |            |        |        |
|-----------|--------------|------|--------|------------|--------|--------|
|           |              |      |        | 4          |        |        |
| Healy     | 11.08        | 2    | 0.1805 | 0.075<br>1 | 0.0149 | 0.3795 |
| Ho        | 5314.00      | 124  | 0.0233 | 0.023<br>3 | 0.0142 | 0.0383 |
| Isometsa  | 4769.00      | 158  | 0.0331 | 0.033<br>0 | 0.0202 | 0.0540 |
| Johansson | 321.00       | 12   | 0.0374 | 0.035<br>8 | 0.0171 | 0.0753 |
| Kessler   | 4480.75      | 17   | 0.0038 | 0.004<br>1 | 0.0021 | 0.0079 |
| Lee       | 6250.00      | 39   | 0.0062 | 0.006<br>4 | 0.0037 | 0.0112 |
| Links     | 9.92         | 3    | 0.3025 | 0.132<br>9 | 0.0312 | 0.5653 |
| Luxton    | 6050.13      | 35   | 0.0058 | 0.006<br>0 | 0.0034 | 0.0106 |
| Madsen    | 23911.9<br>2 | 374  | 0.0156 | 0.015<br>7 | 0.0097 | 0.0252 |
| Naik      | 7.25         | 0    | 0.0000 | 0.017<br>9 | 0.0023 | 0.1409 |
| Nyman     | 9.17         | 0    | 0.0000 | 0.017<br>3 | 0.0023 | 0.1328 |
| Olfson    | 63288.6<br>0 | 151  | 0.0024 | 0.002<br>4 | 0.0015 | 0.0039 |
| Park      | 700.25       | 26   | 0.0371 | 0.036<br>4 | 0.0198 | 0.0670 |
| Pirkola   | 29583.3<br>3 | 1698 | 0.0574 | 0.057<br>4 | 0.0360 | 0.0914 |
| Pokorny   | 400.00       | 16   | 0.0400 | 0.038<br>6 | 0.0194 | 0.0766 |
| Ruengorn  | 19.58        | 1    | 0.0511 | 0.031<br>5 | 0.0056 | 0.1763 |
| Seemuller | 79.25        | 1    | 0.0126 | 0.015<br>7 | 0.0036 | 0.0683 |

|    |            |             |     |        |           |        |        |
|----|------------|-------------|-----|--------|-----------|--------|--------|
| 1  | Tejedor    | 12.50       | 1   | 0.0800 | $0.037_3$ | 0.0061 | 0.2272 |
| 2  |            |             |     |        |           |        |        |
| 3  | Tsai       | 177.75      | 24  | 0.1350 | $0.125_8$ | 0.0672 | 0.2357 |
| 4  |            |             |     |        |           |        |        |
| 5  | Tseng      | 5.58        | 1   | 0.1791 | $0.046_8$ | 0.0066 | 0.3289 |
| 6  |            |             |     |        |           |        |        |
| 7  |            |             |     |        |           |        |        |
| 8  | Valenstein | $13149.4_7$ | 127 | 0.0097 | $0.009_7$ | 0.0059 | 0.0160 |
| 9  |            |             |     |        |           |        |        |
| 10 | Winkler    | $11440.8_3$ | 258 | 0.0226 | $0.022_5$ | 0.0140 | 0.0364 |
| 11 |            |             |     |        |           |        |        |
| 12 |            |             |     |        |           |        |        |
| 13 | Yim        | 524.33      | 20  | 0.0381 | $0.037_1$ | 0.0194 | 0.0710 |
| 14 |            |             |     |        |           |        |        |
| 15 |            |             |     |        |           |        |        |
| 16 |            |             |     |        |           |        |        |
| 17 |            |             |     |        |           |        |        |
| 18 |            |             |     |        |           |        |        |
| 19 |            |             |     |        |           |        |        |
| 20 |            |             |     |        |           |        |        |
| 21 |            |             |     |        |           |        |        |
| 22 |            |             |     |        |           |        |        |
| 23 |            |             |     |        |           |        |        |
| 24 |            |             |     |        |           |        |        |
| 25 |            |             |     |        |           |        |        |
| 26 |            |             |     |        |           |        |        |
| 27 |            |             |     |        |           |        |        |
| 28 |            |             |     |        |           |        |        |
| 29 |            |             |     |        |           |        |        |
| 30 |            |             |     |        |           |        |        |
| 31 |            |             |     |        |           |        |        |
| 32 |            |             |     |        |           |        |        |
| 33 |            |             |     |        |           |        |        |
| 34 |            |             |     |        |           |        |        |
| 35 |            |             |     |        |           |        |        |
| 36 |            |             |     |        |           |        |        |
| 37 |            |             |     |        |           |        |        |
| 38 |            |             |     |        |           |        |        |
| 39 |            |             |     |        |           |        |        |
| 40 |            |             |     |        |           |        |        |
| 41 |            |             |     |        |           |        |        |
| 42 |            |             |     |        |           |        |        |
| 43 |            |             |     |        |           |        |        |
| 44 |            |             |     |        |           |        |        |
| 45 |            |             |     |        |           |        |        |
| 46 |            |             |     |        |           |        |        |

eSupplement 4. Suicide rates in one week following discharge from psychiatric hospitalisation

| Study        | Person years | Observed | Observed | Fitted | LL     | UL     |
|--------------|--------------|----------|----------|--------|--------|--------|
| Castelein    | 8.14         | 1        | 0.1229   | 0.0548 | 0.0085 | 0.3523 |
| DeLeo        | 5.00         | 0        | 0.0000   | 0.0255 | 0.0031 | 0.2109 |
| Deisenhammer | 1262.54      | 25       | 0.0198   | 0.0201 | 0.0103 | 0.0390 |
| Erlangen     | 1058.72      | 77       | 0.0727   | 0.0720 | 0.0404 | 0.1283 |
| Hayashi      | 8.83         | 0        | 0.0000   | 0.0234 | 0.0030 | 0.1796 |
| Isometsa     | 974.00       | 53       | 0.0544   | 0.0539 | 0.0296 | 0.0980 |
| Johansson    | 74.08        | 4        | 0.0540   | 0.0481 | 0.0158 | 0.1461 |
| Kessler      | 1034.00      | 5        | 0.0048   | 0.0062 | 0.0024 | 0.0157 |
| Lee          | 1442.00      | 22       | 0.0153   | 0.0156 | 0.0079 | 0.0308 |
| Madsen       | 5518.13      | 175      | 0.0317   | 0.0317 | 0.0183 | 0.0550 |
| Naik         | 7.25         | 0        | 0.0000   | 0.0242 | 0.0031 | 0.1911 |
| Nyman        | 9.17         | 0        | 0.0000   | 0.0232 | 0.0030 | 0.1773 |
| Olfson       | 14776.80     | 49       | 0.0033   | 0.0034 | 0.0019 | 0.0063 |
| Park         | 161.60       | 10       | 0.0619   | 0.0581 | 0.0253 | 0.1336 |
| Pedersen     | 187.40       | 6        | 0.0320   | 0.0317 | 0.0123 | 0.0819 |
| Pirkola      | 6826.92      | 1164     | 0.1705   | 0.1703 | 0.1001 | 0.2896 |
| Pokorny      | 92.30        | 10       | 0.1083   | 0.0968 | 0.0417 | 0.2252 |
| Qurashi      | 1.33         | 1        | 0.7536   | 0.0803 | 0.0095 | 0.6766 |

|            |          |     |        |        |        |        |
|------------|----------|-----|--------|--------|--------|--------|
| Riblet     | 21657.30 | 141 | 0.0065 | 0.0066 | 0.0038 | 0.0115 |
| Ruengorn   | 4.52     | 1   | 0.2212 | 0.0650 | 0.0091 | 0.4651 |
| Sani       | 85.31    | 2   | 0.0234 | 0.0251 | 0.0069 | 0.0919 |
| Seemuller  | 18.29    | 1   | 0.0547 | 0.0399 | 0.0073 | 0.2194 |
| Valenstein | 3026.18  | 50  | 0.0165 | 0.0167 | 0.0091 | 0.0304 |
| Winkler    | 2640.19  | 131 | 0.0496 | 0.0494 | 0.0283 | 0.0863 |

eSupplement 5 – Suicide rates in one month following discharge from psychiatric hospitalisation with gender subgroups.

| Study        | Sex | Person years | Suicides | Residual | Observed | Fitted | LL     | UL     |
|--------------|-----|--------------|----------|----------|----------|--------|--------|--------|
| Castelein    | F   | 10.36        | 0        | -0.447   | 0.0000   | 0.0096 | 0.0019 | 0.0491 |
| Castelein    | M   | 25.65        | 1        | 0.646    | 0.0390   | 0.0188 | 0.0039 | 0.0921 |
| Deisenhammer | F   | 3006.00      | 20       | 0.026    | 0.0067   | 0.0066 | 0.0033 | 0.0133 |
| Deisenhammer | M   | 2465.00      | 31       | -0.045   | 0.0126   | 0.0127 | 0.0066 | 0.0246 |
| Geddes       | F   | 24113.30     | 171      | 0.477    | 0.0071   | 0.0068 | 0.0037 | 0.0128 |
| Geddes       | M   | 20520.90     | 196      | -0.456   | 0.0096   | 0.0099 | 0.0055 | 0.0178 |
| Goldacre     | F   | 1072.00      | 16       | -0.205   | 0.0149   | 0.0158 | 0.0077 | 0.0322 |
| Goldacre     | M   | 803.00       | 28       | 0.383    | 0.0349   | 0.0323 | 0.0165 | 0.0633 |
| Ho           | F   | 2582.00      | 53       | 0.830    | 0.0205   | 0.0184 | 0.0095 | 0.0354 |
| Ho           | M   | 2732.00      | 71       | -0.543   | 0.0260   | 0.0276 | 0.0149 | 0.0512 |
| Isometsa     | F   | 2614.00      | 52       | -0.352   | 0.0199   | 0.0209 | 0.0110 | 0.0400 |
| Isometsa     | M   | 2155.00      | 106      | 0.413    | 0.0492   | 0.0471 | 0.0256 | 0.0867 |
| Kessler      | F   | 887.64       | 0        | -2.004   | 0.0000   | 0.0022 | 0.0010 | 0.0050 |
| Kessler      | M   | 3593.11      | 17       | 0.096    | 0.0047   | 0.0046 | 0.0021 | 0.0101 |
| Madsen       | F   | 12533.41     | 125      | -0.171   | 0.0100   | 0.0101 | 0.0054 | 0.0189 |



|            |   |          |     |        |        |        |        |        |
|------------|---|----------|-----|--------|--------|--------|--------|--------|
| Madsen     | M | 11378.51 | 249 | 0.157  | 0.0219 | 0.0217 | 0.0120 | 0.0391 |
| Olfson     | F | 35113.50 | 58  | -0.181 | 0.0017 | 0.0017 | 0.0009 | 0.0032 |
| Olfson     | M | 28175.10 | 93  | -0.069 | 0.0033 | 0.0033 | 0.0018 | 0.0061 |
| Valenstein | F | 1065.11  | 2   | -1.504 | 0.0019 | 0.0046 | 0.0023 | 0.0092 |
| Valenstein | M | 12084.36 | 125 | 0.215  | 0.0103 | 0.0101 | 0.0053 | 0.0196 |

**eSupplement 6. Forest Plot of studies reporting suicides by men and women in one month following discharge from psychiatric hospitalisation**

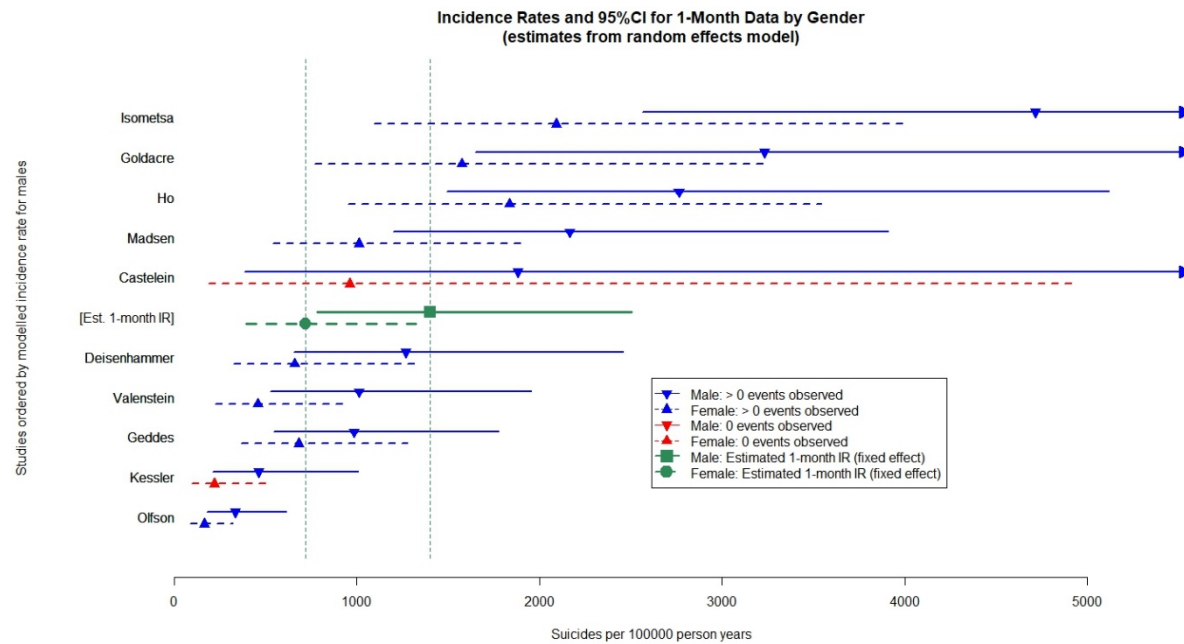

| eSupplement 7. Suicide rates in one week and two-four weeks following discharge from psychiatric hospitalisation |      |              |          |             |           |    |    |
|------------------------------------------------------------------------------------------------------------------|------|--------------|----------|-------------|-----------|----|----|
| Study                                                                                                            | Week | Person years | Observed | IR Observed | IR Fitted | LL | UL |

|    |              |     |          |      |        |        |        |        |
|----|--------------|-----|----------|------|--------|--------|--------|--------|
| 1  | Castelein    | 1   | 8.14     | 1    | 0.1229 | 0.0475 | 0.0074 | 0.3028 |
| 2  | Castelein    | 2-4 | 27.88    | 0    | 0.0000 | 0.0137 | 0.0035 | 0.0532 |
| 3  |              |     |          |      |        |        |        |        |
| 4  | Deisenhammer | 1   | 1262.54  | 25   | 0.0198 | 0.0192 | 0.0089 | 0.0413 |
| 5  | Deisenhammer | 2-4 | 4208.46  | 26   | 0.0062 | 0.0066 | 0.0038 | 0.0114 |
| 6  |              |     |          |      |        |        |        |        |
| 7  | Isometsa     | 1   | 974.00   | 53   | 0.0544 | 0.0582 | 0.0294 | 0.1153 |
| 8  | Isometsa     | 2-4 | 3795.00  | 105  | 0.0277 | 0.0261 | 0.0154 | 0.0443 |
| 9  |              |     |          |      |        |        |        |        |
| 10 | Johansson    | 1   | 74.08    | 4    | 0.0540 | 0.0688 | 0.0246 | 0.1923 |
| 11 | Johansson    | 2-4 | 246.92   | 8    | 0.0324 | 0.0223 | 0.0112 | 0.0444 |
| 12 |              |     |          |      |        |        |        |        |
| 13 | Kessler      | 1   | 1034.00  | 5    | 0.0048 | 0.0063 | 0.0025 | 0.0160 |
| 14 | Kessler      | 2-4 | 3446.75  | 12   | 0.0035 | 0.0034 | 0.0018 | 0.0064 |
| 15 |              |     |          |      |        |        |        |        |
| 16 | Lee          | 1   | 1442.00  | 22   | 0.0153 | 0.0138 | 0.0063 | 0.0305 |
| 17 | Lee          | 2-4 | 4808.00  | 17   | 0.0035 | 0.0043 | 0.0025 | 0.0076 |
| 18 |              |     |          |      |        |        |        |        |
| 19 | Madsen       | 1   | 5518.13  | 175  | 0.0317 | 0.0317 | 0.0166 | 0.0605 |
| 20 | Madsen       | 2-4 | 18393.79 | 199  | 0.0108 | 0.0108 | 0.0064 | 0.0181 |
| 21 |              |     |          |      |        |        |        |        |
| 22 | Olfson       | 1   | 14776.80 | 49   | 0.0033 | 0.0034 | 0.0017 | 0.0068 |
| 23 | Olfson       | 2-4 | 48511.80 | 102  | 0.0021 | 0.0021 | 0.0012 | 0.0036 |
| 24 |              |     |          |      |        |        |        |        |
| 25 | Park         | 1   | 161.60   | 10   | 0.0619 | 0.0711 | 0.0299 | 0.1691 |
| 26 | Park         | 2-4 | 538.65   | 16   | 0.0297 | 0.0240 | 0.0132 | 0.0435 |
| 27 |              |     |          |      |        |        |        |        |
| 28 | Pirkola      | 1   | 6826.92  | 1164 | 0.1705 | 0.1698 | 0.0909 | 0.3173 |
| 29 | Pirkola      | 2-4 | 22756.41 | 534  | 0.0235 | 0.0237 | 0.0142 | 0.0395 |
| 30 |              |     |          |      |        |        |        |        |
| 31 | Pokorny      | 1   | 92.30    | 10   | 0.1083 | 0.0934 | 0.0364 | 0.2393 |
| 32 | Pokorny      | 2-4 | 307.70   | 6    | 0.0195 | 0.0216 | 0.0114 | 0.0409 |
| 33 |              |     |          |      |        |        |        |        |
| 34 | Ruengorn     | 1   | 4.52     | 1    | 0.2212 | 0.0606 | 0.0086 | 0.4286 |
| 35 | Ruengorn     | 2-4 | 15.06    | 0    | 0.0000 | 0.0165 | 0.0039 | 0.0699 |
| 36 |              |     |          |      |        |        |        |        |
| 37 | Seemuller    | 1   | 18.29    | 1    | 0.0547 | 0.0314 | 0.0056 | 0.1751 |
| 38 | Seemuller    | 2-4 | 60.96    | 0    | 0.0000 | 0.0101 | 0.0029 | 0.0347 |
| 39 |              |     |          |      |        |        |        |        |
| 40 | Valenstein   | 1   | 3026.18  | 50   | 0.0165 | 0.0170 | 0.0085 | 0.0339 |
| 41 |              |     |          |      |        |        |        |        |
| 42 |              |     |          |      |        |        |        |        |
| 43 |              |     |          |      |        |        |        |        |
| 44 |              |     |          |      |        |        |        |        |
| 45 |              |     |          |      |        |        |        |        |
| 46 |              |     |          |      |        |        |        |        |

|            |     |          |     |        |        |        |        |
|------------|-----|----------|-----|--------|--------|--------|--------|
| Valenstein | 2-4 | 10123.29 | 77  | 0.0076 | 0.0075 | 0.0044 | 0.0127 |
| Winkler    | 1   | 2640.19  | 131 | 0.0496 | 0.0495 | 0.0256 | 0.0954 |
| Winkler    | 2-4 | 8800.64  | 127 | 0.0144 | 0.0144 | 0.0086 | 0.0243 |

For peer review only

**eSupplement 8. Forrest Plot Suicide rates in one week and two-four weeks following discharge from psychiatric hospitalisation**



only

**eSupplement 9. Funnel Plot of Suicide rates in one month following discharge from psychiatric hospitalisation**



view only

**eSupplement 10. Funnel Plot of Suicide rates in one week following discharge from psychiatric hospitalisation**



only



# PRISMA 2009 Checklist

| Section/topic                      | #  | Checklist item                                                                                                                                                                                                                                                                                              | Reported on page # |
|------------------------------------|----|-------------------------------------------------------------------------------------------------------------------------------------------------------------------------------------------------------------------------------------------------------------------------------------------------------------|--------------------|
| <b>TITLE</b>                       |    |                                                                                                                                                                                                                                                                                                             |                    |
| Title                              | 1  | Identify the report as a systematic review, meta-analysis, or both.                                                                                                                                                                                                                                         | 1                  |
| <b>ABSTRACT</b>                    |    |                                                                                                                                                                                                                                                                                                             |                    |
| Structured summary                 | 2  | Provide a structured summary including, as applicable: background; objectives; data sources; study eligibility criteria, participants, and interventions; study appraisal and synthesis methods; results; limitations; conclusions and implications of key findings; systematic review registration number. | 1                  |
| <b>INTRODUCTION</b>                |    |                                                                                                                                                                                                                                                                                                             |                    |
| Rationale                          | 3  | Describe the rationale for the review in the context of what is already known.                                                                                                                                                                                                                              | 3                  |
| Objectives                         | 4  | Provide an explicit statement of questions being addressed with reference to participants, interventions, comparisons, outcomes, and study design (PICOS).                                                                                                                                                  |                    |
| <b>METHODS</b>                     |    |                                                                                                                                                                                                                                                                                                             |                    |
| Protocol and registration          | 5  | Indicate if a review protocol exists, if and where it can be accessed (e.g., Web address), and, if available, provide registration information including registration number.                                                                                                                               | 4                  |
| Eligibility criteria               | 6  | Specify study characteristics (e.g., PICOS, length of follow-up) and report characteristics (e.g., years considered, language, publication status) used as criteria for eligibility, giving rationale.                                                                                                      | 4                  |
| Information sources                | 7  | Describe all information sources (e.g., databases with dates of coverage, contact with study authors to identify additional studies) in the search and date last searched.                                                                                                                                  | 4                  |
| Search                             | 8  | Present full electronic search strategy for at least one database, including any limits used, such that it could be repeated.                                                                                                                                                                               | 4                  |
| Study selection                    | 9  | State the process for selecting studies (i.e., screening, eligibility, included in systematic review, and, if applicable, included in the meta-analysis).                                                                                                                                                   | 4                  |
| Data collection process            | 10 | Describe method of data extraction from reports (e.g., piloted forms, independently, in duplicate) and any processes for obtaining and confirming data from investigators.                                                                                                                                  | 4                  |
| Data items                         | 11 | List and define all variables for which data were sought (e.g., PICOS, funding sources) and any assumptions and simplifications made.                                                                                                                                                                       | 5                  |
| Risk of bias in individual studies | 12 | Describe methods used for assessing risk of bias of individual studies (including specification of whether this was done at the study or outcome level), and how this information is to be used in any data synthesis.                                                                                      | 5                  |
| Summary measures                   | 13 | State the principal summary measures (e.g., risk ratio, difference in means).                                                                                                                                                                                                                               | 5                  |
| Synthesis of results               | 14 | Describe the methods of handling data and combining results of studies, if done, including measures of consistency (e.g., $I^2$ ) for each meta-analysis.                                                                                                                                                   | 5                  |



# PRISMA 2009 Checklist

Page 1 of 2

| Section/topic                 | #  | Checklist item                                                                                                                                                                                           | Reported on page # |
|-------------------------------|----|----------------------------------------------------------------------------------------------------------------------------------------------------------------------------------------------------------|--------------------|
| Risk of bias across studies   | 15 | Specify any assessment of risk of bias that may affect the cumulative evidence (e.g., publication bias, selective reporting within studies).                                                             | 5                  |
| Additional analyses           | 16 | Describe methods of additional analyses (e.g., sensitivity or subgroup analyses, meta-regression), if done, indicating which were pre-specified.                                                         | 5                  |
| <b>RESULTS</b>                |    |                                                                                                                                                                                                          |                    |
| Study selection               | 17 | Give numbers of studies screened, assessed for eligibility, and included in the review, with reasons for exclusions at each stage, ideally with a flow diagram.                                          | 28                 |
| Study characteristics         | 18 | For each study, present characteristics for which data were extracted (e.g., study size, PICOS, follow-up period) and provide the citations.                                                             | table 1            |
| Risk of bias within studies   | 19 | Present data on risk of bias of each study and, if available, any outcome level assessment (see item 12).                                                                                                | data supplement    |
| Results of individual studies | 20 | For all outcomes considered (benefits or harms), present, for each study: (a) simple summary data for each intervention group (b) effect estimates and confidence intervals, ideally with a forest plot. | 29                 |
| Synthesis of results          | 21 | Present results of each meta-analysis done, including confidence intervals and measures of consistency.                                                                                                  | 7-9, 29            |
| Risk of bias across studies   | 22 | Present results of any assessment of risk of bias across studies (see Item 15).                                                                                                                          | 9                  |
| Additional analysis           | 23 | Give results of additional analyses, if done (e.g., sensitivity or subgroup analyses, meta-regression [see Item 16]).                                                                                    | 9                  |
| <b>DISCUSSION</b>             |    |                                                                                                                                                                                                          |                    |
| Summary of evidence           | 24 | Summarize the main findings including the strength of evidence for each main outcome; consider their relevance to key groups (e.g., healthcare providers, users, and policy makers).                     | 10                 |
| Limitations                   | 25 | Discuss limitations at study and outcome level (e.g., risk of bias), and at review-level (e.g., incomplete retrieval of identified research, reporting bias).                                            | 11-12              |
| Conclusions                   | 26 | Provide a general interpretation of the results in the context of other evidence, and implications for future research.                                                                                  | 12                 |
| <b>FUNDING</b>                |    |                                                                                                                                                                                                          |                    |
| Funding                       | 27 | Describe sources of funding for the systematic review and other support (e.g., supply of data); role of funders for the systematic review.                                                               | 13                 |

From: Moher D, Liberati A, Tetzlaff J, Altman DG, The PRISMA Group (2009). Preferred Reporting Items for Systematic Reviews and Meta-Analyses: The PRISMA Statement. PLoS Med 6(7): e1000097. doi:10.1371/journal.pmed1000097

For more information, visit: [www.prisma-statement.org](http://www.prisma-statement.org).

For peer review only - <http://bmjopen.bmj.com/site/about/guidelines.xhtml>
